# Supplementary material for: Mandibular form and function is more disparate in amniotes than in non-amniote tetrapods from the late Palaeozoic
Source: PeerJ. 2025 Nov 26;13:e20243. doi: 10.7717/peerj.20243 (PMC12664332; doi:10.7717/peerj.20243)
Supplement: Supplemental Information 1 [file peerj-13-20243-s001.xlsx]

## Sheet: Sheet1
202	Taxon		H1	H2	H3	H4		Herbivore		FAD	LAD	source		Medial	Lateral	Occlusal		Figure source*	type	Specimen(s)
1	Crassigyrinus scoticus		Anamniote	Anamniote	Anamniote	Anamniote		Non-herbivore		336	327	PaleoDB		1	1	1		Porro et al. 2023	CT-scan/ rec (comp)	NHMUK VP R310; GSE 4722; NHMUK VP R10000	x
1	Doragnathus woodi		Anamniote	Anamniote	Anamniote	Anamniote		Non-herbivore		336	327	PaleoDB		1	1	1		Smithson 1980	Drawing/ rec (comp)	RSM GY 1898.107.51; NUZ 77.8.28	x
1	Greererpeton burkemorani		Anamniote	Anamniote	Anamniote	Anamniote		Non-herbivore		327	323.7	PaleoDB		1	1	1		Bolt and Lombard 2001	Drawing/ rec	KUVP 126315	x
1	Parrsboro jaw		Anamniote	Anamniote	Anamniote	Anamniote		Non-herbivore		318.8	317	Godfrey and Holmes 1989		1	1	1		Godfrey and Holmes 1989	Drawing/ rec	NSM 987GF65.1	x
1	Sigournea multidentata		Anamniote	Anamniote	Anamniote	Anamniote		Non-herbivore		340	336	PaleoDB		1	1			Bolt and Lombard 2006	Drawing/ rec	PR 1820	x
1	Whatcheeria deltae		Anamniote	Anamniote	Anamniote	Anamniote		Non-herbivore		340	336	PaleoDB		1	1	1		Rawson et al. 2021	CT-scan/ rec (comp)	FM PR 1814; FM PR 1665	x
1	Solenodonsaurus janenschi		Anamniote	Anamniote	Anamniote	Anamniote		Non-herbivore		309.8	307.5	PaleoDB			1			Carroll et al. 1972	Drawing/ rec	Type; MB 1901.1379	x
1	Acherontiscus caledoniae		Anamniote	Anamniote	Anamniote	Anamniote		Non-herbivore		330.9	327	PaleoDB			1			Clack et al. 2019	Drawing/ rec	NMS G 1967.13.1	x
1	Adelogyrinus simorhynchus		Anamniote	Anamniote	Anamniote	Anamniote		Non-herbivore		346.7	330.9	PaleoDB			1			Andrews and Carroll 1991	Drawing	NMS.G.1889.101.17	x
1	Adelospondylus watsoni		Anamniote	Anamniote	Anamniote	Anamniote		Non-herbivore		330.9	327	PaleoDB			1			Andrews and Carroll 1991	Drawing/ rec	NMS.G.1885.57.51	x
1	Batropetes palatinus		Anamniote	Anamniote	Anamniote	Sauropsida		Non-herbivore		298.9	295.5	PaleoDB			1			Glienke 2015	Drawing/ rec (comp)	MNHM PW 2003/52-LS; MNHM PW 2001/305-LS; GPIM N 2047a; MNHM PW 2001/309-LS	x
1	Brachydectes elongatus		Anamniote	Anamniote	Anamniote	Sauropsida		Non-herbivore		309.8	273.01	PaleoDB			1			Wellstead 1991	Drawing/ rec (comp)	UCLA-VP 2802; AMNH 6172	x
1	Carrolla craddocki		Anamniote	Anamniote	Anamniote	Sauropsida		Non-herbivore		290.1	279.3	PaleoDB			1	1		Maddin et al. 2011	CT-scan	TMM 40031-54	x
1	Coloraderpeton brilli		Anamniote	Anamniote	Anamniote	Anamniote		Non-herbivore		315.2	307	PaleoDB			1			Anderson 2003	Drawing/ rec	CM 47687	x
1	Diplocaulus magnicornis		Anamniote	Anamniote	Anamniote	Anamniote		Non-herbivore		286	273.01	PaleoDB			1	1		Douthitt 1917	Drawing/ rec (comp)	University of Chicago 221; University of Chicago 636	x
1	Diploceraspis burkei		Anamniote	Anamniote	Anamniote	Anamniote		Non-herbivore		303.7	290.1	PaleoDB		1	1			Beerbower 1963	Drawing/ rec (comp)	MCZ 3011; MCZ 3014; MCZ 3006; MCZ 3004; MCZ 3031	x
1	Euryodus dalyae		Anamniote	Anamniote	Anamniote	Sauropsida		Non-herbivore		279.3	272.3	PaleoDB		1	1	1		Gee et al. 2021	CT-scan	OMNH 53519	x
1	Huskerpeton englehorni		Anamniote	Anamniote	Anamniote	Sauropsida		Non-herbivore		298.9	295.5	PaleoDB		1	1	1		Huttenlocker et al. 2013	CT-scan	UNSM 32144	x
1	Infernovenator steenae		Anamniote	Anamniote	Anamniote	Sauropsida		Non-herbivore		309.8	307.5	PaleoDB			1			Mann et al. 2022	Drawing/ rec	FMNH PR 4203	x
1	Lethiscus stocki		Anamniote	Anamniote	Anamniote	Anamniote		Non-herbivore		346.7	336	PaleoDB		1	1			Pardo et al. 2019	CT-scan	MCZ 2185	x
1	Llistrofus pricei		Anamniote	Anamniote	Anamniote	Sauropsida		Non-herbivore		290.1	279.3	PaleoDB		1	1			Gee et al. 2019a	CT-scan	OMNH 79031	x
1	Lysorophus sp.		Anamniote	Anamniote	Anamniote	Sauropsida		Non-herbivore		303.7	286	PaleoDB			1			Bolt and Wassersug 1975	Drawing/ rec (comp)	UR 1034; UR 1035; UR 1036; UR 1230; UR 1290; UR 1292; UR 1293; UR 2406; UR 2407; UR 2408	x
1	Microbrachis pelikani		Anamniote	Anamniote	Anamniote	Anamniote		Non-herbivore		309.8	307.5	PaleoDB			1			Vallin and Laurin 2004	Drawing/ rec (comp)	MB.Am.825.1,; MB.Am.830.1; MB.Am.838.2	x
1	Nagini mazonense		Anamniote	Anamniote	Anamniote	Sauropsida		Non-herbivore		309	307	Mann et al. 2022			1			Mann et al. 2022	Drawing/ rec (comp)	MPM VP359229.2; FMNH PR 1031	x
1	Oestocephalus amphiuminus		Anamniote	Anamniote	Anamniote	Anamniote		Non-herbivore		309.8	307.5	PaleoDB		1	1			Carroll 1998	Drawing/ rec	AMNH 6857 & MCP 323	x
1	Pantylus cordatus		Anamniote	Anamniote	Anamniote	Sauropsida		Non-herbivore		290.1	286	PaleoDB		1	1	1		Xiong 2023	CT-scan	NSM 017GF020.002
1	Sauropleura scalaris		Anamniote	Anamniote	Anamniote	Anamniote		Non-herbivore		309.8	295.5	PaleoDB			1			Barták and Ivanov 2022	Drawing/ rec	ÚGV PAL00158	x
1	Westlothiana lizziae		Anamniote	Anamniote	Anamniote	Anamniote		Non-herbivore		336	330.9	PaleoDB			1			Smithson et al. 1993	Drawing/ rec	NMS G 1990.72.1	x
1	Acheloma sp.		Anamniote	Anamniote	Anamniote	Anamniote		Non-herbivore		290.1	272.3	PaleoDB		1	1	1		Gee et al. 2019b	CT-scan	OMNH 79318	x
1	Acroplous vorax		Anamniote	Anamniote	Anamniote	Anamniote		Non-herbivore		298.9	290.1	PaleoDB		1	1	1		Englehorn et al. 2008	Photograph	DMNH 44396	x
1	Actinodon frossardi		Anamniote	Anamniote	Anamniote	Anamniote		Non-herbivore		298.9	283.5	PaleoDB			1			Werneburg and Steyer 1999	Drawing	MNHN 1908-20-6	x
1	Adamanterpeton ohioensis		Anamniote	Anamniote	Anamniote	Anamniote		Non-herbivore		309.8	307.5	PaleoDB		1	1			Milner and Sequeira 1998	Drawing/ rec	AMNH 2933	x
1	Archegosaurus decheni		Anamniote	Anamniote	Anamniote	Anamniote		Non-herbivore		298.9	295.5	PaleoDB		1	1			Witzmann 2005	Drawing/ rec (comp)	MB.Am.117; MB.Am.258; MB.Am.953	x
1	Australerpeton cosgriffi		Anamniote	Anamniote	Anamniote	Anamniote		Non-herbivore		266.9	254.17	PaleoDB			1			Azevedo et al. 2017	Drawing/ rec	UFPR 0198 PV	x
1	Balanerpeton woodi		Anamniote	Anamniote	Anamniote	Anamniote		Non-herbivore		336	330.9	PaleoDB		1	1			Milner and Sequeira 1994	Drawing/ rec	GLAHMV2051	x
1	Broiliellus reiszi		Anamniote	Anamniote	Anamniote	Anamniote		Non-herbivore		298.9	272.3	PaleoDB		1	1			Holmes et al. 2013	Drawing/ rec	CM 41705	x
1	Caerorhachis bairdi		Anamniote	Anamniote	Anamniote	Anamniote		Non-herbivore		330.9	327	PaleoDB		1	1			Ruta et al. 2002	Drawing/ rec	MCZ 2271	x
1	Cochleosaurus bohemicus		Anamniote	Anamniote	Anamniote	Anamniote		Non-herbivore		309.8	307.5	PaleoDB			1			Sequeira 2003	Drawing/ rec	NMS G 1898/105/28/29	x
1	Colosteus scutellatus		Anamniote	Anamniote	Anamniote	Anamniote		Non-herbivore		309.8	307.5	PaleoDB			1			Hook 1983	Drawing/ rec	AMNH 6916	x
1	Dendrerpeton helogenes		Anamniote	Anamniote	Anamniote	Anamniote		Non-herbivore		318.7	316.9	PaleoDB		1	1	1		Arbez et al. 2022	CT-scan	NSM 987 GF 99.1	x
1	Eryopoid jaw		Anamniote	Anamniote	Anamniote	Anamniote		Non-herbivore		303.7	295.5	Witzmann 2013		1	1			Witzmann 2013	Drawing	POL-F 2012-001	x
1	Eryops megacephalus		Anamniote	Anamniote	Anamniote	Anamniote		Non-herbivore		298.8	273.01	PaleoDB		1	1	1		Sawin 1941	Drawing/ rec	MCZ 1129	x
1	Iberospondylus schultzei		Anamniote	Anamniote	Anamniote	Anamniote		Non-herbivore		301	300.4	PaleoDB		1	1			Laurin and Soler-Gijon 2006	Drawing	PU-ANF 15	x
1	Korkonterpeton kalnense		Anamniote	Anamniote	Anamniote	Anamniote		Non-herbivore		298.9	295.5	PaleoDB			1			Werneburg et al. 2020	Drawing	MEBHK – P 82447	x
1	Megalocephalus pachycephalus		Anamniote	Anamniote	Anamniote	Anamniote		Non-herbivore		318.7	316.9	PaleoDB		1	1	1		Beaumont 1977	Drawing/ rec (comp)	B.M.(N.H.) R585; H.M G15.29; H.M G15.40; H.M G15.43; G15.46	x
1	Micromelerpeton credneri		Anamniote	Anamniote	Anamniote	Anamniote		Non-herbivore		298.9	283.5	PaleoDB			1			Boy 1995	Drawing/ rec (comp)	GPIM-N200; GPIM-N207	x
1	Neldasaurus wrightae		Anamniote	Anamniote	Anamniote	Anamniote		Non-herbivore		298.9	286	PaleoDB			1			Chase 1965	Drawing/ rec (comp)	MCZ 2200; MCZ 1371	x
1	Onchiodon labyrinthicus		Anamniote	Anamniote	Anamniote	Anamniote		Non-herbivore		298.9	290.1	PaleoDB		1	1			Boy 1990	Drawing/ rec (comp)	SGED -S350; SGED-773; SGED -237a; SGED -S285; SGED -By33; SGED -By30	x
1	Phonerpeton pricei		Anamniote	Anamniote	Anamniote	Anamniote		Non-herbivore		298.9	286	PaleoDB		1	1			Dilkes 1990	Drawing/ rec (comp)	MCZ 1548; AMNH 7150; MCZ 1414	x
1	Platyrhinops lyelli		Anamniote	Anamniote	Anamniote	Anamniote		Non-herbivore		309.8	307.5	PaleoDB				1		Clack and Milner 2009	Drawing/ rec	BMNH R.2670	x
1	Procuhy nazariensis		Anamniote	Anamniote	Anamniote	Anamniote		Non-herbivore		298.9	273.01	PaleoDB				1		Cisneros et al. 2015	Drawing/ rec	UFPI PV011	x
1	Rastosuchus hammeri		Anamniote	Anamniote	Anamniote	Anamniote		Non-herbivore		261	252.17	Dias et al. 2020		1	1	1		Dias et al. 2020	Photograph	UFRGS-PV-0350-P	x
1	Rhinesuchus whaitsi		Anamniote	Anamniote	Anamniote	Anamniote		Non-herbivore		259.9	259.51	PaleoDB			1			Marsicano et al. 2017	Photograph	SAM-PK-3009	x	therein R. beaufortensis
1	Sclerocephalus haeuseri		Anamniote	Anamniote	Anamniote	Anamniote		Non-herbivore		298.9	295.5	PaleoDB		1	1			Schoch and Witzmann 2009	Drawing/ rec (comp)	BSPHM-1981 I 99; SMNS 81791	x
1	Stenokranio boldi		Anamniote	Anamniote	Anamniote	Anamniote		Non-herbivore		303.7	295.5	PaleoDB			1			Wernburg et al. 2024	Photograph	NHMMZ/LS PW 2019/5022	x
1	Trimerorhachis insignis		Anamniote	Anamniote	Anamniote	Anamniote		Non-herbivore		298.9	273.01	PaleoDB		1	1	1		Milner and Schoch 2013	Drawing/ rec	AMNH 4565	x
1	Anthracosaurus russelli		Anamniote	Anamniote	Anamniote	Anamniote		Non-herbivore		318.7	309.8	PaleoDB		1	1			Panchen 1981	Drawing/ rec (comp)	BM NH R.4822; HM G24.35	x
1	Archeria crassidisca		Anamniote	Anamniote	Anamniote	Anamniote		Non-herbivore		298.9	286	PaleoDB		1	1			Holmes 1989	Drawing/ rec	MCZ 2060	x
1	Eldeceeon rolfei		Anamniote	Anamniote	Anamniote	Anamniote		Non-herbivore		346.7	330.9	PaleoDB			1			Ruta et al. 2020	Drawing/ rec (comp)	NMS G.1990.7.1a; UMZCT.2013.3a	x
1	Eobaphetes kansensis		Anamniote	Anamniote	Anamniote	Anamniote		Non-herbivore		330.9	307.5	PaleoDB			1			Panchen 1977	Drawing/ rec	USNM 6680	x
1	Eoherpeton watsoni		Anamniote	Anamniote	Anamniote	Anamniote		Non-herbivore		330.9	327	PaleoDB		1	1	1		Porro et al. 2024	CT-scan/ rec	NMS G.1950.86	x
1	Gephyrostegus bohemicus		Anamniote	Anamniote	Anamniote	Anamniote		Non-herbivore		309.8	307.5	PaleoDB		1	1			Klembara et a. 2014	Drawing/ rec (comp)	NMP M.885; UMZC T.1337	x
1	Neopteroplax conemaughensis		Anamniote	Anamniote	Anamniote	Anamniote		Non-herbivore		307.5	300.4	PaleoDB		1	1			Romer 1963	Drawing/ rec	USNM 20636	x
1	Pholiderpeton attheyi		Anamniote	Anamniote	Anamniote	Anamniote		Non-herbivore		316.9	315.2	PaleoDB		1	1			Panchen 1972	Drawing/ rec (comp)	DMSW 27; DMSW 37; G.S.: 28318	x	Therein Eogyrinus
1	Pholiderpeton scutigerum		Anamniote	Anamniote	Anamniote	Anamniote		Non-herbivore		318.7	307	PaleoDB		1	1			Clack 1987	Drawing/ rec	NS 111.81	x
1	Point Edward jaw		Anamniote	Anamniote	Anamniote	Anamniote		Non-herbivore		327.4	324	Adams et al. 2019			1			Adams et al. 2019	Photograph	CMN 10015B	x
1	Silvanerpeton miripedes		Anamniote	Anamniote	Anamniote	Anamniote		Non-herbivore		336	330.9	PaleoDB			1			Ruta and Clack 2006	Drawing/ rec (comp)	UMZC T.1351; UMZC T.1317; NMS G. 1998.51.2; NMS G. 1998.51.1	x
1	Chroniosaurus dongusensis		Anamniote	Anamniote	Anamniote	Anamniote		Non-herbivore		264.28	259.51	PaleoDB		1	1			Tverdohklebov et al. 2005	Drawing/ rec	SGU 104B/198	x
1	Chroniosuchus paradoxus		Anamniote	Anamniote	Anamniote	Anamniote		Non-herbivore		264.28	257.4	PaleoDB		1	1			Novikov et al. 2001	Drawing/ rec	?	x
1	Laosuchus hun		Anamniote	Anamniote	Anamniote	Anamniote		Non-herbivore		254.17	252.17	PaleoDB			1	1		Liu and Chen 2020	Photograph	IVPP V 23876	x
1	Ariekanerpeton sigalovi		Anamniote	Anamniote	Anamniote	Anamniote		Non-herbivore		283.5	259.51	PaleoDB			1			Klembara and Ruta 2005	Drawing/ rec (comp)	PIN 2079/550; PIN 2079/262a	x
1	Discosauriscus austriacus		Anamniote	Anamniote	Anamniote	Anamniote		Non-herbivore		298.9	273.01	PaleoDB		1	1			Klembara 1997	Drawing/ rec (comp)	K 6, KO 4, KO 10, KO 11	x
1	Karpinskiosaurus secundus		Anamniote	Anamniote	Anamniote	Anamniote		Non-herbivore		264.28	257.4	PaleoDB		1	1			Klembara 2011	Drawing/ rec	PIN 4617/158	x
1	Kotlassia prima		Anamniote	Anamniote	Anamniote	Anamniote		Non-herbivore		264.28	257.4	PaleoDB		1	1			Ruta et al. 2002	Drawing/ rec	?	x
1	Makowskia laticephala		Anamniote	Anamniote	Anamniote	Anamniote		Non-herbivore		298.9	283.5	PaleoDB			1			Klembara 2005	Drawing/ rec	SNM Z 26506	x
1	Seymouria baylorensis		Anamniote	Anamniote	Anamniote	Anamniote		Non-herbivore		290.1	272.3	PaleoDB		1	1			Laurin 1996	Drawing	MCZ 1083	x
1	Spinarerpeton brevicephalum		Anamniote	Anamniote	Anamniote	Anamniote		Non-herbivore		298.9	283.5	PaleoDB			1			Klembara 2009	Drawing/ rec	SNM Z 26701	x
1	Utegenia shpinari		Anamniote	Anamniote	Anamniote	Anamniote		Non-herbivore		273.01	272.3	PaleoDB			1			Klembara and Ruta 2003	Drawing/ rec	PIN 369	x
1	Desmatodon hesperis		Anamniote	Synapsida	Anamniote	Anamniote		Herbivore		306	303.7	PaleoDB		1	1	1		own	CT-scan	MB.R.6450	x
1	Diadectes absitus		Anamniote	Synapsida	Anamniote	Anamniote		Herbivore		290.1	279.3	PaleoDB		1	1	1		Ponstein et al. 2024	CT-scan	MNG 14473	x
1	Diadectes lentus		Anamniote	Synapsida	Anamniote	Anamniote		Herbivore		298.9	286	PaleoDB		1	1	1		Welles 1941	Drawing	UCMP 33903	x
1	Kuwavaatakdectes sanmiguelensis		Anamniote	Synapsida	Anamniote	Anamniote		Herbivore		298.9	286	PaleoDB		1	1			Kissel 2010	Photograph	MCZ 2989	x	therein Oradectes
1	Limnoscelis paludis		Anamniote	Synapsida	Anamniote	Anamniote		Non-herbivore		303.7	298.9	PaleoDB		1	1			Berman et al. 2010	Drawing/ rec	YPM 811	x
1	Orobates pabsti		Anamniote	Synapsida	Anamniote	Anamniote		Herbivore		290.1	279.3	PaleoDB		1	1	1		Ponstein et al. 2024	CT-scan	MNG 10181	x
1	Tseajaia campi		Anamniote	Synapsida	Anamniote	Anamniote		Non-herbivore		298.9	286	PaleoDB		1	1			Moss 1972	Drawing/ rec	UCMP 59012	x
1	Alveusdectes fenestratus		Synapsida	Synapsida	Synapsida	Synapsida		Non-herbivore		259.9	254.17	PaleoDB		1	1	1		Liu and Bever 2015	Drawing/ rec	IVPP V 20127	x
1	Aerosaurus wellesi		Synapsida	Synapsida	Synapsida	Synapsida		Non-herbivore		303.7	286	PaleoDB		1	1			Langston and Reisz 1981	Drawing	UCMP 40097	x
1	Ascendonanus nestleri		Synapsida	Synapsida	Synapsida	Synapsida		Non-herbivore		293.52	279.3	PaleoDB			1			Spindler et al. 2018	Drawing/ rec	MNC-TA0924	x
1	Mycterosaurus longiceps		Synapsida	Synapsida	Synapsida	Synapsida		Non-herbivore		290.1	279.3	PaleoDB			1			Romer and Price 1940	Drawing/ rec	WM 692	x
1	Orovenator mayorum		Sauropsida	Sauropsida	Sauropsida	Sauropsida		Non-herbivore		290.1	279.3	PaleoDB			1			Reisz et al. 2011	Drawing/ rec	OMNH 74606	x
1	Varanops brevirostris		Synapsida	Synapsida	Synapsida	Synapsida		Non-herbivore		286	273.01	PaleoDB			1			Spindler et al. 2018	Drawing/ rec	TMM 43628-1	x
1	Casea broilii		Synapsida	Synapsida	Synapsida	Synapsida		Herbivore		279.3	272.3	PaleoDB		1	1			Williston 1913; Romer and Price 1940	Drawing/ rec	WM 698	x
1	Cotylorhynchus romeri		Synapsida	Synapsida	Synapsida	Synapsida		Herbivore		279.3	272.3	PaleoDB		1	1			Reisz et al. 2022	Drawing/ rec	OMNH 04329	x
1	Ennatosaurus tecton		Synapsida	Synapsida	Synapsida	Synapsida		Herbivore		266.9	264.28	PaleoDB		1	1			Olson 1968	Drawing/ rec (comp)	PIN 1580/16; PIN 1580/17; PIN 1580/19; PIN 1580/24	x
1	Eothyris parkeyi		Synapsida	Synapsida	Synapsida	Synapsida		Non-herbivore		290.1	279.3	PaleoDB			1			Romer and Price 1940	Drawing/ rec	MCZ 1161	x
1	Martensius bromackerensis		Synapsida	Synapsida	Synapsida	Synapsida		Non-herbivore		290.1	279.3	PaleoDB			1			own	Photograph/ rec	MNG 13814	x
1	Edaphosaurus boanerges		Synapsida	Synapsida	Synapsida	Synapsida		Herbivore		298.9	279.3	PaleoDB		1	1	1		Modesto 1995	Drawing/ rec; Photograph	MCZ 4309	x
1	Edaphosaurus claviger		Synapsida	Synapsida	Synapsida	Synapsida		Herbivore		279.3	272.3	PaleoDB			1			Williston 1925	Drawing/ rec	AMNH 4002	x	therein Naosaurus
1	Edaphosaurus cruciger		Synapsida	Synapsida	Synapsida	Synapsida		Herbivore		290.1	272.3	PaleoDB			1	1		Romer and Price 1940		WM 858; MCZ 1755	x
1	Edaphosaurus pogonias		Synapsida	Synapsida	Synapsida	Synapsida		Herbivore		279.3	272.3	PaleoDB			1			Romer and Price 1940	Drawing/ rec	AM 4009	x
1	Glaucosaurus megalops		Synapsida	Synapsida	Synapsida	Synapsida		Non-herbivore		290.1	272.3	PaleoDB			1			Romer and Price 1940	Drawing/ rec	WM 691	x
1	Gordodon kraineri		Synapsida	Synapsida	Synapsida	Synapsida		Herbivore		303.7	295.5	Lucas et al. 2018			1			Lucas et al. 2018	Drawing/ rec	NMMNH P-70796	x
1	Dimetrodon spp.		Synapsida	Synapsida	Synapsida	Synapsida		Non-herbivore		298.9	273.01	PaleoDB		1	1			Sidor 2003	Drawing/ rec (comp)	?	x
1	Haptodus garnettensis		Synapsida	Synapsida	Synapsida	Synapsida		Non-herbivore		306	303.7	PaleoDB		1	1			Laurin 1993	Drawing/ rec	ROM 43602	x
1	Ianthodon schultzei		Synapsida	Synapsida	Synapsida	Synapsida		Non-herbivore		306	303.7	PaleoDB		1	1			Spindler et al. 2015	Drawing/ rec	KUVP 133735	x
1	Ophiacodon uniformis		Synapsida	Synapsida	Synapsida	Synapsida		Non-herbivore		293.52	279.3	PaleoDB			1			Reisz 1986	Drawing/ rec	MCZ 1366	x
1	Palaeohatteria longicaudata		Synapsida	Synapsida	Synapsida	Synapsida		Non-herbivore		298.9	279.3	PaleoDB			1			Spindler 2016	Drawing/ rec	SS 13315	x
1	Pantelosaurus saxonicus		Synapsida	Synapsida	Synapsida	Synapsida		Non-herbivore		298.9	279.3	PaleoDB			1			Spindler 2016	Drawing/ rec	RS 14752	x
1	Secodontosaurus obtusidens		Synapsida	Synapsida	Synapsida	Synapsida		Non-herbivore		290.1	272.3	PaleoDB		1	1			Reisz et al. 1992	Drawing/ rec	MCZ 1124	x
1	Sphenacodon ferox		Synapsida	Synapsida	Synapsida	Synapsida		Non-herbivore		303.7	286	PaleoDB			1	1		own	Photograph	UCMP 34226; UCMP 34219	x
1	Varanosaurus acutirostris		Synapsida	Synapsida	Synapsida	Synapsida		Non-herbivore		279.3	272.3	PaleoDB		1	1			Berman et al. 1995	Drawing / rec	BSPHM 1901 XV 20	x
1	Phthinosaurus borissiaki		Synapsida	Synapsida	Synapsida	Synapsida		Non-herbivore		272.3	264.28	PaleoDB			1			Kemp 2005	Drawing/ rec	PIN 164/7	x
1	Reiszia gubini		Synapsida	Synapsida	Synapsida	Synapsida		Non-herbivore		272.5	264.28	PaleoDB		1	1	1		Ivakhnenko 2008	Drawing/ rec	PIN 162/32	x
1	Tetraceratops insignis		Synapsida	Synapsida	Synapsida	Synapsida		Non-herbivore		279.3	272.3	PaleoDB			1			Spindler 2020	Drawing/ rec	AMNH FARB 4526	x
1	Alrausuchus tagax		Synapsida	Synapsida	Synapsida	Synapsida		Non-herbivore		272.5	264.28	PaleoDB		1	1			Ivakhnenko 2008	Drawing/ rec (comp)	PIN 3706/10; PIN 3706/17; PIN 3586/14; PIN 4659/8	x
1	Biarmosuchus tener		Synapsida	Synapsida	Synapsida	Synapsida		Non-herbivore		266.9	264.28	PaleoDB		1	1			Ivakhnenko 2008	Drawing/ rec (comp)	PIN 1758/86; PIN 1758/307	x
1	Leucocephalus wewersi		Synapsida	Synapsida	Synapsida	Synapsida		Non-herbivore		259.9	254.17	PaleoDB			1			Day et al. 2018	Photograph	SAM-PK-K11112	x
1	Proburnetia viatkensis		Synapsida	Synapsida	Synapsida	Synapsida		Non-herbivore		264.28	259.51	PaleoDB			1			Modesto and Rybczynski 2001	Drawing/ rec	PIN 2416/1	x
1	Estemmenosuchus mirabilis		Synapsida	Synapsida	Synapsida	Synapsida		Non-herbivore		266.9	264.28	PaleoDB			1	1		own	Photograph	PIN 1758/6	x
1	Estemmenosuchus uralensis		Synapsida	Synapsida	Synapsida	Synapsida		Non-herbivore		266.9	264.28	PaleoDB		1	1			Ivakhnenko 2008	Drawing/ rec (comp)	PIN 1758/22; PIN 1758/200; PIN 1758/227	x
1	Jonkeria truculenta		Synapsida	Synapsida	Synapsida	Synapsida		Herbivore		264.28	259.51	PaleoDB			1	1		own	photograph	SAM PK 12030	x
1	Moschognathus whaitsi		Synapsida	Synapsida	Synapsida	Synapsida		Herbivore		259.9	259.51	PaleoDB		1	1			Broom 1914	Drawing	?	x
1	Moschops capensis		Synapsida	Synapsida	Synapsida	Synapsida		Herbivore		259.9	259.51	PaleoDB			1	1		own	Photograph	AMNH 5550	x
1	Syodon efremovi		Synapsida	Synapsida	Synapsida	Synapsida		Non-herbivore		279.5	264.28	PaleoDB		1	1	1		Ivakhnenko 2008	Drawing/ rec	PIN 157/2	x
1	Tapinocaninus pamelae		Synapsida	Synapsida	Synapsida	Synapsida		Herbivore		266.9	264.28	PaleoDB			1	1		own	Photograph	NMQR 2987	x
1	Titanophoneus potens		Synapsida	Synapsida	Synapsida	Synapsida		Non-herbivore		266.9	264.28	PaleoDB			1			King 1988	Drawing/ rec	PIN 157/1	x
1	Ulemica invisa		Synapsida	Synapsida	Synapsida	Synapsida		Herbivore		266.9	259.51	PaleoDB		1	1	1		Ivakhnenko 2008; King 1994 (therein Venjukovia prima)	Drawing/ rec	PIN 157/1112	x
1	Ulemosaurus svigagensis		Synapsida	Synapsida	Synapsida	Synapsida		Herbivore		266.9	259.51	PaleoDB		1	1			King 1988	Drawing/ rec	PIN 2/3905	x
1	Anomocephalus africanus		Synapsida	Synapsida	Synapsida	Synapsida		Herbivore		266.9	264.28	PaleoDB			1			Modesto et al. 1999	Drawing/ rec	BP/1/5582	x
1	Aulacephalodon kapoliwacela		Synapsida	Synapsida	Synapsida	Synapsida		Herbivore		259.9	254.17	PaleoDB		1	1	1		own	Photograph	NHCCLB739	x
1	Biseridens qilianicus		Synapsida	Synapsida	Synapsida	Synapsida		Herbivore		272.3	268.8	PaleoDB			1			Liu et al. 2010	Photograph	IGCAGS V 632	x
1	Brachyprosopus broomi		Synapsida	Synapsida	Synapsida	Synapsida		Herbivore		264.28	259.51	PaleoDB			1	1		Angielczyk et al. 2016; own	Photograph	SAM-PK-12259	x
1	Daptocephalus leoniceps		Synapsida	Synapsida	Synapsida	Synapsida		Herbivore		259.9	252.17	PaleoDB		1	1	1		Ewer 1961	Drawing; Photograph	BPI 349	x
1	Dicynodon lacerticeps		Synapsida	Synapsida	Synapsida	Synapsida		Herbivore		259.9	254.17	PaleoDB			1	1		King 1981	Drawing/ rec	TSK 14	x	therein D. trigonocephalus
1	Dicynodontoides sp		Synapsida	Synapsida	Synapsida	Synapsida		Herbivore		259.9	251.9	PaleoDB		1	1	1		own	Photograph; surf-scan	NMTRB2	x
1	Diictodon feliceps		Synapsida	Synapsida	Synapsida	Synapsida		Herbivore		259.9	252.17	PaleoDB			1	1		Sullivan and Reisz 2005	Drawing/ rec	ROM 52625	x
1	Emydops arctatus		Synapsida	Synapsida	Synapsida	Synapsida		Herbivore		259.9	259.51	PaleoDB			1			Olroyd and Sidor 2022	Photograph	BP/1/1307	x
1	Endothiodon tolani		Synapsida	Synapsida	Synapsida	Synapsida		Herbivore		264.28	259.51	PaleoDB			1	1		Cox and Angielczyk 2015	Photograph	NHMUK PV R12443	x
1	Endothiodon mahalanobisi		Synapsida	Synapsida	Synapsida	Synapsida		Herbivore		259.9	254.17	PaleoDB			1			Ray 2000	Drawing/ rec (comp)	ISI R206; ISI R351–352; ISI R354	x
1	Eosimops newtoni		Synapsida	Synapsida	Synapsida	Synapsida		Herbivore		259.9	259.51	PaleoDB		1	1			own	Photograph	BPI 6674	x
1	Euptychognathus bathyrhynchus		Synapsida	Synapsida	Synapsida	Synapsida		Herbivore		259.9	254.17	PaleoDB		1	1	1		own	surf-scan	NHCC LB200	x
1	Galeops whaitsi		Synapsida	Synapsida	Synapsida	Synapsida		Herbivore		264.28	259.51	PaleoDB				1		own	Photograph	SAM PK 12261	x
1	Jimusaria monanensis		Synapsida	Synapsida	Synapsida	Synapsida		Herbivore		259.9	252.17	PaleoDB			1			Shi and Liu 2023	Drawing	IVPP V31929	x
1	Kembawacela kitchingi		Synapsida	Synapsida	Synapsida	Synapsida		Herbivore		259.9	254.17	PaleoDB			1	1		Angielczyk et al. 2019	Photograph	NHCC LB18	x
1	Niassodon mfumukasi		Synapsida	Synapsida	Synapsida	Synapsida		Herbivore		259.9	254.17	PaleoDB		1	1	1		Castanhinha et al. 2014	CT-scan	ML1620	x
1	Odontocyclops whaitsi		Synapsida	Synapsida	Synapsida	Synapsida		Herbivore		259.9	254.17	PaleoDB			1	1		own	surf-scan	AMNH FARB 5566	x
1	Oudenodon bainii		Synapsida	Synapsida	Synapsida	Synapsida		Herbivore		259.9	252.17	PaleoDB		1	1	1		own	Photograph; surf-scan	SAM PK K 11588	x
1	Patranomodon nyaphulii		Synapsida	Synapsida	Synapsida	Synapsida		Herbivore		266.9	264.28	PaleoDB			1			own	Photograph	QR 3000	x
1	Rhachiocephalus magnus		Synapsida	Synapsida	Synapsida	Synapsida		Herbivore		259.9	254.17	PaleoDB			1	1		Maisch 2003	Drawing	GPIT K 30	x
1	Suminia getmanovi		Synapsida	Synapsida	Synapsida	Synapsida		Herbivore		264.28	259.51	PaleoDB		1	1	1		Rybczynski 2000; Ivakhnenko 2008	Drawing/ rec	PIN 2212/62	x
1	Aelurosaurus felinus		Synapsida	Synapsida	Synapsida	Synapsida		Non-herbivore		259.9	259.51	PaleoDB			1	1		own	Photograph	NHMUK 339	x
1	Arctognathus curvimola		Synapsida	Synapsida	Synapsida	Synapsida		Non-herbivore		259.9	254.17	PaleoDB		1	1			Kemp 1969	Drawing	FRP 91	x
1	Cynariops robustus		Synapsida	Synapsida	Synapsida	Synapsida		Non-herbivore		259.9	254.17	PaleoDB		1	1			Bendel et al. 2018	CT-scan	MB.R.999	x
1	"Delphaciognathus paucidens"		Synapsida	Synapsida	Synapsida	Synapsida		Non-herbivore		257.5	254.5	Boonstra and Broom 1935			1	1		own	Photograph	AMNH 5562	x
1	Lycaenops ornatus		Synapsida	Synapsida	Synapsida	Synapsida		Non-herbivore		259.9	254.17	PaleoDB		1	1			Levy 2023	CT-scan	NHCC LB178	x
1	Sauroctonus parringtoni		Synapsida	Synapsida	Synapsida	Synapsida		Non-herbivore		259.9	254.17	PaleoDB		1	1			Gebauer 2012	Photograph	GPIT/RE/7113	x
1	Sauroctonus progressus		Synapsida	Synapsida	Synapsida	Synapsida		Non-herbivore		264.28	259.51	PaleoDB			1	1		own	Photograph	PIN 156/54	x
1	Scylacosaurus sclateri		Synapsida	Synapsida	Synapsida	Synapsida		Non-herbivore		259.9	259.51	PaleoDB			1	1		own	Photograph	UCMP 42669	x
1	Suchogorgon golubevi		Synapsida	Synapsida	Synapsida	Synapsida		Non-herbivore		264.28	259.51	PaleoDB			1			own	Photograph	PIN 4548/158	x
1	Annatherapsidus petri		Synapsida	Synapsida	Synapsida	Synapsida		Non-herbivore		264.28	257.4	PaleoDB		1	1			Ivakhnenko 2011	Drawing/ rec	PIN 2005/1995	x
1	Karenites ornamentatus		Synapsida	Synapsida	Synapsida	Synapsida		Non-herbivore		264.28	259.51	PaleoDB		1	1			Ivakhnenko 2011	Drawing/ rec	PIN 2212/60	x
1	Glanosuchus macrops		Synapsida	Synapsida	Synapsida	Synapsida		Non-herbivore		264.28	259.51	PaleoDB		1	1			Van den Heever 1994	Drawing	SAM 11942	x	therein Ptomalestes avidus
1	Lycideops longiceps		Synapsida	Synapsida	Synapsida	Synapsida		Non-herbivore		259.9	252.17	PaleoDB			1	1		own	Photograph	BMNH R.5695	x
1	Lycosuchus vanderrieti		Synapsida	Synapsida	Synapsida	Synapsida		Non-herbivore		264.28	259.51	PaleoDB		1	1	1		Pusch et al. 2020	CT-scan/ rec	MB.R.995	x
1	Perplexisaurus foveatus		Synapsida	Synapsida	Synapsida	Synapsida		Non-herbivore		264.28	259.51	PaleoDB			1	1		own	Photographs	PIN 2212/19	x
1	Purlovia maxima		Synapsida	Synapsida	Synapsida	Synapsida		Herbivore		259.51	257.4	PaleoDB		1	1	1		Ivakhnenko 2011	Drawing/ rec	PIN 1538/47	x
1	Viatkosuchus sumini		Synapsida	Synapsida	Synapsida	Synapsida		Non-herbivore		264.28	259.51	PaleoDB		1	1			Ivakhnenko 2011	Drawing/ rec	PIN 2212/13	x
1	Dvinia prima		Synapsida	Synapsida	Synapsida	Synapsida		Non-herbivore		264.28	257.4	PaleoDB		1	1			Ivakhnenko 2013	Drawing/ rec (comp)	PIN 2005/2465; PIN 2005/2469	x
1	Procynosuchus delaharpeae		Synapsida	Synapsida	Synapsida	Synapsida		Non-herbivore		259.9	247.2	PaleoDB		1	1	1		Kemp 1979	Drawing	TSK 34	x
1	Araeoscelis gracilis		Sauropsida	Sauropsida	Anamniote	Sauropsida		Non-herbivore		279.3	272.3	PaleoDB		1	1			Vaughn 1955	Drawing/ rec (comp)	MCZ 2043; AMNH 4685; AMNH 4686	x
1	Claudiosaurus germaini		Sauropsida	Sauropsida	Sauropsida	Sauropsida		Non-herbivore		259.9	252.17	PaleoDB		1	1			Carroll 1981	Drawing/ rec (comp)	P.M. 1978- 6-1; G.C. 20/ 6	x
1	Petrolacosaurus kansensis		Sauropsida	Sauropsida	Anamniote	Sauropsida		Non-herbivore		306	303.7	PaleoDB		1	1			Reisz 1981	Drawing/ rec (comp)	KUVP 9952; KUVP 33607	x
1	Protorothyris archeri		Sauropsida	Sauropsida	Anamniote	Sauropsida		Non-herbivore		298.9	295.5	PaleoDB		1	1			Clark and Carroll 1971	Drawing/ rec (comp)	MCZ 2149; MCZ 2148	x
1	Brouffia orientalis		Sauropsida	Sauropsida	Anamniote	Sauropsida		Non-herbivore		309.8	307.5	PaleoDB			1			Klembara et al. 2024	Drawing/ rec	M 4908b	x
1	Weigeltisaurus jaekeli		Sauropsida	Sauropsida	Sauropsida	Sauropsida		Non-herbivore		259.51	254.17	PaleoDB			1			Bulanov and Sennikov 2015	Drawing/ rec	SSWG 113/7	x
1	Youngina capensis		Sauropsida	Sauropsida	Sauropsida	Sauropsida		Non-herbivore		259.9	254.17	PaleoDB		1	1	1		Hunt et al. 2023	CT-scan	BP/1/2871	x
1	Captorhinus aguti		Sauropsida	Sauropsida	Anamniote	Sauropsida		Non-herbivore		286	273.01	PaleoDB			1	1		Reisz et al. 2020	Drawing/ rec	OMNH 52329	x
1	Captorhinus laticeps		Sauropsida	Sauropsida	Anamniote	Sauropsida		Non-herbivore		286	279.3	PaleoDB		1	1			Heaton 1979	Drawing/ rec	FMNH UC 642	x	therein Eocaptorhinus
1	Gansurhinus naobaogouensis		Sauropsida	Sauropsida	Anamniote	Sauropsida		Herbivore		254.17	252.17	Liu 2023		1	1	1		Liu 2023	Photograph	IVPP V31365	x
1	Labidosaurikos meachami		Sauropsida	Sauropsida	Anamniote	Sauropsida		Herbivore		279.3	273.01	PaleoDB		1	1			Dodick and Modesto 1995	Drawing/ rec	OMNH 04331	x
1	Labidosaurus hamatus		Sauropsida	Sauropsida	Anamniote	Sauropsida		Non-herbivore		279.3	273.01	PaleoDB		1	1	1		Modesto et al. 2007; De Órfão Correia 2019	Drawing/ rec	CM76876	x
1	Moradisaurus grandis		Sauropsida	Sauropsida	Anamniote	Sauropsida		Herbivore		254.17	252.17	PaleoDB		1	1	1		Modesto et al. 2019	Drawing	MNN MOR78	x
1	Protocaptorhinus pricei		Sauropsida	Sauropsida	Anamniote	Sauropsida		Non-herbivore		290.1	279.3	PaleoDB			1			Olson 1984	Drawing/ rec	FMNH PR 678	x
1	Rhodotheratus parvus		Sauropsida	Sauropsida	Anamniote	Sauropsida		Herbivore		279.3	272.3	Albright et al. 2021		1	1			Albright et al. 2021	Drawing/ rec (comp)	FMNH UR 1250; CM 76050	x
1	Sumidadectes chozaensis		Sauropsida	Sauropsida	Anamniote	Sauropsida		Herbivore		279.3	273.01	PaleoDB				1		Olson and Barghusen 1962	Drawing/ rec (comp)	CNHM UR 97; CNHM UR 183; CNHM UR 857; USNM 21275	x	therein Captorhinikos
1	Tramuntanasaurus tiai		Sauropsida	Sauropsida	Anamniote	Sauropsida		Herbivore		273.01	252.17	Matamales-Andreu et al. 2023			1	1		Matamales-Andreu et al. 2023	Drawing/ rec	DA21/17-01-03	x
1	Mesosaurus tenuidens		Sauropsida	Sauropsida	Sauropsida	Sauropsida		Non-herbivore		290.1	279.3	PaleoDB			1			Piñeiro et al. 2012	Drawing/ rec (comp)	FC-DPV 2061; FC-DPV 2109; FC-DPV 2377; FC-DPV 2395	x
1	Milleropsis pricei		Sauropsida	Sauropsida	Sauropsida	Sauropsida		Non-herbivore		259.9	252.17	PaleoDB			1			Watson 1957	Drawing/ rec	WII	x	therein Millerosaurus
1	Belebey vegrandis		Sauropsida	Sauropsida	Sauropsida	Sauropsida		Herbivore		266.9	264.28	PaleoDB		1	1	1		Reisz et al. 2007	Drawing	SGU 104/B-2020	x
1	Bolosaurus major		Sauropsida	Sauropsida	Sauropsida	Sauropsida		Herbivore		290.1	279.3	PaleoDB		1	1	1		Jenkins et al. 2024	CT-scan	AMNH FARB 4461	x
1	Bolosaurus striatus		Sauropsida	Sauropsida	Sauropsida	Sauropsida		Herbivore		298.9	279.3	PaleoDB		1	1			Watson 1954	Drawing/ rec	AMNH 4327	x
1	Carbonodraco lundi		Sauropsida	Sauropsida	Sauropsida	Sauropsida		Non-herbivore		309.8	307.5	PaleoDB			1			Mann et al. 2019	Drawing/ rec	CM 23055	x
1	Cephalerpeton ventriarmatum		Sauropsida	Sauropsida	Anamniote	Sauropsida		Non-herbivore		309.8	307.5	PaleoDB			1			Mann et al. 2019	Drawing/ rec	YPM 796	x
1	Colobomycter pholeter		Sauropsida	Sauropsida	Sauropsida	Sauropsida		Non-herbivore		290.1	279.3	PaleoDB			1			MacDougall et al. 2017	Drawing/ rec	BMRP2008.3.1	x
1	Delorhynchus cifelli		Sauropsida	Sauropsida	Sauropsida	Sauropsida		Non-herbivore		290.1	279.3	PaleoDB		1	1	1		Rowe et al. 2023	CT-scan	OMNH 73515	x
1	Feeserpeton oklahomensis		Sauropsida	Sauropsida	Sauropsida	Sauropsida		Non-herbivore		290.1	279.3	PaleoDB		1	1	1		MacDougall et al. 2019	CT-scan	OMNH 73541	x
1	Owenetta sp.		Sauropsida	Sauropsida	Sauropsida	Sauropsida		Non-herbivore		259.9	247.2	PaleoDB		1	1			Reisz and Scott 2002	Drawing/ rec	BP/1/4195a	x
1	Bradysaurus sp.		Sauropsida	Sauropsida	Sauropsida	Sauropsida		Herbivore		264.28	259.51	PaleoDB		1	1			Kuhn 1969	Drawing/ rec	?	x
1	Deltavjatia rossicus		Sauropsida	Sauropsida	Sauropsida	Sauropsida		Herbivore		264.28	259.51	PaleoDB		1	1			Tsuji 2013	Photograph	SMNS 58317	x
1	Nochelesaurus alexanderi		Sauropsida	Sauropsida	Sauropsida	Sauropsida		Herbivore		264.28	259.51	PaleoDB		1	1	1		Van den Brandt et al. 2021	Photograph	SAM-PK-6238	x
1	Scutosaurus sp.		Sauropsida	Sauropsida	Sauropsida	Sauropsida		Herbivore		264.28	259.51	PaleoDB		1	1			Lee 1997	Drawing/ rec (comp)	PIN 11/215; PIN 156/305; PIN 156/306	x
1	Shihtienfenia permica		Sauropsida	Sauropsida	Sauropsida	Sauropsida		Herbivore		254.17	252.17	PaleoDB		1	1	1		Benton 2016	Photograph	IVPP V6772-1	x
														111	198	73		*full reference given in Supplementary File 6
