# Supplementary material for: Mandibular form and function is more disparate in amniotes than in non-amniote tetrapods from the late Palaeozoic
Source: PeerJ. 2025 Nov 26;13:e20243. doi: 10.7717/peerj.20243 (PMC12664332; doi:10.7717/peerj.20243)
Supplement: Supplemental Information 3 [file peerj-13-20243-s003.xlsx]

## Sheet: A Boxplots
Amniotes vs. Non-amniotes						Herbivores vs. Non-herbivores
Hypothesis 1	Levene test			t-test			Levene test			t-test
Trait	F value	Pr(F)		p		Trait	F value	Pr(F)		p
C1_Anterior Mechanical Advantage	4.6229	0.03363		0.18		C1_Anterior Mechanical Advantage	1.5223	0.2199		0.00024
C2_Posterior Mechanical Advantage	12.468	0.000608		0.043		C2_Posterior Mechanical Advantage	0.5342	0.4662		0.015
C3_Opening Mechanical Advantage	2.0831	0.1518		0.0024		C3_Opening Mechanical Advantage	6.2861	0.01364		2.3e-10
C4_Maximum Aspect Ratio	3.4117	0.06745		4.9e-05		C4_Maximum Aspect Ratio	6.3942	0.01288		5.4e-12
C5_Average Aspect Ratio	2.2001	0.1409		0.00017		C5_Average Aspect Ratio	4.3293	0.0398		1.5e-14
C6_Articular Offset	5.2742	0.02356		0.0058		C6_Articular Offset	7.7148	0.00645		5.1e-06
C7_Dental row length	0.1598	0.6902		7.2e-06		C7_Dental row length	11.135	0.001159		0.45
C8_Adductor Fossa length	36.331	2.309e-08		0.011		C8_Adductor Fossa length	7.8535	0.006005		0.32
C9_Symphyseal length	7.3854	0.007651		6.7e-05		C9_Symphyseal length	16.898	7.668e-05		1.1e-09
Hypothesis 2	Levene test			t-test
Trait	F value	Pr(F)		p
C1_Anterior Mechanical Advantage	7.8446	0.006032		0.037
C2_Posterior Mechanical Advantage	13.358	0.0003975		0.14
C3_Opening Mechanical Advantage	2.9787	0.0872		0.00023
C4_Maximum Aspect Ratio	8.6329	0.00403		5.5e-07
C5_Average Aspect Ratio	8.0454	0.00544		3.7e-07
C6_Articular Offset	5.2115	0.02438		0.003
C7_Dental row length	0.4271	0.5148		9.2e-06
C8_Adductor Fossa length	24.862	2.338e-06		0.042
C9_Symphyseal length	7.7597	0.006302		4.3e-05
Hypothesis 3	Levene test			t-test
Trait	F value	Pr(F)		p
C1_Anterior Mechanical Advantage	5.7745	0.01795		0.66
C2_Posterior Mechanical Advantage	23.948	3.445e-06		0.038
C3_Opening Mechanical Advantage	4.5528	0.03511		0.0039
C4_Maximum Aspect Ratio	6.1263	0.01486		1.8e-06
C5_Average Aspect Ratio	3.9598	0.0491		4e-06
C6_Articular Offset	5.6655	0.01904		0.00041
C7_Dental row length	0.1113	0.7393		0.00013
C8_Adductor Fossa length	23.959	3.429e-06		2.1e-05
C9_Symphyseal length	8.4449	0.004434		9.1e-07
Hypothesis 4	Levene test			t-test
Trait	F value	Pr(F)		p
C1_Anterior Mechanical Advantage	8.7546	0.003788		0.044
C2_Posterior Mechanical Advantage	13.403	0.0003891		0.14
C3_Opening Mechanical Advantage	2.8857	0.09222		0.00075
C4_Maximum Aspect Ratio	2.7181	0.1021		0.00041
C5_Average Aspect Ratio	1.7066	0.1942		0.00069
C6_Articular Offset	3.6791	0.05771		0.0071
C7_Dental row length	0.0443	0.8337		3.9e-06
C8_Adductor Fossa length	38.195	1.133e-08		0.014
C9_Symphyseal length	8.464	0.004391		0.0014

## Sheet: B Functional PCA Eigenvalues
	PC1	PC2	PC3	PC4	PC5	PC6	PC7	PC8	PC9
Eigenvalues	3.38489	2.06706	1.25418	0.755511	0.508778	0.455245	0.415204	0.0872863	0.0718458
Proportion of variation explained (%)	37.61	22.97	13.94	8.395	5.653	5.058	4.613	0.97	0.798
Eigenvector coefficients
C1_Anterior Mechanical Advantage	0.230019	-0.537368	-0.295949	0.111376	-0.232806	-0.0443337	-0.341582	-0.109313	0.611183
C2_Posterior Mechanical Advantage	0.139597	-0.5926	0.315839	-0.0413962	-0.104067	-0.0571605	-0.331745	0.0492135	-0.63348
C3_Opening Mechanical Advantage	0.404462	0.0138146	0.133236	0.434073	-0.0422479	-0.698567	0.374324	0.00428416	-0.0114533
C4_Maximum Aspect Ratio	0.441481	0.0664856	-0.125918	-0.5879	0.121214	-0.099377	0.0797513	-0.632426	-0.0911125
C5_Average Aspect Ratio	0.485051	0.0410236	-0.0741052	-0.43048	-0.0198528	0.0495871	0.0839255	0.74638	0.0725163
C6_Articular Offset	0.400395	0.00246477	0.0831535	0.374985	0.736637	0.348196	-0.162899	-0.0243233	0.0338674
C7_Dental row length	-0.109928	-0.181923	0.80329	-0.25155	0.109988	0.00928539	0.17526	-0.0448845	0.448724
C8_Adductor Fossa length	-0.118605	-0.539066	-0.269718	0.0074174	0.136177	0.257317	0.728487	-0.00300633	-0.0841396
C9_Symphyseal length	0.383884	0.173414	0.220509	0.250155	-0.587217	0.553984	0.178325	-0.161088	-0.0434556

## Sheet: C Functional PCA Axes
Taxon	PC1	PC2	PC3	PC4	PC5	PC6	PC7	PC8	PC9
Acheloma_sp	-1.66594	-0.244329	0.331096	0.701164	0.162877	0.537733	0.476687	-0.160812	0.025016
Acroplous_vorax	-1.58931	-0.800235	-0.199045	0.818209	-0.665668	-0.253569	-0.310852	-0.0882033	-0.00172308
Adamanterpeton_ohioensis	-2.12126	1.48525	-0.0703019	0.445886	0.587607	-0.207652	-0.316948	-0.0294435	0.132653
Aerosaurus_wellesi	-1.33138	-1.7265	-0.214012	1.22712	-0.837248	-0.843316	-1.64077	-0.159934	0.270163
Alrausuchus_tagax	0.129468	-0.250366	-1.30258	0.260972	0.000895881	1.16289	0.260688	-0.218885	0.106552
Alveusdectes_fenestratus	0.106515	-0.556366	-0.356711	-0.294806	-1.14326	0.824559	0.245976	-0.0890156	0.117357
Annatherapsidus_petri	-1.29407	4.10263	-1.46357	-0.421813	0.386586	0.0103462	-0.532737	0.484096	-0.493702
Anthracosaurus_russelli	-0.435235	-1.11473	-0.162459	-0.162358	-0.124479	-1.02166	-0.0989639	0.496625	-0.0952268
Araeoscelis_gracilis	0.0177709	-0.27729	-0.355043	0.348523	1.45029	0.107504	-0.09305	0.102102	0.180547
Archegosaurus_decheni	-2.22529	0.0999297	1.42369	0.0811752	-0.283031	0.392395	0.331777	-0.292258	-0.107465
Archeria_crassidisca	-0.288001	0.188201	0.756112	-0.117346	0.993021	0.0114482	1.33314	-0.019109	-0.0715169
Arctognathus_curvimola	1.29763	2.48466	-2.02433	-0.0654646	0.125995	-0.927862	0.736942	0.0109564	-0.440116
Aulacephalodon_kapoliwacela	4.40705	2.46922	1.92555	0.518099	-1.8977	1.93499	1.39629	-0.193689	0.11646
Balanerpeton_woodi	-1.59828	-0.411658	-0.881849	-0.182186	0.146611	0.407355	0.273773	0.0933549	0.0752701
Belebey_vegrandis	0.344635	0.838251	0.609897	0.299191	1.45238	0.963689	-0.468636	-0.672486	0.11653
Biarmosuchus_tener	1.13642	0.278895	-1.76493	-0.692882	0.00565575	0.00611369	0.137637	-0.205867	0.039417
Bolosaurus_major	1.80105	-0.20153	-1.68215	-0.694676	1.18949	-0.294926	0.415189	-0.772941	-0.0422159
Bolosaurus_striatus	2.01642	0.764302	-0.484922	-0.224723	1.11608	-1.34562	0.894783	-0.913878	-0.00791219
Bradysaurus_sp	1.72257	0.563346	-0.0136253	-1.44307	-0.243541	-1.14078	-0.286839	-0.122789	-0.0308674
Broiliellus_reiszi	-1.17971	0.163798	-0.109312	-0.172554	0.522573	-0.188251	0.143877	-0.373077	-0.0400384
Caerorhachis_bairdi	-0.967444	-0.313688	0.944101	-1.64175	-0.00390126	0.579176	0.31043	0.275134	-0.0340931
Captorhinus_laticeps	-0.853228	-2.2932	-1.96487	0.447016	-0.37581	-0.281057	0.993992	-0.0671049	0.116073
Casea_broilii	1.36371	-3.277	-0.709888	0.795911	-0.0026061	0.0427274	-0.0678089	-0.162524	0.118068
Chroniosaurus_dongusensis	-2.82786	-0.0952637	1.20633	-0.212388	-0.145339	0.546033	0.225969	-0.150647	-0.00237207
Chroniosuchus_paradoxus	-1.94672	0.272491	1.75762	0.0130035	-0.367787	0.0492378	0.115238	-0.270815	-0.112168
Claudiosaurus_germaini	-2.07796	-0.32875	1.16968	0.623139	-0.208761	-1.21354	-0.755825	0.135088	-0.00974065
Cotylorhynchus_romeri	0.828736	-1.48488	-0.702356	0.561515	0.0191187	0.425519	0.470918	0.230127	0.205643
Crassigyrinus_scoticus	-2.04392	-0.258723	0.374045	-0.0446782	-0.364257	0.770897	0.363113	0.296364	0.0632298
Cynariops_robustus	-0.710855	3.03548	-1.72126	-0.20681	-0.214046	0.224831	-0.253033	0.468251	-0.363241
Daptocephalus_leoniceps	5.82778	0.546344	1.01603	-0.39743	-1.67479	-0.784359	-0.273645	0.174987	0.408516
Delorhynchus_cifelli	0.930918	-0.728411	0.815734	1.02672	0.398258	-1.18171	0.796788	-0.095169	-0.148533
Deltavjatia_rossicus	2.63212	-0.627441	-0.474247	-2.18878	-0.0489708	-0.552159	-0.241888	-0.720469	-0.206235
Dendrerpeton_helogenes	-2.28065	-0.156559	0.854999	-0.485122	0.399124	-0.150505	0.320102	0.0997603	0.169918
Desmatodon_hesperis	2.24746	0.019953	0.804187	-1.42422	-0.0436718	-0.703377	1.60569	-0.0824049	-0.123472
Diadectes_absitus	0.478702	-1.00692	-0.74285	0.214935	0.0468351	-0.920857	-0.407555	0.255788	0.0620161
Diadectes_lentus	4.00972	-2.98197	0.295913	-0.993977	1.3331	0.539526	-0.411255	0.427007	-0.00937181
Dicynodontoides_sp	1.65141	3.33954	0.836794	1.40802	-0.58031	0.9958	0.259023	0.0656996	0.0430057
Dimetrodon_spp	1.96002	-2.24599	0.297267	-0.068815	0.86325	0.460627	-0.585958	-0.322752	0.0870925
Diploceraspis_burkei	2.56029	0.464924	-1.59033	2.57011	2.73423	0.241693	-0.388438	0.106099	0.103852
Discosauriscus_austriacus	-0.989017	-0.648389	0.0391194	0.0986834	0.229916	-0.597693	0.278832	0.309296	0.0253518
Doragnathus_woodi	-2.6351	-0.106667	1.2939	-0.0832811	0.130232	-0.116503	-0.133968	0.122901	-0.0102528
Dvinia_prima	-0.553976	4.27062	0.543008	-0.937847	0.0843099	-0.25927	-0.356417	-0.286052	0.0923045
Edaphosaurus_boanerges	4.01425	-2.81025	1.052	1.40974	0.0151795	0.936873	-0.660271	-0.0191043	-2.11069
Ennatosaurus_tecton	1.27416	-1.29727	-1.74832	-0.723842	-0.869882	0.552463	0.784624	0.558776	0.130399
Eoherpeton_watsoni	-0.229803	-0.760011	-0.515095	0.965658	1.41708	0.0598593	0.0653661	-0.248802	0.0433976
Eosimops_newtoni	4.32033	1.0862	2.02327	1.65065	0.0251932	0.118605	-0.455165	0.211714	0.493925
Eryopoid_mandible	-1.72959	-0.665097	0.952086	-0.634946	-0.258664	0.425835	-0.314609	-0.311758	-0.0276095
Eryops_megacephalus	-1.3941	-0.496122	0.445007	-0.587487	-0.00760386	0.263686	1.04938	-0.173322	-0.13271
Estemmenosuchus_uralensis	0.786276	-0.591509	-0.790728	-1.09523	-0.59288	0.273854	0.570434	0.305945	0.182251
Euptychognathus_bathyrhynchus	2.97368	0.470713	1.71891	0.940776	-1.95303	0.174978	-0.948248	-0.244661	0.0875316
Euryodus_dalyae	0.0756539	-1.8543	-0.43776	1.57449	0.113835	-1.57041	-0.430223	-0.172463	0.0863346
Feeserpeton_oklahomensis	-0.320732	-1.72138	0.481476	-0.163188	0.51965	0.769869	-0.0443638	0.187462	0.0417556
Gansurhinus_naobaogouensis	0.430665	0.2284	0.187871	0.0365855	-0.953966	0.0849183	-0.985919	-0.253893	0.177201
Gephyrostegus_bohemicus	-2.17367	-0.543835	1.12989	-0.823917	-0.0887264	0.20704	-0.212318	-0.00312127	-0.0550041
Glanosuchus_macrops	-0.168675	1.91422	-2.19553	0.60898	1.1299	1.16652	-1.21525	0.497989	-0.0930515
Greererpeton_burkemorani	-1.4554	-0.632053	0.763351	-0.387942	-0.0959717	0.478289	0.430236	0.0583135	-0.121077
Haptodus_garnettensis	-0.172222	-1.02743	-0.711318	0.0979544	0.468917	0.607971	0.25017	-0.184327	0.12022
Huskerpeton_englehorni	-1.0444	-1.37954	0.252131	0.682822	0.0415988	-0.553378	-1.57428	0.0402239	0.225619
Ianthodon_schultzei	-0.984626	-0.269609	-0.719281	-0.0336574	-0.117594	-0.110436	0.237403	-0.224581	0.0775949
Iberospondylus_schultzei	-1.69743	0.249407	1.12247	-0.166742	0.411405	-0.0606268	-0.57785	-0.0866168	0.0109944
Karenites_ornamentatus	-1.41183	3.71618	-0.510405	-0.357696	-0.0524871	-0.495667	-0.462051	-0.326256	-0.197459
Karpinskiosaurus_secundus	-1.30635	-1.31094	-0.465549	-0.419721	-0.34717	-0.075553	-0.848598	0.22755	0.262224
Kotlassia_prima	-0.714998	-1.78121	-0.626964	-0.359925	-0.504655	0.308056	-0.65643	-0.0204195	0.275695
Kuwavaatakdectes_sanmiguelensis	1.26857	0.0998388	-0.789583	-0.88532	-0.150136	-0.602892	0.283697	0.41391	0.0941558
Labidosaurikos_meachami	-0.774288	-0.461406	-0.578894	0.793908	-0.141569	-1.16345	1.32975	0.0452815	-0.168573
Labidosaurus_hamatus	0.190248	-1.38701	-1.35659	0.17681	-0.183284	-0.220466	0.825003	0.147158	0.0744018
Lethiscus_stocki	-2.32008	0.00019953	0.100397	0.691256	-0.159622	0.600767	0.267116	-0.192896	0.0255037
Limnoscelis_paludis	0.360208	-0.672538	0.175217	0.0875134	-0.679771	0.0757555	-0.140808	0.198991	0.091967
Llistrofus_pricei	0.237578	-1.01084	-2.05291	1.51529	-0.879965	-0.142885	0.697559	0.0987884	0.0100333
Lycaenops_ornatus	0.520454	1.89813	-1.71112	-0.217134	-0.266624	0.753931	-0.930141	-0.302765	-0.0436592
Lycosuchus_vanderrieti	0.0950853	2.2076	-1.56442	0.465616	0.0357494	0.115127	-1.44813	0.220702	0.0484279
Megalocephalus_pachycephalus	-0.884321	-0.615479	1.63616	-0.754031	0.678638	0.609908	-0.168343	0.432648	-0.151508
Moradisaurus_grandis	-1.35947	-0.262414	-0.361982	0.537864	-0.406872	-0.798869	0.211428	-0.107099	0.00469478
Moschognathus_whaitsi	3.24762	-1.20373	0.675573	0.425956	0.178195	1.82579	-0.169272	-0.0838081	0.207577
Neopteroplax_conemaughensis	0.0923989	-0.31604	0.521987	-0.227185	1.08341	0.225381	0.0236645	-0.040331	-0.0178387
Niassodon_mfumukasi	4.01197	2.8999	1.93849	2.02874	1.6469	-0.687135	0.75091	-0.0198684	0.299901
Nochelesaurus_alexanderi	2.43378	0.200759	-0.255079	-1.25265	-0.88365	-0.758385	-1.573	-0.42725	-0.239937
Oestocephalus_amphiuminus	-1.07655	1.18031	-2.56277	1.48982	-1.08043	0.95837	-0.0437063	-0.296261	-0.455424
Onchiodon_labyrinthicus	-2.31386	-0.337048	1.44436	-0.785767	0.179292	-0.032225	-0.819717	0.0401847	-0.00293847
Orobates_pabsti	-0.597466	-1.28632	-0.106102	0.665712	-0.851155	0.455644	0.477087	-0.118049	0.223291
Oudenodon_bainii	3.05621	2.60116	1.59849	0.69031	-0.837036	-1.82174	0.811188	0.365851	0.0930012
Owenetta_sp	-0.592384	-0.0486381	-0.221172	1.38779	-1.25382	-0.0850583	-0.690326	-0.238505	0.147451
Pantylus_cordatus	-0.222429	0.112044	2.13781	-0.801557	-0.440387	0.473521	-0.382973	0.294913	-0.205653
Parrsboro_jaw	-1.05737	-0.131854	0.970752	-0.626406	-0.441326	0.389153	0.0862884	0.156595	-0.107643
Pholiderpeton_attheyi	0.387985	-0.693197	0.612477	-1.58677	0.512984	-0.190865	0.734169	0.277265	-0.130969
Pholiderpeton_scutigerum	0.439354	-0.3194	0.0684905	-1.25539	0.776102	-0.25345	0.575253	-0.0119456	-0.143896
Phonerpeton_pricei	-1.22638	-0.28286	1.05211	0.158504	-0.204219	0.259683	0.836693	-0.254406	-0.183463
Petrolacosaurus_kansensis	-1.82511	-0.652122	-0.339289	0.107477	-0.10142	-0.355107	0.520085	-0.0342702	0.0899763
Procynosuchus_delaharpeae	-0.218208	3.44156	1.71732	-0.0328429	0.722227	0.511537	0.0462991	-0.331889	0.363573
Protorothyris_archeri	-1.60482	-0.771778	0.62064	-0.0358425	0.640239	0.304174	-0.09803	-0.0163551	0.0863079
Purlovia_maxima	0.792988	1.95829	-1.22892	-0.84168	-0.0693349	0.683642	1.07382	0.575745	-0.20165
Rastosuchus_hammeri	-0.84314	-0.777634	0.466377	0.474117	-0.186243	-1.14836	0.144228	0.204355	-0.149982
Reiszia_gubini	-1.56446	0.422337	-0.295464	0.216232	-0.627401	0.182909	0.461749	-0.444915	-0.112679
Rhodotheratus_parvus	-0.133731	-1.96632	-2.33983	0.440283	-0.923146	0.152486	0.666274	-0.319302	0.140347
Sauroctonus_parringtoni	0.300632	1.51794	-1.76321	-0.737696	-0.246819	0.428655	-0.662337	-0.0544618	-0.0269496
Sclerocephalus_haeuseri	-2.04598	-0.113342	-0.205652	-0.251856	-0.0650056	-0.153444	0.0782735	0.0132915	0.089657
Scutosaurus_sp	3.29325	-0.623673	-0.629216	-3.51291	0.494142	-0.364471	-1.2748	-0.396959	0.145511
Secodontosaurus_obtusidens	-1.60642	-0.250292	-0.229008	0.653139	-0.181804	-0.458357	0.701193	-0.164884	0.0458491
Seymouria_baylorensis	-0.26023	0.353707	-0.454228	-0.742843	-0.237924	-0.758119	-0.126187	0.0627432	0.0618661
Shihtienfenia_permica	1.66415	0.454427	0.853684	0.328522	-0.0809968	-1.32156	-0.103677	0.639764	-0.151699
Sigournea_multidentata	-2.26428	0.11188	1.68719	0.0676169	0.640369	0.281149	-0.364959	0.233736	-0.000342999
Suminia_getmanovi	0.293457	0.299119	0.252539	-0.679594	0.0666179	1.00002	-0.101065	0.104816	0.27749
Syodon_efremovi	-0.486789	1.01019	-0.834507	-0.58699	-0.691727	0.147156	0.270008	-0.0194101	0.00230168
Trimerorhachis_insignis	-1.01922	-0.578718	2.19461	0.617417	-0.0838933	-0.861254	-0.466595	0.056945	-0.584196
Tseajaia_campi	-1.10491	0.982468	-0.381649	-0.702518	0.387542	-0.228244	0.242671	0.383304	0.0587793
Ulemica_invisa	2.57728	-1.34993	-0.298363	-0.165702	0.725725	0.577619	-0.111881	0.733553	0.399695
Ulemosaurus_svigagensis	3.64046	-1.83998	0.358453	0.227051	-0.0670802	0.236743	-0.244775	0.0101476	0.0944012
Varanosaurus_acutirostris	-2.36743	0.49572	0.756704	0.254037	0.438261	-0.0552703	0.217052	-0.0753927	0.0795845
Viatkosuchus_sumini	-0.368528	1.47594	-2.1902	0.275837	-0.308069	-0.313943	-0.483403	0.391127	-0.0933099
Whatcheeria_deltae	-0.872566	-0.706655	0.85845	-0.0812503	-0.0213039	-0.233479	-0.48505	0.25223	-0.0590168
Youngina_capensis	-2.81962	1.16014	0.33994	0.471337	0.0922236	-0.053291	-0.206588	0.0950171	0.173265

## Sheet: D Functional PCA Morphospace
Comparison	Following phylogenetic hypothesis:	dispRity			PERMANOVA
		W	p		F	p (adj.)
Amniotes vs. Non-amniote tetrapods	Hypothesis 1	999996	0		11.7587	0.001
Amniotes vs. Non-amniote tetrapods	Hypothesis 2	999997	0		14.8926	0.001
Amniotes vs. Non-amniote tetrapods	Hypothesis 3	999998	0		14.6993	0.001
Amniotes vs. Non-amniote tetrapods	Hypothesis 4	999986	0		11.0873	0.001
Sauropsida vs. Non-amniote tetrapods	Hypothesis 1	52596	1.48364e-262		5.24181	0.006
Synapsida vs. Non-amniote tetrapods	Hypothesis 1	0	0		13.9101	0.003
Synapsida vs. Sauropsida	Hypothesis 1	1031	0		2.98554	0.039
Sauropsida vs. Non-amniote tetrapods	Hypothesis 2	10612	0		8.07444	0.003
Synapsida vs. Non-amniote tetrapods	Hypothesis 2	1	0		16.2585	0.003
Synapsida vs. Sauropsida	Hypothesis 2	4953	0		2.40668	0.147
Sauropsida vs. Non-amniote tetrapods	Hypothesis 3	27569	1.47723e-292		5.86326	0.009
Synapsida vs. Non-amniote tetrapods	Hypothesis 3	0	0		14.4808	0.003
Synapsida vs. Sauropsida	Hypothesis 3	20521	2.66561e-301		1.65288	0.495
Sauropsida vs. Non-amniote tetrapods	Hypothesis 4	41481	1.1171e-275		5.642	0.006
Synapsida vs. Non-amniote tetrapods	Hypothesis 4	9	0		13.7946	0.003
Synapsida vs. Sauropsida	Hypothesis 4	546	0		3.75025	0.012
Herbivores vs. Non-herbivores	-	999360	0		25.6974	0.001

## Sheet: E Lateral PCA EFA
Taxon	A1	A2	A3	A4	A5	A6	A7	A8	A9	A10	B1	B2	B3	B4	B5	B6	B7	B8	B9	B10	C1	C2	C3	C4	C5	C6	C7	C8	C9	C10	D1	D2	D3	D4	D5	D6	D7	D8	D9	D10
Acheloma_sp	-0.0168287	-0.0197103	0.0046733	0.00290187	0.00164351	-0.00250533	0.00147649	0.00255859	-0.000241844	-0.00177805	1.56252	0.0111884	-0.162736	0.00118905	0.0555431	-0.00168805	-0.0235013	-0.00114657	0.0133663	-0.00170837	-0.226713	-0.122401	0.0652652	0.0228147	-0.0215534	-0.0110339	0.0241742	0.00869936	-0.0143821	-0.00375531	-0.00509743	0.0660287	0.000523958	0.00588737	0.00228685	-0.00176852	7.27193e-05	-0.00673936	0.0029974	-0.00382437
Acherontiscus_caledoniae	-0.0204122	-0.0236529	0.0206297	0.0058511	-0.00569344	-0.00544181	0.00986492	-0.00247195	-0.00272109	-0.00117307	1.4719	0.0187249	-0.15592	0.00248203	0.0426149	0.00507307	-0.0260779	0.0028009	0.0116451	-3.49381e-05	-0.419972	-0.053378	0.0686647	-0.00670285	-0.00694589	-0.0204561	0.0205723	0.00136139	-0.00115342	-0.00399578	-0.0116621	0.102113	-0.0298188	0.0372689	-0.0101911	-0.00305966	0.00343725	0.00960948	-0.00753685	-0.000288446
Acroplous_vorax	-0.023893	-0.00450022	0.0176953	-0.0085275	0.0015433	-0.000701497	0.00316042	-0.00395957	0.00300663	0.00085852	1.56178	0.0277268	-0.159613	-0.0127609	0.0433487	0.0116102	-0.0190888	-0.0105285	0.013277	0.00525007	-0.22825	-0.0325962	0.0574967	0.0254999	-0.0111085	-0.0335799	0.0239269	0.00895177	-0.00642431	-0.0170169	-0.00527106	0.0385699	-0.014619	0.0170261	-0.00389545	0.00118506	-0.000521888	0.00685857	0.000147914	-0.00635273
Actinodon_frossardi	-0.00144781	-0.013938	0.00325544	-0.00598491	0.00241414	-6.14021e-06	-0.00070037	0.000404104	0.00270239	-0.00139529	1.55303	-0.00378234	-0.159784	0.00688893	0.0502994	-0.0055473	-0.0262118	0.00539132	0.0135047	-0.00264875	-0.254054	-0.060066	0.0559646	0.0343988	-0.00962091	-0.0258318	0.0154394	0.000491655	-0.0178865	-0.00498086	-0.00325049	0.0826994	-0.0262629	0.00935696	0.00179793	0.00010873	-0.0026064	-0.00599305	0.00183642	0.00367779
Adamanterpeton_ohioensis	-0.0156796	-0.0230621	0.00682825	0.0127325	-0.00238889	-0.00705	0.00245246	0.00489622	-0.00248895	-0.00329235	1.56324	-0.0185136	-0.162442	0.00995333	0.0524503	-0.00689831	-0.0230415	0.00365232	0.0135856	-0.00250123	-0.234957	-0.072562	0.0643113	0.0194499	-0.0197793	-0.00847282	0.023268	-0.00391923	-0.0177928	0.00296615	0.00185537	0.0832444	0.0488413	-0.00527628	-0.0131997	0.00624216	0.000542632	-0.0101736	0.000874184	0.00322481
Adelogyrinus_simorhynchus	-0.016898	-0.0171898	0.00734177	0.0093917	0.00268026	-0.00499874	0.000901199	-0.000354684	4.3399e-06	0.000657649	1.4789	-0.00152904	-0.140371	0.0196839	0.0427431	-0.0112229	-0.0218098	0.00899102	0.010863	-0.00590041	-0.397801	-0.102962	0.0701098	0.0217944	-0.00985289	-0.0109983	0.0127525	-0.000308117	-0.00168968	-0.000915443	-0.00690465	0.0782951	-0.012296	0.0159077	-0.00393506	-0.00815858	-0.00458592	0.00865757	-0.00111557	-0.0043446
Adelospondylus_watsoni	-0.0143185	-0.0309024	0.011633	0.0134685	0.00468162	-0.00976625	0.00202208	0.00197314	-0.00124668	0.00210713	1.4836	-0.00284516	-0.139671	0.0168535	0.0448985	-0.0137754	-0.0196062	0.00645851	0.0158535	-0.00776619	-0.361156	-0.190941	0.0675005	0.0201409	-0.00852832	-0.0178173	0.0188857	-0.00332493	-0.0088986	0.0101018	-0.00626121	0.0759153	0.0136482	0.0132568	-0.0045929	-0.00229331	0.00200769	-0.0041896	0.0133562	-0.00598302
Aelurosaurus_felinus	0.123694	-0.194397	0.0735187	0.0467703	-0.0781419	0.0124765	0.0178018	-0.00963875	0.00769829	-0.0115397	1.4268	0.0821495	-0.0370152	-0.107004	0.0357042	0.0458067	-0.0480776	0.00141246	0.019461	-0.0111894	-0.465167	-0.128151	0.0604163	0.0822099	0.015509	-0.0499426	-0.00183738	0.00703073	-0.00842127	0.00653599	0.0137347	0.0849149	-0.0596493	0.076501	-0.013814	-0.0190376	0.0194105	-0.0126233	-0.00206429	0.000548266
Aerosaurus_wellesi	-0.0421242	-0.00881166	0.0144814	0.00363913	-0.00865931	-0.00283417	0.00799048	0.00147409	-0.00502243	-0.000573262	1.56636	0.00351718	-0.166384	-0.000503687	0.0552374	0.00262622	-0.0259735	-0.00188627	0.0154185	0.000864108	-0.20798	-0.0791022	0.0309687	0.013474	-0.0195133	-0.0131842	0.0171795	0.00430587	-0.00829382	-0.00224886	-0.00854608	0.0496796	-0.0041442	0.0108986	0.00335665	0.00112005	-0.00052288	0.00088756	0.00132735	-0.00524697
Alrausuchus_tagax	0.010297	-0.0213363	0.000201086	0.00386812	-0.00829044	-0.000590923	0.00216216	-0.00275458	-0.00220739	0.00255979	1.48817	0.00138514	-0.13762	-0.000981509	0.0419804	0.00359262	-0.0215144	0.00297647	0.0171724	-0.00192199	-0.361223	0.0457751	0.10597	0.0421059	0.000616134	-0.0134942	0.000296737	-0.00438871	-0.00908072	0.00762268	-0.000864435	0.066099	-0.0707717	0.0394026	0.0155508	-0.027458	-0.00639308	0.00117342	-0.0034198	-0.00169365
Alveusdectes_fenestratus	-0.0240636	-0.0115509	0.024753	-0.00425082	-0.00701301	0.00190356	0.006774	-0.000477778	-0.00603522	0.000216937	1.49001	0.0266276	-0.140956	-0.00531203	0.0382336	-0.00530943	-0.0147127	0.0074922	0.00495597	-0.00776704	-0.382454	-0.071173	0.104895	0.0209047	-0.0261141	-0.0293844	0.0202315	0.0141525	-0.0138737	0.00529353	-0.012395	0.0623824	-0.035256	0.0367032	-0.0033363	-0.00650941	0.0058803	-0.0118176	0.00288338	0.00584081
Annatherapsidus_petri	0.0562864	-0.0812578	-0.00630109	0.0127451	0.00799441	-0.0107016	-0.0152466	0.00979427	0.00663705	-0.00330888	1.47585	0.0464048	-0.129846	-0.00921477	0.037191	-0.00270481	-0.0124369	0.00885771	0.00601271	0.00509074	-0.396855	0.0252588	0.0856928	0.0488119	-0.0061705	-0.0299221	0.0056198	-0.021927	-0.00101946	0.00644904	0.00337635	0.138356	-0.120401	0.0260345	-0.0140307	-0.0165069	-0.0253352	-2.12166e-05	0.0227283	-0.0128531
Anomocephalus_africanus	-0.0137168	-0.0174918	0.0195539	-0.0093668	-0.00433464	0.00676293	0.0033347	0.00102866	-0.0119332	0.00272664	1.42441	0.0974837	-0.163352	-0.00905402	0.0421842	0.00355048	-0.0116953	-0.00425803	0.00696784	-0.00216169	-0.501655	0.0693133	0.0388868	0.0807694	-0.0466966	0.00841187	0.012361	0.0138491	-0.0133803	-0.0112146	-0.0101817	0.035954	-0.040576	0.052838	-0.00933636	0.0205636	-0.0266178	-0.00231641	-0.0076045	0.00958398
Anthracosaurus_russelli	-0.0217088	-0.0147674	0.0174222	0.00474632	-0.00938843	-1.6497e-06	0.00422102	2.9631e-05	-0.00412984	0.00054098	1.47455	0.0025747	-0.139141	-2.83218e-05	0.0479407	-0.000457628	-0.019751	0.00119157	0.00979937	-0.000570568	-0.389686	-0.104601	0.0455806	0.0182516	-0.0208016	-0.0101759	0.00817938	0.0193396	-0.0170729	-0.0040976	-0.00739532	0.0189521	-0.0111581	0.0136299	0.000270712	-0.0236892	0.0141087	0.00179574	-0.0103585	0.00457002
Araeoscelis_gracilis	-0.00841515	-0.0244372	0.0108706	0.0161137	-0.00990178	-0.0101709	0.00775432	0.00491902	-0.00218892	-0.00486053	1.48689	0.0250489	-0.148256	-0.0145949	0.043994	0.0131749	-0.0222886	-0.0057287	0.0114424	0.00224108	-0.378328	0.052282	0.0553331	-0.0127077	-0.0110434	-0.0150663	0.0118662	0.0111287	-0.00573913	-0.0116841	-0.00717521	0.107251	-0.0435221	0.00159204	-0.00112194	0.00204101	0.00376258	0.000686792	-0.00537984	0.000110229
Archegosaurus_decheni	-0.0172238	-0.014371	0.00535703	0.00509789	0.00209931	-0.00289087	-0.0026633	0.00374639	0.00076324	-0.000676778	1.56268	-0.00891168	-0.163462	0.0070176	0.0558898	-0.0109509	-0.0259612	0.00699689	0.0145296	-0.00419795	-0.218044	-0.073791	0.0695845	0.027506	-0.010933	-0.0136812	0.00490819	0.0055609	-0.012839	0.000913851	-0.00144108	0.0882841	0.0202356	-0.00503728	-0.0101805	-0.00757446	0.00654118	-0.000714019	0.00104529	0.00287528
Archeria_crassidisca	0.003247	-0.0474149	0.0184021	0.0316398	0.00149894	-0.0262015	0.0041116	0.01168	-6.45783e-05	-0.00685716	1.49093	0.0112674	-0.127173	-0.00281893	0.0294106	-3.2514e-05	-0.0106512	-0.00188311	0.01041	-0.00342926	-0.351462	-0.166676	0.0938606	0.0214216	-0.0238897	-0.0220395	0.0203619	-0.00112832	-0.00597535	0.00559308	-0.00568268	0.156054	0.00683927	-0.0217891	-0.00307162	0.00567883	0.00219499	-0.00585088	0.0127139	-0.00743152
Arctognathus_curvimola	0.100937	-0.168883	0.0431265	-0.025813	0.0311516	0.0195213	-0.0240391	0.0140221	-0.0207863	0.0059118	1.40409	0.119701	-0.0947026	-0.0265666	0.0654776	-0.0482841	-0.0101888	0.00885076	0.00906562	0.013144	-0.478722	0.0131697	0.0153896	0.062697	-0.0427926	-0.0331359	0.0374243	0.00767984	0.00996429	-0.0154298	0.0284746	0.0414388	-0.110365	0.0692376	0.0529002	0.0521763	-0.0018528	0.00484705	-0.0130513	-0.00308616
Ariekanerpeton_sigalovi	-0.0221229	-0.0106354	0.0149808	0.00345519	-0.00588102	-0.00293235	0.00368983	0.00161306	-0.0018683	-0.00226895	1.51393	0.0136356	-0.156133	-0.00502815	0.0486964	0.00196357	-0.0195488	0.000118412	0.00846753	-0.00110132	-0.341041	0.00409876	0.0838251	-0.000714253	-0.0269072	-0.0159267	0.0277071	0.00341679	-0.0142856	-0.00260888	-0.00665023	0.0546979	-0.0261169	0.00839226	-0.00694079	-0.0026313	0.00615937	-0.00345158	0.00213236	-0.00239445
Ascendonanus_nestleri	-0.0325434	-0.00883508	0.0142167	0.00685804	-0.00598726	-0.00406647	0.00502097	0.00281801	-0.00375209	-0.00223994	1.55493	0.0101907	-0.168653	-0.00198677	0.0550876	0.00129626	-0.0261093	-0.00147545	0.0144366	0.00104556	-0.249825	-0.0170254	0.0608591	-0.00531154	-0.0224154	-0.00231535	0.0121594	0.000847431	-0.0100161	-0.000769915	-0.00684111	0.0828659	-0.0101337	-0.00504626	0.00176159	-0.00265713	0.00129016	0.00193452	-0.00115575	-0.00127168
Aulacephalodon_kapoliwacela	-0.00871097	0.00588812	0.00352189	-0.00992619	-0.0104031	0.00881555	-0.000108216	-0.00990488	0.00101478	0.00743074	1.38679	-0.0445412	-0.111321	0.0235036	0.0158624	-0.023589	-0.00876471	0.0114168	0.00549849	-0.00748931	-0.547224	-0.0313168	0.0457064	0.0517607	-0.0312407	0.00587559	0.00884483	-0.020222	-0.0184567	0.00640285	-0.026466	-0.0468759	-0.136702	-0.00783923	-0.00903051	-0.0288982	-0.017628	0.00524939	0.0027855	0.0155218
Australerpeton_cosgriffi	0.0189178	-0.0170476	-0.00604502	0.0101452	0.0034152	-0.00635032	-0.00274733	0.00465632	0.00327149	-0.00268964	1.58758	-0.0096513	-0.166783	-0.00184491	0.0523213	-0.0011133	-0.02601	0.001165	0.0142443	-0.0012415	-0.215771	0.016613	0.0571808	0.0109189	-0.0315252	-0.0166885	0.0144034	0.0101566	-0.0116348	0.00267781	0.0091361	0.0746091	0.0562893	-0.00681681	-0.0156118	0.00751776	0.0122179	0.00222523	-0.000567298	0.00121272
Balanerpeton_woodi	-0.00724802	-0.0380276	0.00729156	0.0261579	0.00282594	-0.0130936	0.00103077	0.00446252	0.000424957	-0.00261863	1.51843	-0.0174957	-0.146979	0.0104367	0.0358967	-0.00621606	-0.018644	0.00675605	0.0105604	-0.0045373	-0.318925	-0.101777	0.0607997	0.0414583	-0.0366296	-0.01057	0.017593	-0.00158767	-0.00833008	-0.00119787	0.000819915	0.101785	0.0486374	0.0073218	-0.0225601	0.00674132	-0.00546268	0.00539185	-0.000194841	-0.00115838
Batropetes_palatinus	-0.0152824	-0.00639443	0.00258745	0.0114801	-0.00184548	-0.0111685	0.00551446	0.0079345	-0.00682454	-0.0045567	1.49294	0.0130728	-0.135088	-0.0158486	0.0390055	0.0164941	-0.016561	-0.0102125	0.00737596	0.00686421	-0.365454	0.070698	0.110858	-0.0281193	-0.0262939	0.000895676	0.0115903	0.00226464	-0.00354064	-0.0063448	-0.00392686	0.0139177	0.00105097	-0.0253212	0.014924	0.00912487	-0.0121681	0.0046339	0.00187727	-0.00603352
Belebey_vegrandis	0.0258888	-0.11179	0.0607992	0.025659	-0.0352202	-0.00375469	0.00873	0.000705722	0.00953782	-0.0123898	1.49802	0.0985653	-0.122541	-0.0723092	0.0465946	0.0379266	-0.0294534	-0.00612654	0.00713435	0.00215892	-0.358393	0.0414604	0.0744411	-0.00583865	0.0315174	-0.0366465	0.0170202	0.0173915	-0.00814118	-0.00474507	-0.000464315	0.108941	-0.0526993	0.0437254	-0.0312833	-0.027924	0.023032	-0.000148922	-0.001534	-0.00261363
Biarmosuchus_tener	0.0109654	-0.0373386	0.0109956	0.00555778	-0.018084	0.00166215	0.0139102	-0.00214638	-0.0103657	0.00401559	1.44547	0.0112737	-0.111284	-0.0013729	0.027491	0.00186349	-0.010678	0.00386728	0.00694004	-0.00390189	-0.457294	0.0103135	0.150287	0.0180334	-0.0136791	-0.0156399	-0.0139598	0.000283577	-0.0070206	0.00928582	-0.00403188	0.107675	-0.0757814	0.0305612	0.0148783	-0.0416286	-0.0176579	-0.00262666	-0.00150929	0.00838246
Biseridens_qilianicus	0.124024	-0.149282	0.063103	-0.0411272	-0.0123222	0.0151773	-0.0324024	0.0258583	-0.0125487	-0.00329546	1.34026	0.146216	-0.101221	-0.0661742	0.0675744	-0.0184234	-0.00787158	0.00954599	0.00567622	0.0235298	-0.581665	-0.0879961	0.0941733	0.1384	-0.0223951	-0.00901792	0.00800745	-0.0181129	-0.00199267	-0.00766714	0.028712	0.124868	-0.0833546	0.0374776	-0.0370563	0.00563387	-0.0373913	-0.00888823	-0.00438275	-0.0140276
Bolosaurus_major	-0.00716386	-0.0516969	0.020046	0.0250123	-0.00111552	-0.000673199	-0.0217993	0.0152016	0.00148447	0.0103374	1.38929	0.263736	-0.183933	-0.0463359	0.0287922	0.0173042	0.00479347	-0.0221361	0.0108613	-0.000639154	-0.541212	0.0740853	-0.0423521	0.114922	-0.0609383	-0.00651151	-0.00771809	0.0240496	-0.00172067	-0.00948487	-0.0210473	0.100277	-0.0026623	0.0458742	-0.0554619	0.0276997	-0.0115721	0.0105687	-0.00011473	0.00535728
Bolosaurus_striatus	0.0281941	-0.114128	0.0662499	0.0106903	0.00390959	-0.0252775	0.00394896	0.00224151	0.0117703	-0.00741453	1.39811	0.203622	-0.153535	-0.0494491	0.0236395	0.0328035	-0.0147477	-0.00820743	0.00286989	0.00565814	-0.50303	0.0141094	0.0756319	-0.00678754	0.0200711	-0.0546854	0.0219074	0.00653269	0.00689573	-0.006669	-0.0302255	0.207738	-0.109569	0.0520483	-0.0332628	0.00360444	0.00816178	0.00200774	0.00316536	-0.00919584
Brachydectes_elongatus	-0.0194365	-0.0316024	0.0399788	0.0179434	-0.0297412	-0.0039548	0.0118542	-0.000262661	-0.0022933	-0.00525314	1.46185	0.0808757	-0.133668	-0.0203348	0.0355307	0.0133696	-0.0203107	-0.000267363	0.00968269	-0.005045	-0.426852	-0.00828846	0.0389588	0.0394887	-0.0143986	-0.0252634	0.0128122	0.0171371	-0.0080747	-0.00738251	-0.0159199	0.077621	-0.0583614	0.0217045	-0.0142169	-0.00221317	0.00873316	6.42518e-05	-0.00799105	0.00389765
Brachyprosopus_broomi	-0.0025478	-0.0193025	0.0102976	0.000338581	-0.0159832	0.0118359	0.00682819	-0.0028582	-0.00644682	-0.00229036	1.40474	-0.00765886	-0.128603	0.013367	0.032866	-0.0056272	-0.014256	0.00864794	0.000770856	-0.00813675	-0.525546	0.0956991	0.0778114	0.0628074	-0.0228551	0.0173633	0.00770558	0.000588707	-0.0278854	0.00500928	-0.00663159	-0.0409937	-0.0969574	0.00815333	0.00978421	0.000338055	-0.0141715	-0.0079796	-0.00548653	-0.000842011
Bradysaurus_sp	0.0438675	-0.0227422	-0.0315059	-0.0281674	0.00645722	0.00631905	-0.00169253	-0.00398433	0.0119092	0.00623544	1.38213	-0.155018	-0.168303	0.0248297	0.017082	-0.0182722	0.00568905	0.0121949	-0.00564948	-0.00616412	-0.553231	-0.0472706	0.0280498	-0.0767065	-0.0810102	-0.0178671	0.0197028	-0.00857944	0.00278061	-0.00792539	0.0225971	0.0263587	0.023511	0.0705459	0.0162414	0.0139181	0.0147225	0.0234703	0.00654531	0.00696778
Broiliellus_reiszi	-0.00735619	-0.0470741	0.0227324	0.0042352	0.00968141	-0.00712347	-0.00568606	0.000529964	0.00116585	0.00433568	1.53131	0.0382835	-0.154781	-0.0046861	0.0554019	-0.0109568	-0.0223449	0.00190963	0.0203882	-0.00311058	-0.291321	-0.11254	0.0973066	0.00203711	0.0122081	-0.0325884	0.00274868	0.00952437	-0.0100342	0.00522161	-0.00954865	0.133461	-0.0174517	-0.000679601	0.000940384	-0.0251664	0.0135506	0.000333784	0.0074482	0.00254173
Brouffia_orientalis	-0.0104313	-0.0069724	0.00837755	0.00360655	-0.00439201	-0.00261899	0.00273959	0.00172079	-0.00224693	-0.00135501	1.57322	0.00435174	-0.168737	-0.00105705	0.0570437	-0.00033555	-0.0286642	-0.0001926	0.0161971	-0.000176033	-0.256185	-0.0386136	0.0574762	0.0019892	-0.00914575	-0.00541759	0.00709281	0.00914344	-0.00793003	-0.00516179	-0.00506146	0.0853341	-0.0176173	-0.00585899	0.0107683	-0.00145838	0.00169961	0.00115984	-0.00107737	0.00287085
Caerorhachis_bairdi	0.00010425	-0.0362671	-0.00373069	0.0242182	0.0109909	-0.01455	-0.00801804	0.0096131	0.00288409	-0.00573867	1.4487	-0.0159151	-0.127301	0.0197331	0.0359999	-0.0185283	-0.0154338	0.0116635	0.00802731	-0.00674603	-0.43352	-0.128955	0.0598978	0.0445225	-0.0225199	-0.000183707	0.00450568	0.005161	-0.0127828	0.00290523	0.00444248	0.0929364	0.0472353	-0.0163296	0.00268647	-0.00338569	-0.00406752	0.000605375	0.00117798	0.000992537
Captorhinus_aguti	-0.0140823	-0.00718153	-0.00182798	0.0112991	-0.00970133	-0.00114522	0.00207342	0.0055539	-0.00694427	-0.00121956	1.49859	0.0162132	-0.155331	0.000350838	0.0486866	0.00378572	-0.0212445	-0.00313806	0.0112364	0.00420519	-0.351451	-0.0358725	0.00615161	0.030213	-0.0434094	0.000408714	0.0158262	0.00458264	-0.0192751	0.00675667	-0.00959303	0.0528191	-0.0336258	0.0127974	-0.000769369	0.00709142	-0.00795795	-0.000326793	0.00805028	-0.00416469
Captorhinus_laticeps	-0.0200298	-0.0177252	0.00643414	0.0105492	-0.0140554	0.00341896	0.00847974	0.00231229	-0.00802055	-0.000586762	1.51363	0.0324649	-0.163812	-0.000732808	0.0488166	0.0112682	-0.02589	-0.00433749	0.0114889	0.00420488	-0.338115	-0.0115089	0.0223474	0.00654672	-0.0282277	0.00262079	0.00985008	0.00585625	-0.0087668	-0.00456211	-0.011393	0.0570878	-0.0479721	0.0394112	-0.00111814	-0.0015636	-0.00570192	0.00456099	-0.00518994	0.00174146
Carbonodraco_lundi	0.0177275	-0.0281664	-0.00555301	0.00757305	0.00148573	-0.00766325	0.000308384	0.00448793	-0.00229128	-0.00473829	1.51601	0.0408115	-0.157037	-0.013645	0.0420588	0.00879482	-0.00992163	-0.00701441	0.00765406	0.00461142	-0.350848	-0.0409759	0.0831082	0.0135568	-0.0331098	-0.0158483	0.0236099	0.00400189	-0.0159225	-0.00305336	-0.0061145	0.0934697	-0.0597531	-0.00142803	0.0177892	-0.000419606	-0.00112536	-0.00416636	0.0153945	-0.00109366
Carrolla_craddocki	0.000163018	-0.0133809	0.00313382	-0.00584752	0.00437074	0.000122009	0.00110084	0.00144062	0.00413188	-0.00274932	1.46339	0.043005	-0.148517	-0.00800391	0.0399715	0.0114152	-0.0117683	-0.0049788	0.00443576	0.00489654	-0.421229	0.00425238	0.0372939	0.0306323	-0.0307822	-0.0331783	0.0307855	0.0111965	-0.000923427	-0.00360864	-0.00967045	0.0729772	-0.0624083	0.00686913	0.00165337	0.0167612	-0.0111486	0.00948913	0.00411092	-0.0138047
Casea_broilii	-0.0231487	-0.0134279	0.0148798	0.0130018	-0.0133238	-0.00654477	0.00450681	0.00538598	-0.00280288	-0.00291936	1.48647	0.0398815	-0.161677	-0.00722679	0.0413387	0.0108636	-0.0216423	0.000136144	0.00530098	0.00121308	-0.396525	0.0200179	0.052704	0.0131453	-0.0394655	-0.00966036	0.0195405	0.0114438	-0.00938245	-0.00819995	-0.0170951	0.0948011	-0.0800238	0.00890014	-0.0200817	0.0108746	-0.00726483	0.00872069	-0.00388342	-0.00194338
Cephalerpeton_ventriarmatum	0.000458659	-0.0231605	-0.00508333	0.00692371	0.00342106	-0.0012153	-0.00120677	0.00398627	0.00208285	-0.00417303	1.54218	0.0206207	-0.151874	0.00153194	0.0480127	-0.00423832	-0.0238888	0.00301634	0.00984455	-0.00220806	-0.297455	-0.0761505	0.0533037	0.0340569	-0.0195418	-0.0102646	0.0150299	0.0096881	-0.00942864	-0.00773143	-0.00418059	0.0814799	-0.0194292	-0.00618749	0.00804163	-0.00199161	-0.00528213	0.00173127	-0.00626717	0.00577308
Chroniosaurus_dongusensis	-0.0213038	-0.0151713	0.00866059	0.00743729	0.00109558	-0.00613072	-0.0019927	0.00276245	0.00179538	-0.00047193	1.56507	-0.0101113	-0.163088	0.00665761	0.0526095	-0.0085448	-0.0250681	0.00626173	0.0158437	-0.00415296	-0.214022	-0.0685773	0.0609253	0.0235484	-0.0109046	-0.0140704	0.00606385	0.0071451	-0.00798581	-0.00353868	-0.000932596	0.0807128	0.0223561	-0.000521076	-0.0107301	-0.00876239	0.00891056	0.00341758	-0.00562065	-0.00145361
Chroniosuchus_paradoxus	-0.0196405	-0.0168904	0.0109458	0.00703356	-0.0004618	-0.00578341	-0.00352467	0.00454552	0.000409355	-0.00266416	1.56263	-0.0184785	-0.158798	0.00920863	0.0525609	-0.0104117	-0.0239778	0.0076633	0.013246	-0.00283837	-0.229696	-0.0793721	0.0812082	0.0208375	-0.022618	-0.00209643	0.00869676	-0.00114313	-0.0128733	0.00321031	-0.000921665	0.0946926	0.0287486	-0.0113217	-0.00732222	-0.00508161	0.0028117	0.00505788	-0.0035362	0.000196198
Claudiosaurus_germaini	-0.0303326	-0.0157454	0.0195435	0.00353659	-0.00513938	-0.00420621	0.00446475	0.00302647	-0.00415087	-0.000128384	1.56769	0.0143848	-0.167946	-0.0068054	0.0594939	0.00129075	-0.0260911	-0.00358072	0.016111	0.00250948	-0.215039	-0.0269955	0.0576479	-0.00438392	-0.0233461	-0.00609202	0.014347	-0.0010719	-0.0072895	-0.00110354	-0.00444274	0.0567649	0.0092387	-0.0117085	-0.00414065	-0.000845654	0.00404959	0.00167369	-0.00147405	-0.002584
Cochleosaurus_bohemicus	-0.0109177	-0.0292325	0.00865127	0.00825267	0.0050491	-0.00650184	-0.0048613	0.00386492	0.00103812	-0.00149918	1.54885	-0.00750028	-0.157296	0.00699749	0.0526853	-0.0122026	-0.0224234	0.00773241	0.0146324	-0.00453565	-0.247003	-0.0969031	0.0842102	0.0223545	-0.00414131	-0.0155969	0.00473097	0.00941143	-0.0138735	0.000417785	-0.000130302	0.0989266	0.0277397	0.00102062	-0.00464566	-0.0204455	0.0072207	-0.0022074	-0.00183928	0.00365394
Colobomycter_pholeter	-0.00773435	-0.0171818	0.00593848	0.0157891	-0.00674694	-0.0117119	0.00554138	0.00907636	-0.00412265	-0.0068665	1.48898	0.00739378	-0.146214	-0.00545485	0.0409541	0.00570229	-0.0156719	-0.00357135	0.00647204	0.0022508	-0.386455	0.0183144	0.0664118	-0.0161027	-0.0370246	-0.00260753	0.0166719	0.000817563	-0.00717208	-0.00294783	-0.00909485	0.0633005	-0.0388561	-0.00495844	0.00590352	0.00725846	-0.00425867	-0.000209533	-0.000156363	-0.00315572
Coloraderpeton_brilli	-0.0104651	-0.0273253	0.00669776	0.0113908	-0.00602062	-0.00494828	0.00169594	0.0029536	0.000288128	-0.00247127	1.54886	-0.0071495	-0.141413	0.00790385	0.0463739	-0.00752746	-0.019838	0.00603059	0.01135	-0.00417615	-0.231593	-0.15273	0.0598637	0.0401238	-0.0302901	-0.01401	0.0176311	0.00573414	-0.0131314	-0.00066982	-0.000794948	0.00933974	0.0399332	-0.00981724	-0.0126353	0.000561474	0.00238689	0.0027957	-0.00219502	-0.00262305
Colosteus_scutellatus	-0.0292186	-0.0044658	0.0101509	0.00321097	-0.00198481	-0.0018474	-0.000477055	0.00142996	-0.000338741	-0.00169681	1.54423	-0.0110082	-0.159561	0.00299807	0.049787	-0.0029311	-0.0229411	0.00120854	0.0126964	-0.000760318	-0.256394	-0.038232	0.0660437	0.0155418	-0.0260296	-0.0092148	0.0131499	0.00754027	-0.0112392	-0.00454364	-0.00189851	0.0544437	0.0230765	-0.00558775	-0.00488033	-0.000809072	0.000751909	-5.82549e-05	0.0016928	0.00242432
Cotylorhynchus_romeri	-0.0399845	0.0114447	0.0288589	-0.016182	-0.0224955	0.013481	0.0147837	-0.00768954	-0.00837377	0.00702598	1.47413	0.0247127	-0.13236	0.000883869	0.0268534	0.00374157	-0.00898876	0.00257021	-0.00112268	0.000131163	-0.407179	0.0920264	0.0993582	0.0117646	-0.0507569	-0.0111766	0.018815	0.0160883	-0.00162579	-0.00493758	-0.0131139	0.0272835	-0.0255782	0.0508262	-0.019783	-0.00211509	-0.0116302	0.0088126	-0.00247786	0.00652082
Crassigyrinus_scoticus	-0.0184924	-0.00757412	0.00227941	0.00835072	-0.00116291	-0.00478633	0.00222422	0.00281149	-0.00247833	-0.00193653	1.52713	-0.00206368	-0.151098	0.00449473	0.0472916	-0.0031213	-0.0194086	0.0016337	0.0110294	-0.000822773	-0.289151	-0.080317	0.0490953	0.0370959	-0.0290341	-0.02164	0.0229495	0.00181695	-0.0120343	-0.00275174	-0.0036744	0.0210537	0.0111777	0.00660053	-0.00512393	-0.0121092	0.00311707	-0.00106583	-0.00180972	0.00263975
Cynariops_robustus	0.076919	-0.186681	0.141985	-0.0487454	0.0190554	-0.0179067	-0.0148626	0.0314629	-0.0124759	6.7853e-05	1.41935	0.294844	-0.128735	-0.0925429	0.0693682	-0.0224425	0.0217976	-0.0221058	0.00651994	0.0126739	-0.440266	-0.0365512	0.00756948	0.153996	-0.0603783	-0.0094226	0.00490231	0.00181998	0.00684096	0.000755909	0.0136206	0.0330188	-0.0515579	-0.0150703	0.0200998	0.0312073	-0.0327842	0.00940394	-0.0066945	-0.0112454
Daptocephalus_leoniceps	0.0234328	-0.0342127	-0.0165728	0.0214613	0.00951088	-0.00646463	-0.00068242	-0.00574897	-0.00351016	0.00569188	1.36758	-0.0405905	-0.0799091	0.0350183	0.00402225	-0.0306889	-0.00481783	0.0136956	0.00140753	-0.00421291	-0.559464	-0.00303493	0.0395101	0.0275913	-0.0171158	0.0247914	0.0129887	-0.0199838	-0.0247305	0.011489	0.0012871	-0.0475248	-0.115195	-0.021364	0.0350941	-0.0324826	-0.0420751	0.00454962	0.00437195	0.0149972
Delorhynchus_cifelli	0.0177634	-0.0473873	0.00685679	0.0159742	-0.00197247	-0.0192102	0.00747667	0.00699491	-0.00434014	-0.00905695	1.49554	0.0362216	-0.15188	-0.00503598	0.0354531	0.0096587	-0.012645	-0.00508486	0.00858868	0.00647204	-0.367361	0.0664639	0.0508228	-0.0228476	-0.0465928	-0.00837479	0.0239604	0.00273659	0.00387409	-0.00596309	-0.0017438	0.0701593	-0.0616459	0.0095551	0.00520055	0.0206527	-0.00278481	0.00543294	-0.00046308	-0.000194942
Delphaciognathus_paucidens	-0.00946846	-0.00939845	0.0295379	-0.0161939	-0.0279398	0.00620042	0.0100921	-0.000575607	-0.008748	-0.0026512	1.50711	0.0137309	-0.141718	-0.0141264	0.0482494	-0.000295147	-0.0249267	0.00739452	0.00783121	-0.00223073	-0.38518	-0.00983964	0.101653	0.0248438	-0.014292	-0.0212601	0.00564059	-0.00663397	-0.00700123	0.0188285	-0.0218487	0.016601	-0.128302	0.0478309	0.00242662	-0.0123893	0.000570825	-0.0132451	-0.000666129	-0.00428503
Deltavjatia_rossicus	0.283585	-0.161742	-0.148709	0.027738	0.0315152	-0.016975	-0.0111789	-0.00147016	-0.015796	-0.00907471	1.30443	-0.135271	-0.0842603	0.0464727	0.00824466	-0.00873833	-0.00419567	-0.00733597	-0.00531014	0.0104352	-0.603571	-0.0214604	0.0600391	0.0504139	0.0204782	0.0363416	0.012247	0.0154996	-0.00900196	0.00438373	0.142081	0.075939	0.0300748	0.102622	0.0488675	-0.01396	-0.0216992	-0.0130558	-0.00280234	-0.0112057
Dendrerpeton_helogenes	-0.0229054	-0.0144704	0.00837988	0.00472176	-0.00030951	-0.00164927	-0.00120255	0.00259483	-3.41387e-05	-0.000723271	1.54124	0.0107717	-0.156987	-0.00252427	0.0524992	-0.00264329	-0.0239179	0.00254456	0.0129646	-0.00137436	-0.271511	-0.0236093	0.0778468	0.00478359	-0.02319	-0.00997673	0.00802304	0.00714033	-0.0142838	-0.00461343	-0.0020962	0.0712965	0.0276312	-0.000871646	-0.015329	-0.0149097	0.008345	0.00602945	-0.00385718	0.00660819
Desmatodon_hesperis	0.0159463	-0.0428936	0.0337419	-0.00879969	0.0049434	-0.00357552	0.00272909	-0.000170289	0.00132643	-0.000204151	1.40082	0.0593244	-0.143323	-0.0110411	0.0366332	0.00307054	-0.0133431	-0.00215108	0.00286649	0.00432276	-0.556983	-0.034805	0.0384856	0.0478945	-0.0345325	-0.0372117	0.0285658	-0.0114002	-0.00491768	-0.00152903	0.00258561	0.057595	0.0126897	0.0672331	-0.0248747	0.0293534	-0.00918268	0.00297988	-0.00641116	0.00378473
Diadectes_absitus	-0.0351172	-0.00553105	0.021895	-0.00567926	-0.00545915	0.00125734	0.00463839	-0.00365484	-0.00182007	0.00211438	1.46858	0.0162468	-0.147844	-0.00183295	0.0446093	-0.00114108	-0.0157365	0.000390161	0.00618771	-0.00192002	-0.394663	-0.0328381	0.0790367	0.0138982	-0.0197408	-0.0121652	0.0332391	-0.000158014	-0.00851056	-0.00627489	-0.00924989	0.0327566	-0.0203252	0.0356353	-0.0172614	-0.00424958	0.0113086	0.000725857	0.00548189	-0.00435154
Diadectes_lentus	-0.0165843	-0.0109019	0.0275322	0.00440175	-0.0108601	-0.00308139	0.00456932	0.00705417	-0.00076319	-0.00362488	1.33241	0.0651865	-0.107239	-0.0329643	0.0363344	0.00241975	-0.0153346	0.00776879	0.00612218	-0.004415	-0.613692	0.0926211	0.0306487	0.0312146	-0.0293423	-0.0396283	0.00794398	0.0106498	-0.00250325	0.00339962	-0.00594682	0.0296371	-0.00877109	0.0222656	-0.0169606	0.00423223	-0.0010772	-0.00897015	-0.00597325	0.00428626
Dicynodon_lacerticeps	0.0134528	-0.0391734	-0.00154671	0.0113876	-0.00252894	0.00104513	-0.00135264	0.000324698	0.00652734	0.0018889	1.37894	-0.0501787	-0.0775033	0.0309361	-0.000268661	-0.0292236	0.00497232	0.0239201	-0.00321735	-0.0139106	-0.545891	0.0336152	0.0817881	-0.013382	-0.00322923	0.0321668	0.0370823	8.25054e-05	-0.0110505	0.00683499	0.00164047	-0.098631	-0.100122	0.0259438	0.0708267	0.0143852	0.00464345	-0.013619	-0.00739141	0.0127709
Dicynodontoides_sp	-0.0267904	0.0207515	0.00137932	-0.0163045	-0.0109695	0.0102059	0.00391938	-0.0010275	-0.00272111	0.00124944	1.48605	0.00459187	-0.136831	0.00323974	0.0381446	-0.000601199	-0.014455	0.000550109	0.00909781	-0.000709359	-0.419086	-0.0229231	0.0235287	0.0535696	-0.0364679	-0.00050064	0.0270007	-0.00850648	-0.0235595	0.00509917	-0.0244693	0.00236611	-0.127458	0.0137625	0.0371814	-0.00684707	-0.0146429	0.00530817	0.00272656	0.00349367
Diictodon_feliceps	0.0629052	-0.0685862	-0.0407475	0.035505	0.0188681	-0.0206051	-0.0185088	0.000420198	0.00898743	0.00348577	1.38635	-0.0402928	-0.0847991	0.0368434	-0.00190225	-0.0399044	0.000128561	0.0254217	0.0121115	-0.0120745	-0.53592	0.0279391	0.0450126	0.0601065	0.0236538	0.0276112	-0.0132867	-0.00590862	0.00156113	0.00222125	0.0173302	-0.0740873	-0.069773	0.0467723	0.021275	-0.0307236	-0.0298971	0.00986614	-0.000135229	-0.0197691
Dimetrodon_spp	0.00388756	-0.0350828	0.00700081	0.0128097	-0.00807189	-0.00467258	0.00351718	-0.000952181	-0.00261849	-0.000345852	1.46024	0.0219672	-0.127103	-0.00399921	0.0323204	0.00319528	-0.0185206	0.0022204	0.011572	-0.00215072	-0.429174	0.0451436	0.107603	0.016965	-0.00978525	-0.0129146	0.0247729	0.00976037	-0.0107052	0.001973	-0.00606195	0.128056	-0.0806736	0.0368908	0.0168333	-0.0231311	-0.00691246	0.000341702	0.0024164	0.00442444
Diplocaulus_magnicornis	-0.00685758	-0.0297625	0.00333735	0.0213608	-0.000936846	-0.0196504	0.00226504	0.0168489	-0.00240804	-0.0138687	1.53109	-0.000494669	-0.152293	-0.00119908	0.0370003	0.000118664	-0.00871535	-0.000677516	-0.00177878	0.00219897	-0.317647	-0.0263426	0.0616602	0.0156261	-0.029299	-0.00824555	0.0231989	0.00413212	-0.0108722	-0.00839773	-0.00471361	0.0884516	-0.0105459	0.00101106	-0.00404357	0.00345227	-0.0118566	0.00969597	-0.00202264	-0.00130542
Diploceraspis_burkei	0.0131943	-0.0299444	0.0122106	0.0185485	-0.0132723	-0.0139355	0.0124215	0.00494771	-0.00914877	0.0008872	1.46169	0.0292285	-0.122528	-0.0240163	0.0334687	0.015968	-0.0132293	-0.0108481	0.0100202	0.00429277	-0.414347	0.151155	0.073589	0.00245121	-0.025115	-0.0158258	0.01108	0.0116877	0.00586581	-0.0166316	0.00576528	0.0416473	-0.01801	0.0230439	0.00852143	0.00810416	-0.0124088	0.00444467	-0.00887385	-0.000154352
Discosauriscus_austriacus	-0.0223864	-0.00996618	0.0135037	0.00403364	-0.00151457	-0.00411689	0.00343119	-0.000355422	-0.00312517	-0.000461194	1.52001	0.0101498	-0.159608	0.00118486	0.0489757	-0.0027203	-0.0202301	0.000606071	0.0111535	-0.00257738	-0.332042	-0.0274551	0.0864937	0.0081381	-0.0257756	-0.0137281	0.0235701	0.00117132	-0.00876596	-0.00124152	-0.00719825	0.0640399	-0.0114617	0.00832186	-0.00232707	-0.00593134	0.00189705	0.000654999	0.00532234	-0.00414979
Doragnathus_woodi	-0.0163138	-0.0070868	0.00545732	0.00294487	0.00240658	0.00119207	-0.0021178	-0.00209235	0.000283907	0.00189331	1.55611	-0.00303153	-0.16148	0.00695892	0.0523577	-0.00682388	-0.0272331	0.00513978	0.0151381	-0.00424472	-0.241893	-0.0657156	0.0498162	0.0219132	-0.0163114	-0.0102564	0.0113707	0.00284349	-0.0105545	-0.00120714	-0.00331239	0.0466762	0.00251606	0.0122316	-0.000288331	-0.0110614	-0.000144248	0.00416653	0.00214064	-0.00257262
Dvinia_prima	0.00475479	-0.0317454	0.023496	-0.00766062	-0.00609096	-0.00643025	0.00588982	0.00629197	0.00275266	-0.00962009	1.47496	0.0764017	-0.135804	-0.0192705	0.0313916	0.016863	-0.0193149	-6.05913e-05	0.0103085	-0.00287002	-0.372394	-0.114536	0.0916009	-0.0104101	-0.0253105	-0.0355559	0.0256352	0.0140245	-0.0128533	0.00853765	-0.0276931	0.123555	-0.177367	0.0261367	0.0173088	0.00541335	0.012223	-0.00374771	-0.00621169	0.00211666
Edaphosaurus_boanerges	-0.0231178	-0.0071983	0.0161102	0.0179702	-0.00549651	-0.0159683	-0.00036205	0.00287655	-0.0041548	-0.000957113	1.42517	0.0245254	-0.146335	0.0072888	0.0473899	-0.00391104	-0.0177075	-0.00306752	0.00532541	-0.00350998	-0.4887	0.110541	0.0603772	0.0577606	-0.0316886	0.00324414	0.00517436	-0.00933523	-0.0120737	-0.0033271	-0.0121851	0.0991123	-0.000393743	0.0379636	0.0186358	0.0128786	-0.0186723	0.00395359	-0.00851386	0.00502277
Edaphosaurus_claviger	0.00017399	-0.0234026	-0.00395543	0.0199906	-0.0107559	-0.00598782	-0.00161967	-0.000203143	-0.0038525	-0.00297637	1.40469	-0.0118819	-0.117751	0.0090804	0.04013	-0.00112932	-0.0151523	0.0026451	0.00872697	-0.00912979	-0.497294	0.137976	0.0829794	0.0278703	-0.00943702	0.00819664	0.00220913	0.00531874	-0.0144096	-0.00912709	-0.00243683	0.0643257	-0.0204859	0.0393399	0.0428193	-0.0018175	-0.0135244	-0.0265911	-0.00403456	-0.00379515
Edaphosaurus_cruciger	-0.0153118	-0.00721148	0.00937992	0.0134471	-0.0104464	-0.00495429	0.00466509	0.00985645	0.000178698	-0.00669988	1.37784	0.00756179	-0.121645	-0.00499985	0.0340497	-0.00427991	-0.0154775	0.00243228	0.00164236	-0.0065389	-0.557119	0.105541	0.0528526	0.0178761	-0.0350023	-0.0184837	0.00743191	0.0117534	0.000595217	-0.00670619	-0.00538943	0.092186	0.0199289	0.0428224	0.0207838	0.00870593	-0.00712932	-0.0117327	-0.00675657	0.00192517
Edaphosaurus_pogonias	-0.0328598	-0.00345762	0.0147176	0.0114896	-0.0183368	0.00244843	0.0097461	0.00442323	-0.0076182	0.00139013	1.40279	0.0261843	-0.132882	-0.00456871	0.037883	0.00189085	-0.0183937	0.00379742	0.00957151	0.000295058	-0.51241	0.0638017	0.0289608	0.0136133	-0.0447208	-0.0198422	-0.00128926	0.0109202	0.00404523	0.00496602	-0.0171633	0.0794793	-0.0133525	0.0472874	0.0113788	0.000295215	-0.0102781	0.00352159	-0.00364617	-0.00110765
Eldeceeon_rolfei	0.00412058	-0.0273018	-0.00669238	0.0154238	0.0107834	-0.0121429	-0.00711543	0.00659251	0.00321075	-0.00329811	1.51425	-0.00757369	-0.148303	0.0105321	0.0364991	-0.0150874	-0.0134683	0.00798398	0.00718668	-0.00669053	-0.34746	-0.0624732	0.0925351	0.0331473	-0.0283855	-0.0129501	0.018881	0.000807288	-0.0124214	0.00454968	0.000378622	0.10035	0.0083077	0.00147637	-0.00290316	-0.00793659	0.00145657	-0.00129171	0.00603046	-0.001295
Emydops_arctatus	0.0972599	-0.0312758	-0.0469405	-0.00809599	-0.00382993	-0.000500898	-0.00182315	-0.00457833	-0.00210596	-0.00512495	1.41919	-0.0594283	-0.139015	0.00725078	0.0345933	-0.0109012	-0.0168812	0.00430138	0.00798222	-0.00661587	-0.492739	0.0445624	0.0361874	0.0454252	0.00656489	0.0156323	0.019617	-0.000112388	-0.00144328	0.0213856	0.0268461	0.00963041	-0.0937234	0.0377346	0.0597888	-0.0117123	-0.020164	0.00900079	0.00629492	-0.00903382
Endothiodon_mahalanobisi	0.0545124	-0.0654001	-0.0348608	0.0200603	0.0159208	-0.00812523	-0.00959595	-0.00082502	0.00072794	0.000865665	1.43644	-0.042805	-0.0883519	0.0308722	0.003579	-0.023882	0.00337032	0.0146067	-0.00119138	-0.00260266	-0.461706	0.021243	0.0911543	0.0179793	0.00300669	0.0151412	0.0332716	-0.0123247	-0.0279646	-0.00309281	0.0158292	0.00368811	-0.12396	0.0223789	0.0396502	-0.0170675	-0.0409708	-0.0186175	0.00495717	-0.00166815
Endothiodon_tolani	-0.0297287	-0.00531154	0.00266539	0.00621088	-0.00631742	-0.00450673	0.0049931	0.00621096	-0.0029224	-0.00221573	1.46919	0.0369387	-0.141948	-0.000407901	0.0361245	-0.00776581	-0.016097	0.00299436	0.00898406	-0.00458511	-0.406834	0.0408814	0.0351132	0.0261036	-0.0384366	0.00640781	0.0179645	0.00837329	-0.0177135	0.00520871	-0.0121341	-0.0546001	-0.0531605	-0.00453932	0.0304867	0.022302	-0.0175154	-0.00818591	0.0015676	0.00415323
Ennatosaurus_tecton	-0.0288847	0.0103233	0.0205455	-0.014175	-0.0153979	0.00874056	0.00928932	-0.00578626	-0.0055089	0.00211823	1.41286	0.010791	-0.122452	0.00617851	0.0250056	-0.00744467	-0.00809583	0.00880806	0.00176799	-0.00484719	-0.511048	-0.0159363	0.0983332	0.00058041	-0.029445	-0.0266163	0.0117028	0.00262223	0.00117925	0.00150086	-0.0117272	0.00105547	-0.020451	0.0334036	-0.00861409	0.00776058	-0.00878881	-0.000210132	-0.00349984	0.0102652
Eobaphetes_kansensis	0.00368945	-0.0385575	0.00839297	0.0262375	0.0060002	-0.014818	-0.0048051	0.00947738	0.00323718	-0.00490894	1.45383	0.00465984	-0.111935	0.00260532	0.0244183	-0.00265551	-0.00809973	0.000638587	0.00538996	-0.00198994	-0.417906	-0.207586	0.0828082	0.038794	-0.0324546	-0.0175635	0.0222816	0.00675053	-0.0211146	0.010583	-0.00286902	0.132507	0.00244567	-0.00613633	0.00968711	-0.00215046	-0.00671221	0.00523096	0.00644464	-0.00549253
Eoherpeton_watsoni	-0.018687	-0.0162518	0.0167109	-0.00158116	0.00499268	-0.00612369	0.00120654	0.0019728	-0.000713308	0.000230705	1.51059	0.0156963	-0.150734	0.00460603	0.0504385	-0.00633182	-0.0179237	0.00166733	0.01381	-0.00560502	-0.287544	-0.178975	0.0730479	0.0238457	-0.00691701	-0.0320816	0.028441	0.0113935	-0.0146949	0.000328315	-0.0102588	0.0884937	-0.0190135	0.00706596	-0.00178852	-0.00314586	0.00345614	-0.0118451	0.00597951	-0.00222296
Eosimops_newtoni	-0.0152754	-0.010606	-0.00853063	0.0221249	-0.00655092	-0.0106446	0.00361655	0.00359159	-0.00508245	-0.00374888	1.41225	0.0127986	-0.124078	-0.0132068	0.030836	-0.00141667	-0.0179214	0.00355097	0.0142579	-0.00118315	-0.513847	0.120296	0.0560703	0.0563096	-0.0106348	0.0266385	0.0167243	0.0185928	-0.0101827	-0.00905635	-0.0182486	-0.00642387	-0.0915052	-0.0210538	0.0226561	0.0128441	-0.00712655	-0.0304622	0.0101945	-0.00225639
Eothyris_parkeyi	-0.0140507	-0.0166683	0.00879398	-3.24921e-05	-0.000859964	-0.00275597	0.00208783	0.00112701	-0.00216917	0.00023134	1.51196	0.0125967	-0.153536	0.0083037	0.0484905	-0.00541773	-0.0202196	0.00293164	0.0115795	-0.00316539	-0.339785	-0.133059	0.0628379	0.0258269	-0.0214177	-0.0127771	0.0134882	0.00551775	-0.0110946	-0.000153237	-0.00893058	0.0875714	-0.0163683	-0.0013367	0.00588872	-0.00189993	-0.00808953	0.000803445	0.00282554	-0.000778697
Eryopoid_jaw	-0.0196309	-0.0158288	0.0150545	-0.00527254	0.0047153	0.00121443	0.000525237	0.00117578	-0.00419859	0.00148326	1.52864	0.013129	-0.158056	0.002565	0.0558386	-0.00518929	-0.0222896	-0.00201237	0.0145587	0.000987354	-0.273541	-0.151051	0.0587564	0.0112255	-0.00611822	-0.0141607	0.00834199	0.0129545	-0.0150682	-0.00345203	-0.0119272	0.0887549	-0.0162475	0.0136279	0.0211422	-0.0185645	-8.89109e-05	-0.00222754	0.000545629	-0.00274913
Eryops_megacephalus	-0.0228925	-0.0136083	0.00807157	-0.00248385	0.00579029	-0.00246286	0.00181103	-0.00151081	-0.00429782	0.00294394	1.5093	-0.00840113	-0.150678	0.014512	0.0537879	-0.0108619	-0.0274072	0.00270735	0.0164608	-0.00573914	-0.331233	-0.132586	0.0687854	0.0196423	0.000342979	0.000591306	0.017703	-0.00391904	-0.0118205	-0.000725998	-0.00789638	0.0854348	-0.0124919	0.0271705	0.00236858	-0.0181111	0.00335098	-0.00747569	0.00728556	-0.00122479
Estemmenosuchus_mirabilis	0.0337446	-0.0237951	0.00724303	0.00593099	-0.0147093	-0.00210689	0.0113431	-0.000497389	-0.00983021	-0.00114435	1.4654	0.0269158	-0.133929	-0.0139949	0.0321116	0.00854151	-0.0127262	-0.000985807	0.00733493	-0.00119096	-0.476311	0.0321561	0.105798	-0.0138431	-0.0310876	-0.0140812	0.00684872	0.0102255	-0.00151974	-0.00625898	-0.00650481	0.0886092	-0.0959464	0.0262339	-0.00353442	-0.0126178	-0.000899832	-0.0100618	0.00499463	-0.0021504
Estemmenosuchus_uralensis	-0.000988931	-0.0292522	0.0174731	0.00654154	-0.0157197	-0.00111473	0.0139585	-0.00302816	-0.00630248	0.00251957	1.43563	0.0289684	-0.108746	-0.00233998	0.0164052	0.000480691	-0.00886441	0.00800792	0.0050475	-0.00853996	-0.479648	0.01723	0.148608	0.00723637	-0.0221175	-0.0227258	-0.000652517	0.0015588	0.00437547	0.00997039	-0.00751715	0.0815517	-0.112977	0.0383275	-0.00739715	-0.0273036	-0.00273198	0.00391185	0.00257627	0.00474134
Euptychognathus_bathyrhynchus	-0.0314707	0.0193683	0.0058971	-0.0175627	-0.0108365	0.00941643	0.0149705	-0.00228885	-0.008806	0.00356391	1.47038	-0.0386889	-0.139282	0.0217312	0.0437428	-0.0141049	-0.0220152	0.007124	0.0078741	-0.0061166	-0.459295	-0.049326	0.0573604	0.0438797	0.00308214	0.0207279	0.0248111	-0.00258929	-0.00153054	-0.000874681	-0.0290184	-0.027899	-0.0790285	-0.0117995	0.0224304	-0.000509084	-0.0216254	0.00378479	-0.0108306	0.002641
Euryodus_dalyae	-0.00593107	-0.0385329	0.0234301	0.0224101	-0.0209621	-0.0068381	0.00902197	0.00729608	-0.0120653	-0.000818795	1.52564	0.0660879	-0.162277	-0.0209927	0.0424051	0.0247699	-0.0267647	-0.0134791	0.00882245	0.0113795	-0.308069	0.0752546	0.0183236	0.0158211	-0.0328818	0.00139467	0.0117324	0.0142334	-0.00973469	0.000710385	-0.00563965	0.0479307	-0.0523248	0.0243239	-0.0179359	0.00211034	-0.00625537	0.00974656	0.00275807	-0.00688263
Feeserpeton_oklahomensis	-0.0259111	-0.00996103	0.0136014	0.00399124	-0.00424823	-0.00493031	0.00387903	0.00187212	-0.00264659	-0.00192355	1.48347	0.00972299	-0.150709	-0.00312899	0.0471839	0.00403081	-0.0202524	-0.00301505	0.0112834	0.00140721	-0.372195	-0.0167631	0.0717324	-0.0213434	-0.0229221	-0.00612687	0.018658	0.00113112	-0.00515296	-0.00154925	-0.00944977	0.0523241	-0.0216574	0.00962292	-0.006564	-0.00659443	0.00305279	0.00139293	0.00314527	-0.00239669
Gansurhinus_naobaogouensis	0.0191093	-0.046588	0.0127064	-0.00799196	-0.00190705	0.00590781	0.00999667	-0.00483956	0.00121913	-0.00542478	1.4842	0.0562481	-0.148198	-0.00407732	0.0505618	0.0101567	-0.0332385	0.000181288	0.0119858	0.000423141	-0.389638	-0.0737277	0.0378597	0.0238615	-0.00684003	-0.0116412	0.0293582	-0.0106968	-0.00026428	-0.00756544	-0.00338153	0.0408223	-0.0405125	0.0518971	-0.0030056	0.0179083	-0.0162677	-0.00574052	0.00348634	-0.000972345
Gephyrostegus_bohemicus	-0.0172669	-0.0140782	0.012366	0.00622429	-0.00325927	-0.00476773	-0.000491199	0.00483778	0.000162522	-0.00261987	1.53439	0.00352026	-0.156236	-0.0011191	0.0514916	-0.00399803	-0.0217586	0.00384484	0.0111159	-0.00296324	-0.27606	-0.0777189	0.0764755	0.0173438	-0.0199622	-0.0116896	0.00597743	0.0148379	-0.0121568	-0.00770743	-0.00298542	0.0820955	-0.00759751	-0.0100857	0.00635718	-0.00892454	0.00731884	0.00235949	-0.00771509	0.00239938
Glanosuchus_macrops	0.113889	-0.205372	0.0799585	0.0310017	-0.0612109	0.0147218	-0.00670441	-0.00885711	0.0214336	-0.0133636	1.45027	0.132467	-0.063884	-0.127213	0.0404673	0.0457675	-0.03422	0.0107417	0.00654893	-0.00989102	-0.395624	-0.0656754	0.0435997	0.103005	-0.0186865	-0.0741687	0.0202437	-0.00798201	-0.0113922	-0.0130484	0.00691397	0.109944	-0.0900271	0.0367333	-0.0367315	-0.00647227	-0.00431052	-0.00780289	0.0124637	0.0010168
Glaucosaurus_megalops	-0.0131879	-0.0252665	0.00930414	0.000291759	-0.00160191	-0.0011463	0.00770666	-0.00301874	-0.00351127	0.00345925	1.52602	0.00642468	-0.163563	0.00529878	0.0531014	-0.002182	-0.0243962	0.00136012	0.0174127	-0.00163293	-0.322867	-0.0766644	0.055692	-0.0103149	-0.00538383	-0.0118859	0.00960196	0.00148873	-0.00956907	-0.000501946	-0.00836689	0.0641758	-0.0279662	0.0207234	0.0160469	-0.0129598	0.000633016	0.000635629	0.00251544	-0.000273477
Gordodon_kraineri	0.00440207	-0.018936	-0.00588713	0.0134499	-0.0141041	-0.00618363	0.00463289	0.0050255	-0.00172545	-0.00296143	1.44502	0.0246371	-0.136463	-0.00604737	0.0397706	0.00579314	-0.0159002	0.000299751	0.0071075	0.00377649	-0.458255	0.0884274	0.0919505	0.0306545	-0.0282944	-0.0163665	0.00827173	0.00509142	-0.00613671	-0.00201915	-0.00115499	0.116064	-0.0291035	0.0224212	0.00438201	-0.0110677	-0.0131012	-0.00350926	-0.00139842	-0.00221558
Greererpeton_burkemorani	-0.0195057	-0.011127	0.00983391	0.00878337	-0.000724071	-0.00802387	0.000785373	0.00539384	-0.00347343	-0.00217302	1.51759	0.00377659	-0.149245	-0.00299356	0.0448724	0.000336224	-0.0181782	-0.00259225	0.0118545	0.00221133	-0.316161	-0.0536704	0.0709561	0.020062	-0.0196186	-0.0114921	0.0104096	0.00886522	-0.00755651	-0.00161802	-0.00695107	0.0861758	-0.00299888	-0.00705385	0.00770408	-0.0150461	0.000849451	0.00779224	-0.00253612	-0.00404792
Haptodus_garnettensis	-0.0144291	-0.0242908	0.00825101	0.0163152	-0.0100937	-0.00859172	0.0084654	0.0060868	-0.00643686	-0.00431217	1.49955	0.0516933	-0.153336	-0.00927978	0.0365368	0.0131104	-0.0188534	-0.00596728	0.00919865	0.00350721	-0.360061	-0.0150185	0.0770711	0.00867888	-0.0198523	-0.00781181	0.00706406	0.00676666	-0.00282664	-0.0046865	-0.015694	0.135615	-0.0724412	0.0231018	0.004212	-0.00305697	-0.00696806	0.00316063	0.00293778	-0.0041578
Huskerpeton_englehorni	-0.00974636	-0.01796	0.0112354	0.00140953	-0.00534662	-0.00868626	0.00751956	0.00161695	-0.00247108	-0.0018487	1.55116	0.0195893	-0.164787	-0.0054498	0.0492648	0.0092057	-0.0203405	-0.00607914	0.0121734	0.00350905	-0.256602	0.0299539	0.078798	-0.0260059	-0.0226207	-0.0149441	0.0223371	-0.00460375	-0.0140058	-0.00597662	-0.0100992	0.0796568	-0.0720206	-0.00369772	0.00744225	-0.00341455	-0.0107308	-0.00102913	0.0094814	-0.00227511
Ianthodon_schultzei	0.00391337	-0.0297132	0.00305274	0.0135542	-7.98329e-05	-0.00830287	0.00346494	0.00350086	-0.00300131	-0.00226296	1.53031	0.060459	-0.164264	-0.014874	0.0406166	0.0111427	-0.0167929	-0.00914252	0.0109004	0.00541551	-0.311705	-0.0236384	0.0907785	0.0160556	-0.0159592	-0.0095535	0.0124738	0.0109437	-0.00880736	-0.0066633	-0.01161	0.141911	-0.0561718	0.00256584	0.017816	-0.00593133	-0.00621107	0.00261033	0.0017045	-0.000393627
Iberospondylus_schultzei	-0.00981854	-0.0176234	0.00943809	0.00441876	0.00879538	-0.00783784	-0.00413152	0.00315889	0.00271765	-0.000186876	1.53103	0.0101151	-0.150236	0.00664487	0.0480997	-0.0102594	-0.0190336	0.00289368	0.0138262	-0.0025772	-0.256416	-0.169046	0.0852576	0.0356828	-0.0166462	-0.0232679	0.0111037	0.00622666	-0.0185861	0.00201174	-0.00660276	0.0953004	-0.00432941	-0.00756273	-0.00287106	-0.00934267	0.00220596	-0.00189883	0.00789961	0.000240889
Infernovenator_steenae	-0.00255713	-0.0283819	0.0087931	0.0101904	-0.0154263	-0.0114926	0.0139387	0.0128402	-0.00383731	-0.00562703	1.48512	0.0762253	-0.134439	-0.0162352	0.0308049	0.0212593	-0.0154299	-0.00964635	3.90427e-05	0.00453345	-0.405021	-0.0256144	0.0686464	0.0200361	-0.030163	-0.0126964	0.0282568	0.00121953	-0.00390196	-0.00227299	-0.0182338	0.0965413	-0.0968583	0.0219966	0.00628699	0.00372201	0.00238189	0.00512366	0.00463662	-0.00626452
Jimusaria_monanensis	-0.0463251	-0.0101927	0.0200613	0.0232025	-0.0052565	0.0017143	0.0018064	0.0032357	0.000293978	-0.0042859	1.411	-0.0472661	-0.0884971	0.0315054	-0.00180879	-0.0243235	0.0118582	0.0145005	-0.0121028	-0.00753573	-0.508189	0.0434991	0.106964	0.0298511	-0.0273076	0.0346804	0.0317485	0.00691217	-0.0149887	-0.0062735	-0.0258696	-0.0569762	-0.112516	0.00136171	0.0282421	0.0145275	0.010524	-0.0214168	-0.00693306	-0.00199634
Jonkeria_truculenta	0.0140602	-0.0339285	0.00580236	0.0150413	-0.00572303	-0.00761481	0.00192811	0.00458606	0.00273103	-0.00427391	1.45007	0.0186943	-0.123602	-0.00534429	0.0304551	0.00120773	-0.0123492	0.00523407	0.00499591	-0.00509057	-0.512396	0.0298284	0.131885	0.0079904	-0.0308889	-0.0194859	0.00748682	-0.000425803	-0.004003	0.00130664	-0.014086	0.0796578	-0.094023	0.00804815	-0.00639425	-0.00937328	0.0185838	-0.00086133	-0.00229157	0.00235159
Karenites_ornamentatus	0.0251585	-0.0508305	-0.0110628	0.00099055	0.00188274	-0.00456612	0.00655851	0.00736163	0.000457698	-0.00355258	1.53271	0.00933488	-0.150446	-0.00166432	0.0498262	0.0104854	-0.0171689	-0.0068689	0.00842096	-0.000911035	-0.28589	0.00995765	0.131004	-0.00544427	-0.0271757	-0.0337998	-0.000969599	0.0055023	-0.0129669	-0.00148609	-0.00534482	0.137187	-0.100917	-0.0164736	0.0124992	-0.0217117	-0.00186415	0.0110918	0.00796136	0.00180468
Karpinskiosaurus_secundus	-0.0178772	-0.0112722	0.00835011	0.00162421	0.00104329	-0.00385063	0.00293486	-0.000731051	-0.00131129	-0.00128408	1.51786	0.0150366	-0.157202	0.00258918	0.0447401	-0.00305305	-0.0197161	0.00262374	0.0102276	-0.00357575	-0.327721	-0.0590986	0.084655	0.0327153	-0.0277452	-0.0228446	0.0261396	-0.000778737	-0.00614558	-0.00301299	-0.00622243	0.0567618	-0.0100061	0.0201085	-0.0118185	0.0025049	-0.00122218	-0.00071595	0.00529596	-0.00112497
Kembawacela_kitchingi	0.025216	-0.0148914	-0.0271357	0.0135196	0.0105623	-0.00614289	-0.00482647	-0.00358988	0.000224682	0.0024078	1.35726	-0.0612963	-0.114528	0.0301165	0.0266859	-0.0324586	-0.0127017	0.0170993	0.012168	-0.00462563	-0.591871	0.0221864	0.0477473	0.0761335	0.0125679	0.0436923	0.0242315	-0.00951797	-0.00212689	0.0163486	0.00415753	-0.00356052	-0.0513373	0.0084595	0.039162	-0.0262151	-0.0221325	0.0105226	0.00268449	-0.0071052
Korkonterpeton_kalnense	-0.00724903	-0.0174303	0.00127696	0.00765433	0.00542929	-0.00677147	-0.00199213	0.00291168	0.00144349	-0.00128996	1.54445	-0.0019906	-0.156893	0.00660554	0.0509634	-0.00861947	-0.020995	0.00155995	0.0144696	-0.00330579	-0.243992	-0.0953237	0.0613521	0.0383563	-0.0128437	-0.0224564	0.00911722	0.00289025	-0.0115268	-0.00242143	-0.00421774	0.102399	-0.00233826	-0.0185864	-0.000448944	-0.0116892	0.00228576	-0.00655149	0.0111886	0.00291236
Kotlassia_prima	-0.0139732	-0.0247531	0.0243587	0.00419689	-0.00743715	-0.00859035	0.00798581	0.00121817	-0.00112112	-0.00251422	1.5088	0.0343323	-0.160963	-0.00628634	0.0430611	0.00586498	-0.0220307	6.58048e-05	0.0112971	-0.000891381	-0.353252	-0.023957	0.0560918	0.0265541	-0.0320325	-0.0145465	0.022121	0.00278941	-0.00299268	-0.00636228	-0.00420468	0.0528783	-0.0123718	0.0149481	-0.0142877	0.0145489	-0.00659853	0.00921043	-0.00608369	-0.0020149
Kuwavaatakdectes_sanmiguelensis	-0.0191696	-0.02048	0.0225189	-0.00479469	0.00166635	0.00542016	-0.00165069	0.00160667	-0.0025285	-0.00109511	1.41838	0.0292356	-0.127533	0.00104524	0.0366879	0.00244768	-0.01551	0.00341551	0.0024112	-0.00114538	-0.496962	-0.0713975	0.0390361	0.0448413	-0.0399636	-0.00767482	0.025205	0.000497843	-0.0087225	-0.00377504	-0.00895753	0.024714	0.00762217	0.0265608	-0.0191042	0.0172937	-0.0208989	0.00860668	-0.000561462	-0.00418146
Labidosaurikos_meachami	-0.0173029	-0.010996	0.00549499	-0.0012796	0.00240067	0.000551192	0.00228755	-0.00289744	0.00160001	-0.000766735	1.51561	-0.00273621	-0.158805	0.0229898	0.050731	-0.00534468	-0.0290695	0.00654711	0.0157483	-0.00231542	-0.32955	-0.108986	0.0341487	0.00330648	-0.0052278	-0.0083388	0.014539	-0.0032111	-0.00824256	-0.00101783	-0.00887924	0.0549631	-0.026298	0.0300615	4.12505e-05	-0.00232936	-0.00948429	0.00784395	-0.00187099	-0.000638431
Labidosaurus_hamatus	-0.00769757	-0.00582195	0.00497351	0.00522768	-0.0160085	0.00315371	0.00549457	0.000987867	-0.0041549	-0.000970617	1.47249	0.0168587	-0.147877	0.00331318	0.0447384	0.00696492	-0.0233151	-0.00129757	0.00910216	8.62655e-05	-0.407261	-0.0296466	0.0315368	0.0144713	-0.0336991	-0.00269799	0.0204942	0.00644396	-0.0185079	0.00197853	-0.0108822	0.0398222	-0.0698746	0.030719	-0.00110084	-0.00392549	0.00276596	0.00219208	-0.00764793	0.00360723
Laosuchus_hun	-0.0288084	-0.0134378	0.0176915	0.000988648	-0.00705687	0.00254193	0.00386186	-0.00204364	-0.00108543	-0.000462113	1.54859	0.0148492	-0.15613	-0.00665858	0.0529375	0.00549704	-0.0252287	-0.00298069	0.0112746	0.00382247	-0.23957	-0.0783195	0.042857	0.010545	-0.00903296	-0.0158209	0.0148479	0.0105584	-0.0140684	-0.00563942	-0.00878887	0.0773254	-0.0192283	0.00659308	0.0111795	-0.0109096	-0.00594514	0.00666423	0.000368628	-0.000804156
Lethiscus_stocki	-0.023648	-0.0129203	0.00745801	0.00882965	-0.00037538	-0.00796792	-0.00167608	0.00720125	0.000470929	-0.00467422	1.57691	-0.00266125	-0.163496	0.00111265	0.0508675	-0.00413159	-0.0211527	0.0032999	0.011283	-0.00304352	-0.186634	-0.0640389	0.0716069	0.0195324	-0.0276197	-0.0144831	0.015627	0.0067824	-0.0122262	-0.000924651	0.00135053	0.0699327	0.0336183	-0.0106104	-0.014832	-0.00738115	0.01825	0.00139561	-0.00462754	0.000227199
Leucocephalus_wewersi	0.0496969	-0.0561518	-0.0198872	0.0245227	-0.0159227	-0.0127566	0.00949867	0.00637204	-0.00334058	-0.00596806	1.44961	0.0175568	-0.126428	-0.00462783	0.0254099	0.0174476	-0.00964841	-0.00495533	0.00298288	-0.000746451	-0.444423	0.115983	0.141347	0.0338994	-0.0272201	-0.0194318	0.00710663	0.00628306	-0.00291822	0.000949646	0.01081	0.154013	-0.111483	0.0158363	0.0115092	-0.0167399	-0.00546996	0.00185951	-0.00383619	-0.00214186
Limnoscelis_paludis	-0.00975333	-0.0207413	-0.000504969	0.00600993	0.00062986	0.00184579	-0.000298392	-0.00445283	0.000540406	0.00396143	1.48256	-0.000893522	-0.132242	0.00368704	0.0371672	-0.00368404	-0.0164489	0.00453512	0.00935499	-0.0049153	-0.37994	-0.0904801	0.0948267	0.0360721	-0.0372962	-0.00842715	0.0292981	-0.00427428	-0.00810337	0.00238191	-0.00222982	0.0473847	0.0278494	0.0220942	-0.00432922	-0.0095221	-0.00955212	0.000469921	0.00719189	-0.00810969
Llistrofus_pricei	-0.0057717	-0.0184462	0.0202297	0.0129863	-0.0340826	-0.0013139	0.0228415	-0.000827452	-0.00980616	-0.00134032	1.50469	0.0392925	-0.118339	-0.0226812	0.023125	0.0176646	-0.0131216	-0.00661298	0.00758899	0.000910137	-0.342417	0.0622844	0.0680231	-0.0120911	-0.046204	0.00160324	0.0288301	0.00820838	-0.0139891	-0.00708101	-0.00308153	0.0509989	0.000234463	0.0218272	-0.0165353	-0.0142446	0.0109057	0.00971712	-0.00107988	-0.00658168
Lycaenops_ornatus	0.0595465	-0.129658	0.0755028	-0.00182771	-0.0508867	0.0238384	-0.00383641	0.0122174	0.00822582	-0.0266013	1.43876	0.113651	-0.0827436	-0.0893754	0.0572726	0.0226241	-0.0264328	0.0155554	-0.0059967	-0.00222344	-0.433873	-0.0482093	0.0646838	0.068686	-0.0151287	-0.0273363	0.0301518	-0.00249159	0.000254897	0.00560339	0.00191343	0.0657944	-0.111145	0.057104	0.0167792	-0.000886265	-0.00503356	-0.0131772	-0.000353638	-0.0154236
Lycideops_longiceps	-0.00172383	-0.00439571	0.0055817	-0.0114876	0.000957215	-0.00166923	0.00333114	-0.00358977	-0.00146199	0.00143322	1.55759	0.0123994	-0.168059	0.000530155	0.0560896	0.00299131	-0.0257021	-0.00267204	0.0179038	0.00015866	-0.23632	-0.126503	0.0600316	-0.0136572	-0.0189675	-0.0275917	0.0133618	0.00388846	-0.00753019	-0.000998346	-0.00967692	0.0507995	-0.105809	0.0122403	0.00871137	-0.0103126	-0.000170671	0.00959873	0.00825969	-0.00515638
Lycosuchus_vanderrieti	0.0567394	-0.0900266	0.0444322	-0.00843833	-0.0208137	0.0033748	-0.0184739	0.0234239	-0.00457872	-0.0171985	1.46414	0.103067	-0.129782	-0.059254	0.0550522	0.00322008	-0.00795806	0.00599269	-0.011967	0.0153267	-0.390288	-0.0193142	0.0538067	0.0627451	-0.0545383	-0.0112177	0.0137566	-0.0112608	-0.0029585	-0.0167112	-0.00458958	0.063117	-0.150491	0.010712	0.00414965	0.0151685	-0.0208949	0.00990289	0.00997538	-0.00591497
Lysorophus_sp	0.056453	-0.140627	0.0199014	0.095304	-0.0366065	-0.0426634	0.0222429	0.00758634	-0.00252748	0.00524393	1.43454	0.0766339	-0.0409821	-0.0594587	-0.00849897	0.0351687	-0.00522487	-0.0164744	0.016761	-0.000129605	-0.442679	-0.0204554	0.0558608	0.0319402	-0.000386443	-0.0119113	-0.00786986	0.00429135	0.00178335	0.00213744	0.00352408	0.128291	-0.0300295	-0.0111598	0.0206244	-0.0247344	0.00273644	0.00854224	-0.000153968	0.000353692
Makowskia_laticephala	-0.0332059	-0.0143736	0.0151596	0.00943438	-0.0071345	-0.005578	0.00499402	0.00485306	-0.00272984	-0.00293118	1.47397	0.0118142	-0.147919	-0.00169149	0.0409121	0.00016529	-0.0152855	0.00240625	0.00557904	-0.00248014	-0.410239	-0.025714	0.0853596	0.00270298	-0.0305859	-0.013025	0.0175026	0.00759379	-0.0134281	-0.000639783	-0.0126099	0.0979145	-0.0247279	0.00701436	0.00568677	-0.0065089	0.00155978	-0.000180454	-0.0033593	-0.00259924
Martensius_bromackerensis	-0.0259394	-0.0180206	0.0181641	0.00728521	-0.00836229	-0.0104804	0.00985044	0.00524865	-0.00609377	-0.00450399	1.52045	0.0175981	-0.15874	-0.00506731	0.0474955	0.00481037	-0.0195662	-0.00405412	0.0109567	0.00107036	-0.29835	-0.0144578	0.0871391	-0.0169918	-0.022759	-0.013424	0.0182483	0.00422067	-0.00635476	-0.00501918	-0.0105127	0.0923111	-0.0518279	0.00327347	0.00571204	-0.0019716	0.00255213	-0.000472659	0.00251484	-0.000414345
Megalocephalus_pachycephalus	-0.00816603	-0.0325259	-0.000535134	0.0221743	0.00462974	-0.010923	-0.00499156	0.0061223	0.00318592	-0.00432798	1.48929	-0.0045971	-0.126332	0.0110823	0.0347322	-0.0110264	-0.0151682	0.00911278	0.00770828	-0.00657461	-0.353407	-0.187939	0.0885173	0.0542358	-0.0379216	-0.00686809	0.0208231	0.000103727	-0.0114852	0.00401884	-0.00221625	0.0558951	0.0510508	-0.011328	-0.00232491	0.00128823	-0.00537605	0.00120993	0.00150264	-0.00281267
Mesosaurus_tenuidens	-0.0210968	-0.0109341	0.00426275	0.00583372	-0.00154492	-0.00459509	0.000637396	0.0033909	0.000848236	-0.00281409	1.59458	0.00443051	-0.169189	0.000626038	0.0580544	-0.000360048	-0.0274718	0.00231774	0.0151211	-0.00237302	-0.117213	-0.00723199	0.050425	0.0217719	-0.0234879	-0.0117353	0.00990951	0.00587979	-0.00848818	-0.00574217	0.00102708	0.0424303	0.0186064	-0.0183877	-0.0164371	0.00337671	0.00869309	0.003662	-0.00835599	-0.00268239
Microbrachis_pelikani	-0.0133209	-0.0227194	0.0146637	0.0119573	-0.0116905	-0.00411148	0.0037602	0.00919771	-0.00461032	-0.00487799	1.46309	0.0216458	-0.150311	0.000711298	0.041011	0.0023601	-0.0204038	0.0021337	0.00776881	-0.00044891	-0.422405	-0.0636917	0.0457894	0.0335128	-0.038885	-0.0106704	0.023205	-0.00107743	-0.00978299	0.00488045	-0.00952899	0.0978798	-0.0340841	0.0274319	-0.0180557	0.0207822	-0.000245221	-0.00286562	0.00446063	-0.00233284
Micromelerpeton_credneri	-0.0151289	-0.0272506	0.0161918	0.00270798	0.00221154	-0.00365179	0.00209546	-0.00162463	-0.00226478	0.00387594	1.54232	0.00477972	-0.158897	0.00595547	0.0555181	-0.00892867	-0.0250417	0.001218	0.0187737	-0.00464761	-0.26466	-0.0845454	0.0605996	0.0189907	0.00682702	-0.0190416	0.00653462	0.00771174	-0.0169675	0.00166445	-0.00374702	0.0704843	0.0100322	0.00966443	-0.00249546	-0.0220431	0.00863761	-0.0056031	0.00692296	0.00209184
Milleropsis_pricei	-0.0201843	-0.0196751	0.0185186	0.00957798	-0.0126173	-0.00480815	0.00831718	0.00557274	-0.0068361	-0.00571741	1.55875	0.0238433	-0.169443	-0.0130328	0.0529921	0.00906937	-0.0260494	-0.00538906	0.0108557	0.00591257	-0.242894	0.036459	0.0233382	-0.00694226	-0.0125833	-0.0124347	0.0144053	0.00426438	-0.00505725	-0.00298513	-0.0064553	0.0891946	-0.0366116	0.0229768	0.000340447	0.00672195	0.00146336	0.00224933	0.00473823	-0.00272798
Moradisaurus_grandis	-0.0172113	-0.00795656	0.0136478	-0.00684778	-0.000296449	-0.00209927	0.00858761	-0.00380215	-0.00250793	-0.00198479	1.54605	0.0239155	-0.173409	0.00296268	0.053765	0.00287659	-0.0228761	0.000257283	0.0133114	-0.00103175	-0.269204	-0.0547116	0.046215	-0.02212	-0.0297993	-0.0042399	0.0347545	-0.001069	-9.19356e-05	-0.00565932	-0.00808171	0.0309253	-0.0224465	0.0344842	-0.0214364	0.0138891	0.00263292	0.00193335	-0.00138616	-0.0104665
Moschognathus_whaitsi	0.0183222	-0.0471245	0.00561141	0.0147081	-0.0102666	-0.00349902	0.00619987	0.0044507	-0.00584464	-0.000532738	1.41676	0.0145098	-0.113769	-0.000837627	0.0335498	0.00138516	-0.0124271	0.00229987	0.0048289	-0.000842133	-0.502777	0.119411	0.128752	0.0222152	-0.011812	-0.0176932	0.000750311	-0.00797301	-0.0076298	0.00153858	0.00308761	0.0907094	-0.0753422	0.0340832	0.00522736	-0.00460761	-0.0136117	-0.0102365	0.0130951	0.00337743
Moschops_capensis	0.0392764	-0.0411005	-0.011512	0.0169271	-0.00799786	-0.00639767	0.00256323	0.00358597	0.000731798	0.0001498	1.43278	0.00020884	-0.112392	-0.00586956	0.0284329	0.00859475	-0.00812676	-0.000300458	0.00548601	-0.00318662	-0.516607	0.128742	0.15399	0.0158109	-0.0321056	-0.0136976	-0.00485524	0.0186759	-0.00726609	-0.002981	0.0090893	0.101147	-0.0407692	-0.00182949	0.00448254	-0.0241935	-0.00170648	0.00417632	0.00101262	-0.000360071
Mycterosaurus_longiceps	-0.00173106	-0.0169632	-0.00905663	0.00319042	0.00380758	-0.00109007	3.29331e-05	0.00167833	-0.00293214	0.000100384	1.53571	0.0157192	-0.163214	-0.00222423	0.0528901	0.000696541	-0.0265784	0.000575759	0.0150732	-0.000280534	-0.299948	-0.0633821	0.0484262	0.0102118	-0.0144083	-0.00604931	0.0082021	0.00383442	-0.00623887	-0.00302025	-0.00488093	0.0589036	-0.0192156	0.000249441	0.0111831	-0.004127	-0.00969409	0.00498126	0.00252515	0.000202141
Nagini_mazonense	-0.0227439	-0.0349457	0.0512496	0.0154997	-0.021801	-0.0193158	0.00642622	0.0166066	-0.00499662	-0.0110352	1.4675	0.085173	-0.131579	-0.0174271	0.0201889	0.0135568	-0.0100801	-0.00410987	-0.00208048	0.000191363	-0.439461	-0.0221365	0.0773168	0.0156072	-0.0126681	-0.015447	0.0266363	0.00371179	-0.00831513	0.00559595	-0.027356	0.109686	-0.0829615	0.016523	-0.00919295	0.00107467	0.00457224	0.00489453	0.00463325	-0.0104775
Neldasaurus_wrightae	-0.0300931	-0.0159697	0.0100464	0.00645475	-0.00260412	-0.00239919	0.00163842	0.000863858	-0.00189634	0.000140538	1.54027	0.00351043	-0.156512	0.0042011	0.0540147	-0.00566534	-0.0263206	0.00295856	0.0161053	-0.00160313	-0.261715	-0.0841063	0.0648189	0.017577	-0.00531704	-0.0057884	-0.00306014	0.00686881	-0.00781117	-0.00756294	-0.00470001	0.0633391	0.0109881	-0.00353002	0.000760702	-0.01555	0.00256745	-0.000391225	0.000668315	0.001973
Neopteroplax_conemaughensis	-0.0196293	-0.0227252	0.0176145	0.0145058	0.00569119	-0.0127991	-0.004003	0.00876105	0.00184517	-0.00573275	1.47741	0.00213154	-0.116681	0.0100892	0.0310351	-0.0101146	-0.0116531	0.00866469	0.00726463	-0.00724672	-0.355606	-0.228548	0.0946592	0.0438688	-0.0339501	-0.01711	0.0188439	0.00160914	-0.00995078	0.00190451	-0.0136594	0.128531	-0.0125573	-0.0104063	0.0103122	-0.0111718	-0.00172413	0.00229888	0.0026158	-0.00148358
Niassodon_mfumukasi	0.00408358	-0.021201	-0.0134078	0.00965401	0.00541078	-0.0157654	-0.00102557	0.00960662	0.00495656	-0.0131042	1.42525	0.00878579	-0.144959	0.0119384	0.0317923	0.00192832	-0.00457748	0.000177354	0.00755726	-0.0028806	-0.492714	0.153675	0.024503	0.0235104	-0.0151593	0.0511635	0.0113343	0.00273891	-0.00531618	0.000742679	-0.00391951	-0.0722046	-0.0565695	-0.019976	0.0685376	0.0320143	-0.00648045	-0.0247079	0.00976558	0.00104678
Nochelesaurus_alexanderi	0.215222	-0.105564	-0.13178	0.00449848	0.0342443	-0.00910949	-0.00969852	0.00335806	-0.00353061	-0.0196988	1.363	-0.112327	-0.104531	0.0380353	0.0243584	-0.0110373	-0.00613484	-0.00340095	-0.00557285	0.00464897	-0.546377	-0.0223476	0.0602244	0.05483	0.00906222	0.0199343	0.031013	0.00256647	-0.000717439	0.000789563	0.0930434	0.0891733	0.00557176	0.0858177	0.0661738	-0.0228807	-0.0189467	-0.0112591	-0.0148235	-0.00164773
Odontocyclops_whaitsi	0.016246	-0.0158817	-0.00984552	0.00726403	0.00793611	0.00187633	-0.0065355	-0.00550458	0.00155045	0.00493199	1.36014	-0.0617267	-0.0846642	0.0330608	-0.000571907	-0.0350524	-0.00635912	0.0100168	0.000471641	-0.00538399	-0.578311	0.011039	0.052588	0.0470781	-0.0139838	0.0281108	-0.00219814	-0.0413873	-0.00911311	0.0207246	-0.018397	-0.0916953	-0.144722	0.0030345	0.000485526	-0.0434397	-0.0252757	0.0143589	0.0129297	0.00964408
Oestocephalus_amphiuminus	-0.00718291	-0.0457495	0.0128409	0.0272017	-0.0077765	-0.013264	0.0108908	0.00721137	-0.00947501	-0.00182116	1.54524	0.00167948	-0.132761	-0.00317511	0.0380065	0.00826055	-0.0158389	-0.00732449	0.0126605	0.00403072	-0.245353	-0.134808	0.0780408	0.0360171	-0.0189626	-0.0130907	0.0135805	-0.000381865	-0.0086154	-0.000485298	-0.00303793	0.08332	0.0320119	-0.00693142	-0.00346629	-0.00690141	-0.00495452	0.00328012	0.00454876	-0.00839316
Onchiodon_labyrinthicus	-0.0276159	-0.0133972	0.0124927	0.00596503	-0.00288841	-0.000628312	0.000646712	0.000477198	-0.00233498	0.00013279	1.53215	-0.00916897	-0.160618	0.00463627	0.0582703	-0.00576482	-0.0289741	0.00371391	0.017318	-0.00170892	-0.285352	-0.0553627	0.0464289	0.00187195	-0.00671149	0.00276991	-0.000783665	0.00363516	-0.00691894	-0.00204029	-0.00093906	0.0721273	0.0268256	-0.00231813	-0.000550155	-0.0154502	0.00356097	0.00434151	-0.00663939	0.00267905
Ophiacodon_uniformis	-0.00891658	-0.0128501	0.00769269	0.00490311	-0.0026411	-0.00723925	0.00248091	0.0051715	-0.00215607	-0.00233875	1.53926	0.0155239	-0.151645	-0.00373732	0.045374	0.000813394	-0.0183025	-0.0024013	0.0118454	0.000761407	-0.250466	-0.0756697	0.0741669	0.0339552	-0.00751463	-0.025065	0.00629036	0.0142729	-0.00876475	-0.00927883	-0.0101015	0.101792	-0.0448984	-0.00935244	0.0132117	-0.0161843	0.0023062	0.00299143	-0.00209921	-0.00557879
Orobates_pabsti	-0.0155154	-0.00595386	0.0111434	-0.00102638	-0.0054732	8.18572e-06	0.00500083	0.000312214	-0.00540122	0.000498107	1.51061	0.0145984	-0.16059	-0.00204923	0.051281	0.000882218	-0.0256081	-0.000271501	0.0148734	0.00120549	-0.313759	0.0226342	0.0690613	0.0201574	-0.0208006	-0.00237152	0.0109329	-0.00167358	0.00193302	-0.0024938	-0.00467326	0.0366844	-0.0262028	0.0297366	-0.00821474	0.00654135	-0.00863234	0.00363334	0.00300554	0.0065211
Orovenator_mayorum	-0.0262404	-0.013231	0.0114304	-0.000199582	-0.00404009	4.65299e-05	0.00141298	0.00170436	-0.00221154	-0.000241261	1.5912	0.0076465	-0.17264	-0.00191838	0.062609	-0.000857773	-0.0305959	0.000496684	0.0177225	0.000849662	-0.131304	-0.0734044	0.0479469	0.0073905	-0.0132287	-0.00477074	0.00353062	0.00625068	-0.00885754	-0.00323019	-0.00227411	0.0363221	0.0158676	-0.00965968	0.00110663	-0.00163376	0.00320903	0.001826	-0.00448799	0.00328295
Oudenodon_bainii	-0.0185514	-0.00883718	0.00179789	0.00299262	-0.00533611	0.00700133	0.00899374	0.00188563	-0.00284759	-0.00225504	1.44628	-0.0213875	-0.122282	0.0188952	0.0309346	-0.0133064	-0.0120754	0.00900384	0.00145	-0.00959123	-0.487431	0.0528985	0.0885637	0.0338893	-0.0264532	0.0118523	0.0283401	0.00952482	-0.0227501	0.000145209	-0.0222203	-0.0527522	-0.0805427	-0.018728	0.0328077	0.0052637	-0.00069245	-0.019459	-0.00522831	-0.00491347
Owenetta_sp	-0.0177175	-0.0168662	0.0234199	-0.00348454	-0.00887647	-0.000778753	0.0104564	-0.00497503	-0.00372652	0.000361945	1.54544	0.0390801	-0.168129	-0.0106744	0.0533489	0.0106405	-0.0289027	-0.00356715	0.0164078	-0.000158514	-0.263887	-0.028668	0.0393611	0.0232844	-0.0326268	-0.00281872	0.00437108	0.010292	-0.00110877	-0.0149304	-0.00566763	0.00750646	-0.0295833	0.0215922	-0.00112185	-0.0077757	-0.00979249	0.020391	-0.0142015	0.00391757
Palaeohatteria_longicaudata	-0.0100063	-0.0187685	0.00822911	0.00611258	-0.00249672	-0.00262447	0.00308194	-0.0015602	-0.00222426	0.000881154	1.51122	0.0156758	-0.155327	-0.000179036	0.0484218	0.000158871	-0.0244253	0.0013322	0.0149178	-0.000651745	-0.343004	-0.0126476	0.0810216	0.00963524	-0.00379863	-0.0161453	0.013993	0.00382643	-0.0138344	0.0013035	-0.00767501	0.114338	-0.04524	0.0154186	0.00496879	-0.0119448	-0.00495382	0.000785432	0.00657337	0.000349133
Pantelosaurus_saxonicus	0.0488592	-0.070782	-0.0394549	0.0332168	0.0293446	0.00257903	-0.0174602	-0.00496584	0.00243266	-0.00560161	1.44854	0.00570359	-0.121109	0.0227497	0.0428048	-0.0146276	-0.0310551	0.00441999	0.0139012	0.00313484	-0.432092	0.0480618	0.00294168	0.0231051	-0.00160725	0.0127743	0.0255152	-0.00618631	-0.0244192	-0.00504138	0.00829299	0.10578	-0.0539263	0.0615445	0.0342215	-0.00588757	-0.0274042	-0.0128158	0.0092971	0.0110013
Pantylus_cordatus	0.0127364	-0.0499611	-0.0041823	0.0370333	0.00721508	-0.0219812	-0.00585663	0.00772863	0.00395767	0.00336724	1.4969	-0.000833984	-0.117933	0.00437509	0.0250994	-0.00697215	-0.0127231	0.00707646	0.0130205	-0.00509149	-0.408666	-0.0473302	0.0820658	0.0125867	-0.0199331	-0.0127996	0.00594934	0.00858894	-0.00475143	-0.00162866	0.0028203	0.0740317	0.0118194	-0.0159073	0.00646398	-0.00104515	-0.0039185	0.0125325	-5.02198e-05	-0.00579574
Parrsboro_jaw	-0.0233079	-0.0156769	0.00507002	0.00888818	0.00399019	-0.00255994	-0.00278607	-0.00222816	-0.000204753	0.00335696	1.50592	-0.00862137	-0.136376	0.00920343	0.0371891	-0.0072696	-0.0147715	0.0048346	0.00628227	-0.00295834	-0.333385	-0.136523	0.078721	0.0232877	-0.0307814	-0.00599565	0.0183155	0.0054792	-0.0165075	-0.00363883	-0.00193271	0.0580996	0.0279908	0.0273442	-0.0202556	-0.0255628	0.0101789	0.0111912	-0.00620838	-0.00244353
Patranomodon_nyaphulii	0.050781	-0.0357481	-0.0314566	0.0108975	0.00352527	-0.00885995	0.000937625	0.00831739	-0.000921332	-0.00613839	1.46735	-0.0369852	-0.127647	0.0181633	0.0352032	-0.00265442	-0.00710925	-0.000626486	-0.00180811	-0.00154803	-0.441135	0.147275	0.0875999	0.00460479	-0.0303067	0.0301991	0.0282239	0.00748941	-0.0146139	-0.00744281	0.0176449	0.0283453	-0.0200375	0.0379635	0.0428276	-0.00214411	-0.0288379	-0.0187968	-0.0030208	0.00154211
Perplexisaurus_foveatus	0.015127	-0.0242792	-0.011781	0.00814711	0.0175866	0.00640263	-0.00475464	-0.00157618	-0.00166645	-0.00216657	1.51207	-0.0173722	-0.120113	0.0092386	0.0403099	-0.0093418	-0.0228706	0.00602779	0.0152256	-0.00164175	-0.318988	-0.284561	0.114933	0.0316595	-0.047118	-0.00708775	0.0193662	-0.0204916	-0.0120877	0.00964609	0.00121684	0.0431203	0.0256674	0.0136491	0.0257596	-0.00659713	-0.0152949	0.00153726	0.00801053	-9.62177e-05
Petrolacosaurus_kansensis	-0.0150407	-0.0209677	0.0141455	0.0101916	-0.00244788	-0.0128623	0.0039691	0.00765778	-0.00107024	-0.00589747	1.55852	0.0285407	-0.164491	-0.00801717	0.0474623	0.00466851	-0.0187127	-0.00387431	0.00990621	0.00038048	-0.258514	-0.0189937	0.0969288	-0.00902525	-0.0221388	-0.0114921	0.0182994	0.00776607	-0.00716068	-0.00450115	-0.00750155	0.104592	-0.0289511	-0.0184241	0.0020548	0.000583431	0.00441735	-0.00236358	-0.00303258	-0.00389121
Pholiderpeton_attheyi	0.0100739	-0.0546022	0.0120061	0.0345109	0.000459937	-0.0196628	0.00252615	0.00523066	0.00351798	-0.00295599	1.43592	0.0150078	-0.109124	0.000280946	0.0242953	-0.00165726	-0.0140432	0.00436592	0.0128812	-0.00813581	-0.46404	-0.170405	0.0685711	0.0407564	-0.0207277	-0.0274603	0.0249624	-0.00363541	-0.00971733	0.0111604	-0.00473185	0.122368	0.0101914	-0.00601337	-0.00300465	0.00375764	0.00270796	-0.0106655	0.0157597	-0.00741683
Pholiderpeton_scutigerum	0.00963455	-0.0371501	0.00545654	0.0186855	0.0118593	-0.0135602	-0.00391418	0.00620615	0.00290364	-0.00533817	1.46075	0.00711931	-0.12636	0.0124978	0.0329468	-0.0117439	-0.0118035	0.00673217	0.00859871	-0.00647745	-0.426296	-0.202188	0.0790447	0.0321286	-0.0132986	-0.0319467	0.0260167	0.00302339	-0.0158694	0.00904107	-0.0105836	0.131771	-0.00299699	0.00853967	0.00140373	-0.00433094	0.000693744	-0.00892489	0.0112195	-0.00151247
Phonerpeton_pricei	-0.0150588	-0.0211527	0.0139332	-0.000819591	0.00313285	-0.00153837	0.000111916	0.00174947	-0.00516206	0.00168709	1.54242	0.0165613	-0.161382	0.000320027	0.0594816	-0.0074313	-0.022759	-0.0018068	0.0135006	0.000404041	-0.271785	-0.113087	0.0902038	-4.87229e-05	-0.00436048	-0.00445034	0.0120924	0.0100163	-0.0194375	-0.00241007	-0.00661619	0.0736364	0.00556825	0.00474698	0.00873986	-0.0133021	-0.00362355	-0.00262201	0.00483836	0.00315943
Phthinosaurus_borissiaki	0.0036438	-0.0292273	0.00584366	-0.00759653	-0.00103111	0.00436407	0.0041366	-0.00515468	-0.00447047	0.00413495	1.46639	0.0308001	-0.135818	-0.00781829	0.040619	0.000857175	-0.0173051	0.00204026	0.010273	-0.0049893	-0.42354	-0.011258	0.117437	0.00158049	-0.0187777	-0.0233007	0.0116774	-0.00570937	-0.00445843	0.0068087	-0.00817609	0.0626449	-0.0820981	0.0278672	-0.0129074	-0.0291352	0.00312496	0.000259369	0.0159166	0.00685592
Pointedward_jaw	-0.00920534	-0.037609	0.00799185	0.0177163	0.0103127	-0.0149789	-0.00618098	0.00920476	0.00243517	-0.00326399	1.46829	0.00424817	-0.129585	0.0086392	0.0325983	-0.0118203	-0.00642104	0.00495196	0.00233085	-0.00446254	-0.412783	-0.1403	0.10185	0.00517716	-0.0212701	-0.0118494	0.0149534	0.00846483	-0.0164928	-0.000827201	-0.00860662	0.127021	0.00957276	-0.0110223	0.00731226	-0.00629316	-0.000999654	-0.000325275	0.0115493	-0.0044111
Proburnetia_viatkensis	0.0199524	-0.0331353	-0.0257592	0.00899145	0.0110594	-0.00633761	-0.00693931	0.00544787	0.00912361	-8.60649e-05	1.49139	0.00603372	-0.121973	0.012025	0.0193438	-0.00772889	-0.00262353	0.0204879	0.00646665	-0.0143436	-0.381584	-0.000901377	0.135716	0.0742013	-0.00753098	-0.0192395	0.00226418	0.000865275	0.000737849	0.00406046	-0.00137057	0.119467	-0.0927188	0.0226803	0.00520982	-0.0354444	-0.0128984	0.0127822	0.00572962	-0.00668187
Procynosuchus_delaharpeae	0.0242256	-0.071594	0.00324347	0.0210528	0.00672526	-0.0156312	-0.00117844	0.0105753	0.00504358	-0.0111865	1.50608	0.0303899	-0.133202	0.00395243	0.0380576	-0.000904406	-0.0172485	0.00452385	0.00436342	-0.00235101	-0.335011	-0.00682622	0.115979	-0.0323858	-0.0211912	-0.0181564	0.0227071	0.00352507	-0.00799594	-0.00354231	-0.00296302	0.109468	-0.0977962	3.81864e-05	0.0105194	0.010489	0.00413104	-0.0100986	-0.010649	-0.00621024
Protocaptorhinus_pricei	-0.0403177	-0.0206362	0.0330654	0.00883224	-0.0107873	-0.00549889	0.0135912	0.00311348	-0.00767526	-0.00301639	1.49991	-0.00301172	-0.158809	0.000779688	0.051316	0.00549505	-0.0202485	-0.0027352	0.0109877	3.50102e-05	-0.363651	-0.0375189	0.0606129	-0.0416129	-0.0184017	-0.00121758	0.0159497	0.00365331	-0.00911268	-0.000189108	-0.0118397	0.0865357	-0.0192849	0.00655397	0.00890387	-0.00650283	0.00105638	-0.00114804	-0.00301094	8.33609e-05
Protorothyris_archeri	-0.0215884	-0.016448	0.0109869	0.00990813	-0.00640112	-0.00863432	0.00479663	0.00556951	-0.00377237	-0.00374648	1.54158	0.0151538	-0.160904	-0.00493776	0.0493892	0.00345181	-0.0219259	-0.00217616	0.0122893	0.00101389	-0.279677	-0.0200687	0.0669966	0.00453682	-0.0186016	-0.0134684	0.00924585	0.0094327	-0.0030223	-0.00285763	-0.00965306	0.093938	-0.0400191	0.000451468	4.68694e-05	-0.00996593	0.00608776	0.00444389	-0.00150913	-0.00653098
Purlovia_maxima	0.038523	-0.0385446	-0.0175139	0.0153583	-0.0235241	-0.00296711	0.0114353	0.0184364	-0.0116278	-0.00954201	1.40009	0.0436923	-0.124149	0.00500967	0.0193114	0.0146399	-0.00798625	-0.00271472	-0.00294294	-0.00142547	-0.518791	0.107775	0.0947379	0.0522723	-0.0568636	-0.0195117	-0.0246004	-0.0146947	-0.00387907	0.00629701	0.00185003	0.0583443	-0.17642	0.027136	-0.0162783	-0.00976353	-0.00837022	0.00792275	-0.00545323	0.00168427
Rastosuchus_hammeri	0.00409066	-0.0192253	0.00787737	0.0124375	-0.00245366	-0.00348558	0.00149116	-0.00208048	0.00125448	0.000773219	1.54934	0.000862091	-0.149405	0.00338371	0.0454469	-0.000490021	-0.0218913	0.00289979	0.0140876	-0.00295826	-0.318749	-0.110628	0.0592673	0.0374333	-0.0212102	-0.0231191	0.0170234	0.00157738	-0.00662056	-0.00527619	0.00219767	0.077085	0.0139748	-0.00666945	-0.00262553	-0.00245967	-0.00489085	0.000564216	0.00879808	-0.00315449
Reiszia_gubini	0.000223536	-0.0243336	-0.00915345	0.0146288	0.00433775	-0.0118833	-0.00342368	0.00438502	0.00532739	0.00108553	1.55001	0.00325828	-0.149576	0.00264265	0.0490525	-0.00455412	-0.024862	0.00662982	0.0175528	-0.00495196	-0.255396	-0.0505901	0.0928524	0.0294012	0.00739422	-0.00858015	-0.0110659	-0.000288086	-0.000670727	-0.0049326	-0.00405983	0.09084	-0.0403685	-0.0213597	-0.00944301	-0.0225646	-0.00518292	0.00364018	0.000714032	-0.00110845
Rhachiocephalus_magnus	-0.02396	0.00689885	0.0146699	-0.000696686	-0.0125071	0.00233652	0.0108321	0.000120194	-0.00627273	0.000977196	1.45052	-0.0155529	-0.135041	0.00355168	0.0295864	-0.00445737	-0.00908943	0.000773019	0.00186931	-0.00273612	-0.445699	-0.00433824	0.0778598	0.0229886	-0.0248052	0.0116777	0.0285966	-0.00032397	-0.0105303	-0.00153835	-0.0118679	-0.0451198	-0.0658529	-0.0291276	0.0204093	-0.00714574	-0.0220548	-0.00694677	0.00439351	-0.00363063
Rhinesuchus_whaitsi	-0.0139552	-0.0241206	0.00578322	0.0164404	0.00122421	-0.00704595	-0.00114196	0.00405479	0.00256343	-0.00301665	1.50859	-0.00134824	-0.130436	0.00754748	0.0372528	-0.00750851	-0.0198324	0.00667407	0.0106719	-0.00393945	-0.318473	-0.142861	0.0878825	0.0611747	-0.032269	-0.016696	0.0156483	-0.00531075	-0.0113289	-0.00266519	-0.00583605	0.0789799	0.0136975	-0.0192974	0.00487185	-0.0085253	-0.00462119	0.00385037	0.00356417	-0.00101786
Rhodotheratus_parvus	-0.020934	-0.0203619	0.0101621	0.00817067	-0.00783263	0.00368642	0.00815486	-0.00316752	-0.00401404	0.000489924	1.49344	0.0239635	-0.160484	-0.000975104	0.0529081	0.00458683	-0.0295751	-0.000614243	0.0151256	0.00147709	-0.371417	-0.0207449	0.0222762	0.00923427	-0.00612992	-0.00513305	0.0123709	0.00135946	-0.0103651	-0.00142315	-0.0113502	0.0833765	-0.0374659	0.0487888	-0.000925842	-0.00855565	-0.00511627	0.00331152	-0.000862109	-0.00176002
Sauroctonus_parringtoni	0.0623728	-0.121116	0.0273001	0.0532773	-0.0527885	-0.009962	0.0303294	-0.0141634	-0.0105137	0.0123226	1.46396	0.0465557	-0.0491422	-0.0594691	-0.00480721	0.04423	-0.0109321	-0.0129683	0.016983	-0.0109371	-0.41033	-0.0207855	0.161759	0.0466188	-0.0309304	-0.00595378	0.0173163	0.0201659	-0.0092176	-0.00418898	0.00649069	0.0894282	-0.0726781	0.0458336	0.0235996	-0.0331912	0.000246739	-0.0116388	-0.0163238	-0.0022455
Sauroctonus_progressus	0.097994	-0.18982	0.136635	-0.0874888	0.0669085	-0.0621928	0.0288262	0.00132933	0.0158674	-0.00731797	1.4113	0.4434	-0.246002	-0.0550011	0.0221863	0.0300289	0.0320201	-0.0287586	0.00303483	-0.00264934	-0.455706	-0.0824423	0.0404113	0.13112	-0.0536079	0.00388245	-0.0101843	0.0198398	0.00775284	0.0024982	0.0224059	0.0242658	0.0610746	-0.0516234	0.0669394	0.0235791	-0.0179328	-0.0105782	-0.00623492	-0.01351
Sauropleura_scalaris	-0.0304454	-0.0156487	0.0123797	0.00876984	-0.00621086	-0.00618249	0.00400873	0.00519189	-0.00452007	-0.00366639	1.55609	-0.00809149	-0.164663	0.00194121	0.0534836	-0.00373464	-0.0247636	0.00155407	0.0135753	-0.000306446	-0.229347	-0.042448	0.0652373	0.0101423	-0.0222525	-0.00346737	0.00733162	0.00347433	-0.00892854	-0.000334234	0.000155471	0.104782	0.0347808	-0.0153345	0.00747612	0.00163897	0.00178	-0.00299255	0.000687422	0.00231711
Sclerocephalus_haeuseri	-0.0164195	-0.0245501	0.0115604	0.00527594	0.0039459	-0.00512196	0.000581836	-0.000661348	0.00134513	0.000440458	1.53908	0.00570299	-0.160973	0.00558168	0.0500443	-0.00699674	-0.023492	0.00489616	0.0172582	-0.00554431	-0.284189	-0.0606101	0.0716035	0.0231457	-0.00419145	-0.02879	0.0106613	0.00519669	-0.0103992	-0.00196018	-0.00449809	0.0928011	0.00696378	0.00853026	-0.0141872	-0.0112116	0.00685408	-0.00413625	0.005018	-0.00198085
Scutosaurus_sp	-0.0750712	0.0686108	0.0429284	-0.0267766	-0.00968061	0.00463234	-0.017721	-0.0144344	0.00206419	-0.00144199	1.24161	-0.241604	-0.134173	0.03904	0.0325866	0.000490772	-0.00325332	0.00824189	0.0146766	-0.00401676	-0.722695	-0.106515	-0.0344679	-0.116612	-0.0245082	0.00723872	-0.0114918	-0.00768166	0.00233741	-0.00125216	-0.0502769	-0.0590017	-0.0364648	-0.0354076	-0.0533827	-0.013982	0.00778212	-0.020969	-0.00803482	0.00301382
Scylacosaurus_sclateri	0.00252469	-0.0329875	0.00309795	0.0207683	0.0103962	-0.0208773	-0.00993339	0.0122742	0.00888847	-0.00579292	1.51328	0.0067067	-0.127372	0.0196867	0.0300478	-0.0201437	-0.0121465	0.0190385	0.00567973	-0.0141398	-0.388123	-0.125569	0.144403	0.0408769	0.0019791	-0.00923615	-0.00126474	0.000834183	-0.00261481	-0.00106947	-0.0103187	0.0784189	-0.0390355	-0.00864054	-0.0120858	-0.0150503	0.0142254	0.0108715	-0.00200509	0.00557676
Secodontosaurus_obtusidens	-0.00357632	-0.0374239	0.00096821	0.0208027	0.00824009	-0.011931	-0.00809769	0.00481377	0.00715757	-0.000477234	1.55591	0.00604112	-0.144742	0.0105068	0.0403245	-0.0111487	-0.0208152	0.00967596	0.0166442	-0.00671419	-0.246342	-0.0194699	0.0655467	0.0122908	0.00724761	-0.00960497	-0.000334587	-0.00604829	-0.00692719	0.0107205	-0.00901747	0.081388	-0.0835027	0.00929949	0.0110306	-0.0211257	-0.00674152	0.0062658	0.0141093	-0.00432782
Seymouria_baylorensis	-0.00944637	-0.0161608	0.0110527	0.000930782	-0.000208491	-0.00399547	0.000504723	-0.000699083	0.00280769	-0.00245296	1.47315	0.014541	-0.1488	0.00280614	0.0446417	-0.00274876	-0.0195644	0.002445	0.0100524	-0.00608452	-0.405778	-0.0640088	0.0590003	0.0171351	-0.0144744	-0.0215995	0.0307904	0.00653322	-0.0099376	0.0022159	-0.00966102	0.108461	-0.035527	0.023829	-0.00140018	-0.00743744	0.0135163	0.0041828	0.00491404	-0.00697435
Shihtienfenia_permica	-0.0135683	-0.0122769	0.00840136	0.0121487	-0.00415837	-0.00638685	-0.00318964	0.00695954	0.00517362	-0.00795423	1.44919	0.0121434	-0.120362	-0.0107826	0.0247265	0.00780199	-0.00205771	-0.00653059	-0.00489282	0.00428272	-0.451797	0.0531019	0.106194	-0.00512165	-0.0418709	-0.000192044	0.0126362	0.00150005	-0.00318553	0.0041016	-0.00474797	0.0448402	-0.0169393	0.00101858	-0.00834895	-0.00986222	0.0142413	-0.00487737	-0.00380864	0.00371837
Sigournea_multidentata	-0.0192938	-0.00363935	0.0064435	0.00311528	-0.0048265	-0.00184683	0.00375131	0.00156961	-0.0028055	-0.000901474	1.54633	0.00205853	-0.16455	-0.00165706	0.0542829	0.00232896	-0.0260298	-0.00181967	0.0147706	0.00127607	-0.248312	0.0310402	0.0612848	-0.00215997	-0.0287423	-0.000963684	0.0120056	0.00208488	-0.0092779	-0.00357415	-0.00189265	0.0455944	0.0116893	0.00743801	-0.00744035	-0.00335017	0.000180059	0.000710721	0.000119669	0.000698564
Silvanerpeton_miripedes	-0.0227715	-0.0116022	0.00668087	0.00928059	0.000248982	-0.00760005	-0.00130703	0.0048554	0.000982247	-0.00428186	1.52795	0.00242328	-0.160333	0.00312244	0.052848	-0.00258686	-0.023078	0.00271126	0.0125049	-0.00339994	-0.304937	-0.0454226	0.0622029	0.00540546	-0.0197112	-0.00655796	0.0146626	0.00567641	-0.00623219	-0.00275082	-0.00629795	0.0822782	0.0147701	-0.0110619	-0.0087389	-0.000297946	0.00438702	0.00029769	-0.00218232	-0.000853148
Solenodonsaurus_janenschi	-0.0115116	-0.0170546	0.0104252	0.00121113	0.00146203	-0.00348018	0.00118338	0.000664195	0.00124814	-0.00132136	1.54232	0.0203486	-0.159586	-0.00314688	0.0507179	-0.0016341	-0.0220076	0.00228232	0.0106795	-0.00460876	-0.285178	-0.0273217	0.0777691	0.0204972	-0.0250672	-0.0262827	0.0224303	0.00368003	-0.00828613	-0.00190441	-0.00545015	0.052463	-0.0126904	0.0145154	-0.0166104	-0.00682245	0.00959678	0.0019207	0.00157788	-0.00381047
Sphenacodon_ferox	0.034499	-0.0381367	-0.00556217	0.00804628	0.00891271	-0.00536619	-0.00502382	-0.00285911	0.00398248	0.000569781	1.45209	0.0420816	-0.131124	-0.00562103	0.0286403	0.00349818	-0.0148798	-0.00212349	0.0133596	0.00141501	-0.465234	-0.000793148	0.0947685	0.032812	-0.00416573	-0.0159896	0.014059	-0.00101096	-0.0063517	0.00166654	-0.00423172	0.156449	-0.0903072	0.0299088	0.0153992	-0.0176522	-0.0133913	0.00195194	0.0103164	0.000819929
Spinarerpeton_brevicephalum	-0.032095	-0.0135466	0.0185361	0.00798982	-0.00780457	-0.00406663	0.00436695	0.00355994	-0.00281077	-0.00237563	1.51912	0.01271	-0.154293	-0.00467007	0.0494787	0.000684341	-0.0195968	-2.40362e-05	0.00855899	-0.000881982	-0.326731	-0.0355125	0.084733	-0.00338852	-0.0305219	-0.00613577	0.0153537	0.00885466	-0.0138934	-0.00466558	-0.00805836	0.0805602	-0.00969716	-0.0123364	0.00717818	-0.0106098	0.00329058	0.00420756	-0.00425884	0.00102601
Stenokranio_boldi	-0.0163476	0.00140298	0.0170805	-0.0140186	0.00475156	0.00443491	0.0013649	-0.00253285	-0.00457359	0.00571536	1.51218	0.0165004	-0.149516	0.00390228	0.0511487	-0.00852471	-0.0166594	0.000635489	0.0115257	-0.00229872	-0.29943	-0.178517	0.0406142	0.0379415	-0.00995968	-0.0228476	0.00959448	0.0155929	-0.0120713	-0.00539111	-0.0136428	0.0815027	-0.0376359	0.00174365	0.0244436	-0.0149882	-0.00405281	-0.00544854	0.0079013	0.000162135
Suchogorgon_golubevi	0.0967602	-0.1312	0.0234254	0.0425744	-0.0442262	-0.00103386	0.0164246	-0.0132808	0.00306474	0.00075746	1.45225	0.0477901	-0.0602638	-0.0560577	0.0197632	0.0339856	-0.031682	-0.000724927	0.0269272	-0.00883799	-0.467627	-0.0458894	0.14946	0.0594394	0.00289639	-0.025858	-0.00426616	0.00793823	-0.0162421	0.00863793	0.0119964	0.137222	-0.0868834	0.0263039	0.0087489	-0.032699	-0.00347907	-0.00979566	-0.00638932	0.00470117
Suminia_getmanovi	0.0465465	-0.0514508	-0.0283976	0.0124549	0.00720427	-0.00593141	-0.00188021	0.00507454	0.00313466	0.00377797	1.45549	-0.0160179	-0.110588	0.0285157	0.0313424	-0.0107922	-0.0135871	0.00840081	0.0105986	-0.005461	-0.418425	0.172265	0.110899	0.0160404	-0.0223919	0.00220591	-0.0218612	-0.0147765	0.00441606	0.0104248	0.0191954	0.02984	-0.0433159	0.0430916	-0.0143671	-0.0342065	-0.0446477	0.00927991	0.0212408	0.0107542
Syodon_efremovi	-0.00832498	-0.0299003	0.0126883	0.00991913	-0.0150712	-0.00409851	0.0174316	-0.000140949	-0.0132011	0.0011251	1.49396	0.0121102	-0.121911	-0.00514197	0.0275325	0.0081289	-0.0111655	-0.00527997	0.005645	0.00157134	-0.369232	-0.0128867	0.136731	-0.0195001	-0.0513608	-0.0102	0.00672428	0.00258629	0.00162706	-0.000725788	-0.00923464	0.0718904	-0.081986	0.00823962	0.0227306	-0.0246497	-0.0084983	0.0165081	0.00429592	0.00707122
Tapinocaninus_pamelae	-0.0392967	0.00307029	0.0104041	-0.00569486	-0.00309332	8.4789e-05	0.00513787	1.03315e-05	-0.00375843	-0.00157603	1.47048	0.00179364	-0.135609	0.0109611	0.032243	-0.00620371	-0.0151585	0.00911237	0.00767691	-0.00379815	-0.452981	-0.0659399	0.0832539	0.0284795	-0.0417527	-0.0160438	0.000541542	-0.0117472	-0.00728932	0.00225108	-0.0154198	0.0372667	-0.0615168	0.0133553	-0.00381405	0.00142309	-0.0106142	0.00325843	-0.00202378	0.0109354
Tetraceratops_insignis	0.0241036	-0.0385687	-0.0255923	0.0189276	0.0179674	-0.00941792	-0.00664027	0.00704191	0.00382094	-0.0103245	1.46664	0.0171878	-0.116547	0.0217839	0.0250012	-0.00397763	-0.013309	0.000651794	0.00196765	7.20948e-05	-0.387376	-0.0847402	0.0346313	0.0345721	-0.0310125	-0.0146734	0.0286688	0.008569	0.00123645	-0.00639161	-0.00990557	0.13566	-0.108696	0.0220227	0.0250138	0.0108484	-0.00897319	0.00504415	0.000888875	-0.0133272
Titanophoneus_potens	0.0153562	-0.0278449	0.00173962	-0.0065008	-0.00752759	0.00133562	0.0108102	0.00159845	-0.00941522	-0.00171071	1.49212	0.0197169	-0.1301	-0.00844957	0.03838	0.00644961	-0.0169324	-0.000270515	0.00882338	-0.00125331	-0.373475	-0.0197901	0.131105	-0.000273218	-0.0298802	-0.0163094	-0.00183892	-0.00653226	-0.0118258	0.0069043	-0.00595341	0.0606149	-0.105654	0.0236768	0.0165148	-0.0333897	-0.00374743	-0.000814773	0.00466658	0.0146663
Tramuntanasaurus_tiai	-0.00140451	-0.0305316	0.0127606	-0.00228311	0.00124277	-0.000988049	0.00844041	-0.00146014	-0.00334317	-0.00269975	1.54589	0.0358515	-0.162273	-0.00296164	0.0503326	0.00483297	-0.0257717	-0.00454363	0.0119919	0.000807315	-0.280175	-0.0517722	0.0511309	0.00960871	-0.00618471	-0.0125809	0.0272049	-0.00724845	-0.0116597	0.00136695	-0.00786118	0.0755592	-0.0359669	0.0339543	-0.00144514	0.00134297	-0.00435584	-0.00930196	0.00758435	0.000233316
Trimerorhachis_insignis	-0.0197094	-0.0267435	0.0112531	0.0118741	-0.00471953	-0.00455446	0.00497735	0.00136968	-0.00551346	-0.00126495	1.53109	0.00332119	-0.139659	-0.00137871	0.0437462	0.00446235	-0.0193266	-0.00653281	0.0097216	0.00431503	-0.24776	-0.154738	0.0647174	0.0410831	-0.0269574	-0.00556836	0.0229084	0.00420357	-0.0171556	-0.00249966	-0.0041975	0.0646653	0.0204919	0.00376666	0.00642435	-0.00797417	-0.00996549	0.00212928	0.00605155	-0.00158522
Tseajaia_campi	-0.0136556	-0.00976245	0.00465522	-0.00243122	0.00510918	0.00347245	-0.00112323	-0.00381429	0.00147542	0.00216967	1.47331	-0.00488095	-0.142541	0.014554	0.0465268	-0.0115837	-0.0204419	0.00726161	0.0106047	-0.00608864	-0.394297	-0.111771	0.0551699	0.0282352	-0.0141109	-0.0183161	0.0239444	-0.0022808	-0.0113937	0.00304836	-0.00500378	0.0260864	-0.00479148	0.0332678	-0.00503535	-0.0106685	0.00370948	-0.00337295	0.00290201	-0.00626244
Ulemica_invisa	-0.0314342	-0.0354307	0.0234632	0.0141115	-0.0132551	0.00812395	0.0116686	-0.0044326	-0.00333675	0.00697215	1.39843	0.00324884	-0.103918	-0.00482498	0.0126513	-0.00258715	-0.00453971	0.00333394	-0.000799277	-0.00522957	-0.525842	0.0721217	0.11233	0.000889153	-0.0246824	0.00694904	0.0218554	-0.00455663	-0.00812891	0.00329845	-0.0225046	0.0086771	-0.142377	0.0246639	-0.00833265	-0.0253783	-0.00446911	-0.00909608	0.00808377	0.014094
Ulemosaurus_svigagensis	0.0134135	-0.0413704	0.0031171	0.0185844	-0.021458	0.000939857	0.0133711	-0.00177824	-0.00817144	0.00148173	1.39262	0.0314506	-0.117352	-0.0126493	0.0310722	0.00699389	-0.0192279	0.000910106	0.010135	0.00242123	-0.535537	0.0700288	0.0602981	0.0311253	0.00544874	-0.00449934	0.0113409	-0.000224516	-0.0117684	-0.00269121	-0.00158815	0.0510169	-0.0894233	0.0423613	0.0102249	-0.0194327	-0.0213941	-0.0128706	-0.00174044	0.00986091
Utegenia_shpinari	-0.0247605	-0.00899285	0.0117932	0.00275257	-0.00632828	-0.000979468	0.00388668	-9.44782e-05	-0.00209258	-0.00026591	1.51214	0.0144582	-0.158661	-0.0033099	0.0488965	0.00174414	-0.0224821	0.0012107	0.0100701	-0.00110385	-0.337499	0.00308992	0.0714074	0.0121497	-0.0246509	-0.0181313	0.0215004	0.00637593	-0.0117015	-0.00463579	-0.00838843	0.0634343	-0.0285304	0.0179884	-0.00792263	-0.00177651	-0.000129259	0.00241147	-3.28077e-05	-0.00173299
Varanops_brevirostris	-0.0279988	-0.0127983	0.00402108	0.00242116	-0.000347832	-0.00100104	0.000911538	0.000628696	-0.000949558	-0.000412182	1.54706	-0.00345963	-0.163175	0.00756518	0.0571846	-0.00625513	-0.0277331	0.00431826	0.0161721	-0.00406444	-0.259524	-0.122113	0.0410027	0.022672	-0.0132193	-0.00871004	0.0136056	0.00591389	-0.0100053	-0.00260446	-0.00411154	0.0460224	0.0275459	0.00171125	0.00858584	-0.000823587	-0.000530055	-0.00178083	-0.000275099	-0.00266149
Varanosaurus_acutirostris	-0.00929603	-0.00987634	0.00931282	0.00306252	0.00223946	-0.00685537	-0.00156059	0.00587916	0.00106196	-0.00288723	1.55127	0.00350771	-0.159305	0.00441238	0.0533657	-0.00731383	-0.0223382	0.00463863	0.0138158	-0.00509785	-0.220703	-0.122821	0.0688567	0.0236008	-0.0137892	-0.0170981	0.00835006	0.0122761	-0.00861682	-0.00424871	-0.00509566	0.0864084	-0.0140642	-0.0145664	0.00422526	-0.0045864	0.00629951	-0.0019822	-0.00386755	-0.00143574
Viatkosuchus_sumini	0.057888	-0.0769959	-0.0170599	0.0136637	-0.000532867	-0.00544293	0.00131494	0.00892561	0.00849639	-0.00423622	1.48048	0.0159021	-0.128644	-0.00228016	0.0428033	0.011191	-0.0144293	0.00212652	0.00670439	-0.00722447	-0.390513	0.0699028	0.11237	0.0148622	-0.00390195	-0.0405619	-0.00437771	0.00050489	-0.0116409	0.00741184	0.00929157	0.128807	-0.136426	0.00548562	0.00125808	-0.0182212	-0.00272391	0.00937942	0.0206816	-0.00359487
Weigeltisaurus_jaekeli	-0.0138843	-0.0373655	0.022671	0.0159406	-0.0172621	-0.00598585	0.00683991	0.00874361	-0.00437819	-0.0110848	1.55947	0.0136497	-0.150289	-0.0197009	0.0517166	0.00888084	-0.023091	-0.00208311	0.00650575	0.0033216	-0.214843	0.0337836	0.0701088	-0.0123679	-0.0252875	-0.00395516	0.0112147	0.0113012	-0.0134716	-0.00313524	-0.00424569	0.0569357	-0.0226644	-0.000587924	0.0148197	-0.00184569	-3.50749e-06	-0.00167378	-0.00135167	0.00658806
Westlothiana_lizziae	-0.0229531	-0.00993738	0.0124294	0.00765409	-0.00696365	-0.00528105	0.00449641	0.00239538	-0.00198171	-0.0017182	1.53348	0.0306107	-0.156946	-0.0161796	0.053181	0.00940247	-0.0252551	-0.00643041	0.0148726	0.00363286	-0.289036	0.0409468	0.0478478	-0.00776919	-0.0129993	-0.0122294	0.0113668	0.00748062	-0.00450892	-0.00466373	-0.00615473	0.0637824	-0.0152467	0.00321073	-0.00370426	-0.00933954	0.007175	0.00207898	-0.00173632	-0.00510166
Whatcheeria_deltae	-0.0153016	-0.0323482	0.0148882	0.013801	-0.00622334	-0.000786692	0.00215603	-0.000218239	-0.000648416	-0.00181708	1.49125	-0.0100366	-0.124533	0.00468814	0.0411258	-0.00479778	-0.0232311	0.00765279	0.0109355	-0.00590131	-0.335554	-0.185215	0.0603611	0.0485566	-0.0357694	-0.0106883	0.0128406	0.00531097	-0.00233145	-0.00803999	-0.00682972	0.0450961	0.0207359	0.00445513	0.00324909	-0.00081339	-0.00508677	0.0124862	-0.00622816	-0.002015
Youngina_capensis	-0.0176184	-0.0171593	0.014512	8.16367e-05	-0.00773873	0.00082349	0.00178393	0.00208629	-0.00447749	-0.00134645	1.57408	0.00431558	-0.167333	-0.00622216	0.0611481	-0.000117042	-0.0266963	0.000420958	0.012622	0.00238992	-0.197141	-0.0331273	0.0607126	-0.0022234	-0.0269052	0.00758537	0.0187855	0.0018573	-0.0172449	0.00601618	-0.00225846	0.0235799	0.0120799	-0.0045685	0.0104376	-0.00688258	-0.000671057	-0.00300526	0.00436508	0.00502794

## Sheet: F Lateral PCA Axes
		PC1	PC2	PC3	PC4	PC5	PC6	PC7	PC8	PC9	PC10	PC11	PC12	PC13	PC14	PC15	PC16	PC17	PC18	PC19	PC20	PC21	PC22	PC23	PC24	PC25	PC26	PC27	PC28	PC29	PC30	PC31	PC32	PC33	PC34	PC35	PC36	PC37	PC38	PC39	PC40
	Variation explained	44.5506	14.314	13.4763	6.92371	5.05973	4.35583	2.16883	2.00119	1.3141	1.09558
Taxon
Acheloma_sp		-0.191067	-0.00416812	0.0276046	-0.00565557	-0.0138852	-0.0218746	0.00505722	-0.00322948	0.000101098	-0.00795062	-0.00929441	-0.00415242	-0.00198515	-0.00169703	0.00476201	0.00123865	0.00850631	0.00256156	0.00025318	-0.00533464	-0.0014559	0.000885388	0.00340721	-0.00167025	-0.00447428	-0.00166253	-0.00162048	0.00263267	-0.000648091	0.00188914	0.0020484	0.00122026	-0.00117712	0.00205776	0.000107563	0.000520881	-0.0021192	-0.000116871	-0.000738122	-4.20939e-05
Acherontiscus_caledoniae		0.023013	-0.00877023	0.0276194	-0.00782025	0.0410188	0.049954	0.0235963	0.0121048	0.0137159	-0.0142685	-0.0102305	0.0188417	-0.00212823	0.00649925	0.00520549	-0.00927826	-0.00194663	-0.00986382	-0.00202171	0.00943055	0.0051564	0.0053916	-0.000695353	0.0110967	0.000968436	-0.00094864	-0.000750448	-0.00255454	0.00128358	0.00204753	-0.000249199	0.000486645	0.000317964	-0.0012106	-0.000326841	-0.00145918	0.000540768	0.000548901	2.52504e-05	7.90118e-05
Acroplous_vorax		-0.155086	0.0180144	-0.0569243	-0.0263139	-0.0203067	-0.0266617	0.00491355	0.0135081	-0.00571432	-0.0213986	-0.00523244	0.00258702	0.00429603	-0.000681094	0.00690959	0.0229007	-0.00194234	0.0133368	-0.0119963	0.0199676	0.00210421	0.00882291	0.00960747	-0.0055458	-0.00559826	-0.000402271	-0.00752241	-0.0077169	0.000542231	-0.0075446	-0.00348666	0.00150813	0.00362582	-0.00125884	0.000539089	-0.000684681	-0.00152665	0.00135685	-0.00394558	0.000191828
Actinodon_frossardi		-0.139319	0.0137583	-0.0122941	0.0179648	-0.0106043	-0.0175452	0.025647	-0.00735256	-0.0182029	-0.0082349	0.0103964	-5.25249e-05	-0.0112695	-0.00258558	0.00892489	0.00911646	-0.00643183	0.00235026	-0.0110018	-0.00501005	0.00152512	0.00878235	8.1377e-05	-0.00731476	0.00742994	0.00254389	-0.000595942	-0.00579921	-7.55659e-07	-0.00146633	-0.00280754	0.000565233	0.000754777	0.000982398	-0.00259014	-0.000736576	-0.000180569	0.00103881	-0.000496275	-0.00127928
Adamanterpeton_ohioensis		-0.180525	0.0273105	0.00829961	0.0108834	-0.0441739	0.0287354	-0.0135507	0.00820409	-0.00887326	0.0024391	0.00932815	-0.00862178	-0.00859297	0.00889906	0.012328	-0.0111012	0.00672904	-0.000800043	-0.0111856	-0.010331	0.000838615	0.00416527	-0.00904924	-0.00252992	0.0044364	0.00177085	0.0018328	-0.00404719	-0.000765793	0.00256544	0.00063023	0.00485853	-0.00288003	0.000846518	0.000672668	-0.000736371	0.00119807	0.000507109	0.000165467	0.000797074
Adelogyrinus_simorhynchus		-0.011839	0.00236989	0.0812331	-0.0092804	0.0176427	0.0227308	0.00369212	-0.00918364	-0.00825935	-0.00528736	-0.00267253	0.0138171	-0.000308982	0.0100322	0.000937661	-0.00646434	-0.00471034	-0.00588883	0.00371148	0.00841293	0.00617815	0.00258426	-0.000101184	0.00592204	0.00189585	-0.00101989	0.00185644	0.00472816	-0.0023828	0.000917905	-0.00210055	-0.0021361	0.000725348	0.000126214	0.00307349	0.000638372	-0.000358964	-0.000914012	0.000434199	-0.000404073
Adelospondylus_watsoni		-0.0754741	-0.0289647	0.148869	-0.0140439	0.0110279	0.0130572	-0.0015734	0.000727992	0.00310528	-0.00162918	-0.00810533	0.0137962	-0.00031422	0.015635	0.004347	-0.00362089	0.00212832	0.00415393	-0.000922633	-0.00634152	0.0103335	-0.00448287	-0.0100572	0.00050277	-0.00912492	-0.00184736	0.00466767	0.00328792	-0.00077298	0.00141148	-0.000535511	-0.00173611	-0.00183194	0.00298889	0.00184088	0.000394403	-0.000262109	-0.000126792	0.000319403	0.000462279
Aelurosaurus_felinus		0.117523	-0.240094	0.0784479	0.0706969	-0.0158873	-0.0654293	-0.0319539	0.161861	-0.0216356	-0.00626449	-0.00998554	0.0212753	-0.00276097	-0.0258713	0.0133709	-0.0015929	-0.0157173	-0.0127443	0.00110332	-0.0133882	0.00996212	-0.00395081	-0.00354506	-0.0015476	0.00185347	0.00349968	0.000804809	0.00150508	-0.000111362	-0.00614217	0.00101819	-0.00614631	-0.00241205	-0.000813565	-0.00233445	0.00211226	-0.00222568	0.000988667	-0.00256902	0.000447606
Aerosaurus_wellesi		-0.195661	0.0296018	-0.0143838	-0.0297557	-0.0184542	-0.0227685	0.0224949	0.0212166	-0.00812982	0.00307206	-0.00962063	-1.85004e-05	-0.00243364	-0.00023863	-0.00894724	0.00338966	0.00195194	-0.00119885	-0.00793769	0.000839408	0.00740229	-0.000912927	-0.00219374	-4.17016e-05	-0.00590775	-0.0042169	-0.0009457	0.000674374	-0.00348838	0.00161353	2.31991e-06	0.00459484	0.00167768	0.00106794	-0.000490415	-0.000795743	-0.000365354	-0.00111261	-0.000562139	0.00014688
Alrausuchus_tagax		0.0268153	0.0322738	-0.0680449	0.0451309	0.00740249	-0.0212219	-0.00864277	-0.010943	-0.023481	-0.028497	0.00460908	0.0259213	-0.0106508	-0.0103394	-0.0107908	0.00830607	-0.00138241	-0.00238845	-0.0087307	0.00194357	0.00666361	-0.00669832	-0.000503015	0.00202922	-0.00379004	0.00404264	-0.0068814	-0.00201614	0.00943977	-0.00248107	-0.00304506	0.00389468	-0.000138543	-0.000897095	0.00164621	-0.00290889	0.00093268	0.00198365	0.000781393	0.000208676
Alveusdectes_fenestratus		-0.0114331	-0.00839175	0.0283185	-0.0202092	0.0417697	0.0039096	-0.0196271	-0.00146258	0.00423563	-0.0425838	-0.0154239	0.00303276	-0.00873425	0.00323658	0.00412458	0.0126257	-0.000281436	-0.000840725	-0.000644833	-0.00867034	-0.00390981	-0.000557207	-0.00381924	-0.0111049	-0.00132708	-0.00504656	0.00266722	-0.00148624	0.00211129	0.00328551	0.00694178	-0.000107736	0.00107536	-0.00225249	-0.00207241	0.000746722	0.00164504	-0.00110743	0.00124937	-0.000638692
Annatherapsidus_petri		0.067987	-0.0689105	-0.0632016	0.0886123	0.0283007	-0.0199601	0.0379175	-0.0277594	-0.0243181	0.00325244	0.0357947	0.00181748	0.00991842	0.0253145	0.00607888	-0.0105981	-0.00239842	0.0142858	-0.0140252	-0.000502992	0.00549991	-0.00784485	0.00278426	-0.00583882	-0.00512966	-0.00223417	-0.00283559	0.0038727	-0.00334132	0.00297514	-0.00279596	0.00503422	0.00136309	-0.0018887	0.000191755	-0.00288015	-0.00162924	-0.0013209	0.00241284	-0.000785915
Anomocephalus_africanus		0.165849	-0.0242446	-0.0657443	-0.0949953	-0.0268531	0.0322161	0.0194373	-0.0232904	-0.0428857	-0.0385885	-0.0155744	-0.00755078	0.0010243	-0.00875419	-0.00305859	-0.00778186	0.0125751	-0.0106925	0.00273426	-0.0096099	0.000482268	0.0134951	0.00937783	-0.00327738	-0.00221077	-0.00079829	0.00292249	-0.00375211	0.00360034	-0.00150044	0.00543414	-0.0012876	0.00125127	0.00231973	-0.00164834	0.00243624	0.00364158	0.000371138	0.000212972	0.00081746
Anthracosaurus_russelli		-0.0129136	0.0150138	0.0785267	-0.0520012	-0.000857085	-0.0099413	-0.00345824	0.0247052	0.00231724	-0.00460442	-0.00703744	0.0155224	0.00773724	-0.0140399	-0.00509868	0.0120783	-0.00228075	-0.0118126	0.0164381	-0.00204884	-0.0145344	0.00246114	-0.00272291	0.00200118	-0.000525056	-0.0109926	-0.00897511	0.00129125	0.00117457	-0.000258546	0.00148405	-0.00380018	0.000860366	0.000710826	0.000293168	-0.00349312	-0.00172329	0.000283681	0.00181766	0.000318093
Araeoscelis_gracilis		0.0223301	0.0160116	-0.0807066	0.0125542	0.0164234	0.0474205	0.0202447	0.0143279	0.0111216	0.0286515	0.00399719	0.00267841	-0.00410444	-0.00652028	0.006318	0.00295069	0.000393967	-0.000114148	0.00611381	0.00666373	0.000858084	0.00674666	0.000282191	0.00249736	0.00311754	0.0009768	-0.000544844	-0.00364513	-0.00114761	0.000759999	-0.00177339	-0.000270901	0.00209534	0.00159666	-0.00137229	0.00196324	0.000178392	0.0008898	-0.000422569	0.000244297
Archegosaurus_decheni		-0.190113	0.0203746	-0.00374616	0.0158927	-0.0244254	0.00985113	-0.00521646	-0.00368206	-0.0172553	-0.00157891	0.0199008	0.00663509	-0.00682744	0.00358596	0.00108855	0.0063694	0.00187229	-0.00593522	-0.000110145	-0.0057672	-0.000145135	-0.00097166	-0.00199398	-0.00151183	0.00311307	0.00297112	0.00432766	-0.00244003	-0.000624335	-0.00103222	0.000654704	0.000772337	-0.000369417	-0.000405	-0.00189803	0.00100198	-0.000172577	0.000148659	0.00115824	-0.000202988
Archeria_crassidisca		-0.0804272	-0.0750883	0.110681	0.0380507	0.0368412	0.0508739	-0.0209264	-0.013385	0.00588494	0.0384571	0.00143254	-0.0203907	-0.00189004	0.00655984	0.00564979	-0.0040035	0.00727293	0.00409971	-0.0104021	0.000997598	0.0102972	-0.00372231	-0.00898603	-0.00557945	-0.00373194	0.00381302	0.00326294	-0.0015256	-0.000672359	0.00211039	0.00151834	-0.00243425	0.000413279	-6.11504e-05	0.000637801	0.0021581	-3.84255e-05	0.00128855	-0.0008694	0.000506638
Arctognathus_curvimola		0.187968	-0.156188	-0.032382	-0.00493201	-0.0787781	-0.083573	0.0682348	0.0109938	0.0352933	-0.0178079	2.48734e-05	-0.040639	-0.0640626	0.064249	-0.0146267	0.0196424	-0.0275983	-0.0126351	0.0295699	0.00380749	-0.00306162	0.0202665	-0.0119035	0.00842508	-0.0147062	0.00956015	-0.00146681	0.00127216	-0.00371276	-0.000699302	-0.00170567	0.000351006	-0.0020926	-0.0053609	-0.00120659	-0.00323423	0.0037367	-6.17627e-05	0.000104872	-0.00147668
Ariekanerpeton_sigalovi		-0.0353594	0.0367544	-0.0448422	-0.0140587	0.00878975	0.0117671	-0.0103936	0.00532127	0.0134726	-0.0134051	0.00152715	-0.00502196	-0.00291534	0.00230867	0.0145838	-0.000239269	0.00272694	0.00523409	-0.00118767	-0.00152187	-0.00839267	-0.000528404	-0.00395586	0.00276249	-0.0029981	-0.00244417	-0.00263225	0.000730343	0.00324497	0.00259959	-0.00190641	-0.00037645	0.00190502	0.000428042	0.001732	0.00014729	0.000266621	-4.02911e-05	-0.000386848	-0.000252499
Ascendonanus_nestleri		-0.140661	0.0356664	-0.0583143	-0.00402528	-0.00279299	0.0134257	0.00716846	0.00283264	0.00663291	0.0112987	0.00434718	-0.000368888	-0.00592752	-0.0023365	-0.00561239	-0.00971343	0.00291336	-0.00256731	0.00050713	-0.00165739	-0.000389945	-0.00247906	-0.00289285	0.00362642	0.00149098	0.00301796	0.00186201	0.000119406	-0.000181979	0.00114971	-0.00273283	0.00339432	0.0028902	-0.000928417	0.000572685	0.00174755	-8.86844e-05	-0.00027064	-0.000521534	0.000135065
Aulacephalodon_kapoliwacela		0.208913	0.088833	0.0863726	-0.064499	0.047751	-0.0904805	0.0091474	-0.00920269	-0.0321466	0.00391111	0.0326166	-0.00105784	0.0232686	-0.00814497	-0.00531656	0.00101859	-0.00387793	0.000571586	-0.00964063	-0.00517439	-0.0146551	0.0104043	-0.00467441	0.00333842	0.00679324	0.00694753	0.00166575	-0.0063446	-0.000431622	0.00311799	-0.00198252	-0.00293627	-0.00383085	0.00180928	-0.00143741	-0.000893877	-0.0024035	-0.00249709	-0.00194974	0.000650052
Australerpeton_cosgriffi		-0.17397	0.0477785	-0.0771387	0.028277	-0.0838816	0.0368326	-0.0106142	0.0125848	-0.000949979	-0.00309044	0.0202369	-0.0187387	0.00911628	0.000113521	0.0224627	0.00279682	-0.0146601	-0.00056811	0.000244533	-0.00236277	-0.00871003	-0.00050802	-0.00745238	-0.00926849	0.00791662	0.0114003	0.0031042	0.00219363	0.00505186	-0.00432739	0.001736	2.22947e-05	-0.00345304	-0.00326429	-0.00206761	-0.000122897	2.41878e-05	0.00155715	0.00204525	-0.000715173
Balanerpeton_woodi		-0.100607	-0.00735794	0.0651838	0.0114197	-0.0342111	0.0517074	-0.0135331	0.00672927	-0.0257057	0.0043773	0.00689089	-0.0220321	0.00739443	0.0171239	0.00358443	-0.0123708	0.000278408	-0.013217	-0.0158501	-0.00222866	0.00417492	0.0056145	0.000494627	0.000464802	-0.000582988	0.00150101	0.000557167	0.000402706	0.00119466	0.00242044	0.00405856	0.000585265	0.000778766	-0.00216278	-0.00205569	0.00076527	0.00079982	0.00151048	0.000804006	0.000488708
Batropetes_palatinus		0.0160375	0.0769828	-0.0837027	-0.018092	-0.0244445	0.0194319	-0.0628744	0.00115473	0.0442	0.0124917	-0.000570001	-0.0100701	0.00500504	-0.00796148	0.00665084	-0.00564932	0.00331721	0.0293712	0.0180403	0.0148809	0.0143376	-0.00363244	0.00623276	0.00494204	-0.00337484	-0.000900689	-0.00178398	-0.00312401	0.00455101	-0.00895411	-0.00280847	0.00239854	-0.000319316	-0.00155026	-0.00322615	0.00173378	0.00279943	-9.69482e-05	-0.00038371	-0.00174001
Belebey_vegrandis		0.0175304	-0.108103	-0.116713	0.0345842	0.0161544	0.0132015	-0.0100916	0.0935166	0.0210057	0.00364363	0.00264302	0.0502386	0.000237065	0.00800662	0.0225834	0.000883177	0.00661061	-0.00208006	0.000567249	0.00950985	-0.0167101	-0.00590437	0.0027829	0.00490496	0.00198749	-0.0127711	-0.00369161	-0.00317982	-0.00106128	-0.00603973	0.0052825	0.000909752	0.0019125	-0.000469097	0.000308253	0.00049039	-0.00109766	0.00092867	-0.000822939	0.00127664
Biarmosuchus_tener		0.109209	-0.00633956	-0.0123327	0.0629601	0.062973	0.0153074	-0.0436231	-0.0190054	0.00178251	-0.0254809	0.00355256	0.0216806	-0.00716307	-0.0127073	-0.0321099	-0.0058549	-0.0038659	-0.00185262	0.000901201	-0.00385786	0.00419211	0.00371665	-0.00166376	-0.0057188	0.00433405	-0.00472312	0.00235755	-0.000969857	-0.00291466	0.00108314	0.000106708	0.00439689	-0.00333898	-0.00297969	0.000517723	0.000337265	0.000717708	-0.000657914	0.00138544	0.0010494
Biseridens_qilianicus		0.249793	-0.26534	0.0769267	0.00680363	-0.0126092	-0.0163021	0.00495121	-0.0141744	-0.0273284	-0.0494764	0.0785029	-0.0164944	-0.0356896	-0.00265679	-0.00208294	-0.0276086	0.0411917	0.00560567	0.0238697	0.0135262	-0.000641748	-7.55187e-06	-0.000382355	-0.0052851	0.00360986	0.00383106	0.0046867	-0.00236294	0.000822891	0.00407349	-0.0104446	0.00432122	-0.000426391	0.00323749	-0.00385035	-0.0068678	-0.00286333	0.00286829	-0.00066302	-0.000456145
Bolosaurus_major		0.203103	-0.186998	-0.10751	-0.166977	-0.0525798	0.114358	0.0583115	-0.0244145	-0.0795108	0.00625272	-0.0171161	-0.00156352	0.0659208	0.00878015	-0.000404187	0.00984046	0.0119828	-0.00537535	0.0283522	-0.018356	-0.0146795	-0.00803025	0.0159757	-0.00669782	-0.00950908	0.00475968	0.0110637	-0.00721967	0.00165559	-0.00119809	-0.000686003	0.00803066	-0.00935269	0.000457265	0.00948086	0.00184131	0.00160907	0.000718962	-0.00271832	-0.000761024
Bolosaurus_striatus		0.163412	-0.224549	-0.0845138	0.00352844	0.0998365	0.082679	0.053033	0.00708844	0.0433775	0.0130686	-0.00476388	0.0493646	0.0114417	0.0365127	0.0172217	0.0106638	0.0183291	0.0067524	-0.0118432	0.00816586	0.00551384	0.000198416	0.00866322	0.00957488	0.00314128	0.00300535	0.00118499	-0.00398579	0.00448221	-0.00108252	-0.000670124	-0.00171965	-0.00912584	-0.00465384	-0.00511913	-0.00125465	-0.000433349	-0.00147828	0.00195201	-0.00100383
Brachydectes_elongatus		0.0616611	-0.0527297	-0.0324003	-0.0499854	0.033372	0.0170668	0.0122397	0.0271789	-0.0255852	0.00959519	-0.013612	0.0106704	0.00583684	-0.00714605	0.00722241	0.0132782	-0.000965063	-0.0118531	0.00233406	0.00217641	-0.00193296	0.00741251	-0.00640199	-0.000410401	0.00843305	-0.00417442	0.00310524	-0.00108661	-0.00261663	0.00328637	-0.00166252	-0.00560464	0.00160914	0.000256917	0.00472627	-0.00182014	0.00111188	-0.00100344	-0.00199816	0.00227163
Brachyprosopus_broomi		0.221836	0.0851595	-0.0409468	-0.0496427	-0.0108301	-0.0527659	-0.0260285	-0.0107565	-0.0269309	-0.0103619	0.0135337	0.000679707	-0.0105408	-0.0142237	0.0131088	-0.000755821	0.010452	-0.0137129	-0.00592598	-0.0145112	0.00127429	0.00864124	-0.0041389	0.00807798	-0.000434546	-0.00945269	0.00318562	0.00374193	0.00583548	-0.00841592	-0.00637865	0.00046573	-0.000179924	-0.00276459	-0.00134983	0.00421833	0.00239381	0.000755294	0.000908666	0.00106312
Bradysaurus_sp		0.172668	0.140655	0.158412	0.0219107	-0.0507786	0.0769781	0.062538	0.045973	0.0963285	-0.0443579	0.0159658	-0.0505782	0.0145382	0.00614487	-0.0170069	0.00306506	-0.0370468	-0.0227314	-0.0248979	-0.00754284	-0.0114035	-0.0147901	0.0176907	0.00180424	-0.0110735	-0.00203699	0.0124632	-0.0139922	-0.00156795	0.00435454	-0.00633968	0.00181982	-0.00132369	0.00477773	-0.00592323	0.00110377	-0.00388668	0.00281864	-0.000784313	-0.00103618
Broiliellus_reiszi		-0.126475	-0.0579867	0.0262272	0.0328778	0.03726	0.0200486	-0.00262828	-0.0128604	0.0182922	0.00453452	0.0141786	0.0393655	-0.0129432	0.0108247	0.000216441	0.0048673	-0.00967777	0.000679269	0.0111943	-0.00436921	-0.00777385	-0.000104796	-0.00296859	1.13782e-05	-0.00663638	0.000140233	0.00291927	-0.00304547	0.00145858	-0.001886	0.000646199	0.00163838	-0.00322969	-0.000925909	0.000796355	-0.00157458	4.21406e-05	-0.00170865	-0.00112411	0.000280711
Brouffia_orientalis		-0.146569	0.027559	-0.03988	0.0103311	-0.00577758	0.00015479	0.0177592	-0.00427739	0.00514695	0.0100948	0.00247606	0.00596543	-0.00832428	-0.0152295	0.00825177	-0.0114101	-0.0119978	-0.00725118	0.00869281	0.00335893	-0.000358524	0.00310047	0.000979611	-0.00759886	0.00481963	0.00446268	0.00360004	-0.00298499	-0.00148205	-0.00133338	-0.000797778	-0.00122666	0.00200986	-0.00172529	0.0016807	0.00082952	-0.00045786	0.000285872	0.000138672	-0.000831796
Caerorhachis_bairdi		0.012793	-0.0144372	0.13936	-0.00321188	-0.0289195	0.0615938	-0.0222631	-0.0185953	-0.018895	0.0308242	0.00922957	-0.00324893	-0.00400115	0.00588296	0.000588697	-0.00438006	-0.00423209	-0.00623167	0.00824596	-0.0059764	-0.000272859	-0.00137033	-0.000827026	0.00334774	0.00569179	-0.00449901	0.00299304	0.00211315	-0.00186434	-0.000845133	0.00139745	-0.00169786	0.00277732	6.53942e-06	-0.00207444	-4.01665e-05	0.000170644	-0.00029365	-0.00033757	-0.000140471
Captorhinus_aguti		-0.0282437	0.0206468	-0.00292777	-0.0408721	-0.0172357	-0.0026945	0.0465409	0.00716215	-0.0243949	0.0153352	-0.00857965	-0.0212207	0.012966	-0.0120409	-0.00423384	-0.00713644	0.00151317	0.00180422	0.000821705	-0.0115225	-0.00391712	-0.00443874	-0.00919321	-0.00501703	-0.00384821	-0.00237308	0.00177803	0.00657965	0.00169315	-0.00284839	-0.000690969	0.00130428	0.000952025	0.000720024	-0.00243435	-0.0013103	-0.00104187	-0.000808499	0.00244534	0.00106568
Captorhinus_laticeps		-0.0346807	0.0172407	-0.0432437	-0.0302926	-0.00218356	-0.00427567	0.0483175	0.0187975	-0.00633348	-0.00331792	-0.0216967	0.00272648	0.0144825	-0.00493486	-0.0108087	-0.014033	0.00303093	-0.0126776	0.00620318	-0.00555029	0.000848052	0.00110677	0.00143175	0.000541363	0.000166121	-0.00340039	-0.00248068	0.00172153	-0.00273614	-0.000196473	-0.000178239	0.00178376	-0.00102347	-0.000969308	0.00067248	-0.00149632	-0.000456101	0.00130725	0.00109128	-7.78974e-05
Carbonodraco_lundi		-0.0314246	-0.025833	-0.0205968	0.0193041	0.0200277	-0.00692194	0.013626	-0.0292384	0.0186786	0.00607552	-0.00881462	-0.0194033	0.00756361	-0.0167055	0.0142227	-0.00422326	-0.0040936	0.0128752	0.00277314	-0.00661668	-0.00964544	-0.00509497	0.00252484	-0.00561329	-0.00849302	-0.00129156	-0.00134784	-0.00573172	0.000487261	0.000136689	-0.00224741	-0.00248725	-0.00112035	-0.00108093	0.00101895	-0.00158102	0.00134374	-0.000388876	0.00104525	0.00305311
Carrolla_craddocki		0.0605212	-0.00913152	-0.0269489	-0.0307316	0.0114553	0.0132021	0.0413276	-0.0127365	-0.00604378	0.00469909	0.000989654	-0.0223235	0.00431869	-0.00826192	0.0155325	0.0176799	-0.00927591	0.0176886	-0.0068449	0.0171689	0.00129716	0.00683627	0.00308742	0.00312386	-0.00404021	-0.0022261	0.00249416	0.00746433	-0.00104851	-0.00731842	0.000256092	0.00530062	-4.3704e-05	-0.00206279	0.00182054	0.00024516	-0.00218784	-0.000243226	0.0017637	0.00173459
Casea_broilii		0.0318107	0.0025618	-0.0604482	-0.0213501	0.0463669	0.0222815	0.0350514	-0.00384366	-0.00994998	0.00984186	0.00272693	-0.021927	0.0124157	-0.00304928	0.00930397	-0.00778395	0.00790275	-0.0116038	0.000507299	0.00186009	-0.000638158	0.00872676	0.00371134	0.00482593	0.000865219	-0.00384525	0.00518633	0.00345419	0.0053045	0.0026775	0.00227516	-0.00161119	0.00374027	0.000107413	-0.00109661	0.000501086	-0.00139076	-0.000877814	0.00130399	-0.00144028
Cephalerpeton_ventriarmatum		-0.105102	-0.00953205	0.00846062	0.00351155	-0.0129466	-0.00901234	0.0145534	-0.0168504	-0.0133658	0.0106977	-0.00288223	-0.00668885	0.000977997	-0.00801201	0.00869107	-0.00131022	-0.00950675	-0.00242025	0.010026	0.00108866	-0.00522978	0.00829844	0.00654357	0.000241118	0.0099966	0.00119393	-8.38088e-05	-0.00206091	-0.00481264	0.00166185	0.00364994	0.00199835	-0.000959632	-0.000725404	0.000277506	0.000697139	-0.00106805	-0.00033046	-0.000356042	-0.000568203
Chroniosaurus_dongusensis		-0.192494	0.0257025	-0.00914444	0.00988111	-0.0291726	0.00897387	-0.00291328	0.00577776	-0.0155325	0.000435299	0.0156469	0.00802973	-0.00309453	0.00669104	-0.000690396	0.00915638	0.000250189	-0.0117919	-0.00211205	0.00206287	0.00035436	3.01843e-05	0.000530806	-0.000625264	0.0028302	0.00294073	0.000260432	-0.000379189	0.000258154	0.00146144	-0.000828201	0.00190892	0.000982115	-0.000256107	-0.000682988	0.000255167	-0.000271462	0.000334685	8.3654e-05	-0.000411938
Chroniosuchus_paradoxus		-0.184786	0.0243016	0.0081209	0.0198355	-0.0204364	0.0194231	-0.0189066	-0.00606294	-0.00955312	0.00250284	0.0190754	-0.00602219	-0.00932566	0.00502473	-0.00372977	-0.00886437	0.00325709	-0.0109233	-0.00340553	-0.00151668	-0.00112451	-0.00305573	-0.00176839	0.00197125	0.00700331	0.00542357	0.00376634	1.94792e-05	0.00252074	-0.00241328	-0.00145569	0.00313447	0.00109623	-0.000192182	-0.000931917	0.000149784	0.000333187	-0.000914217	0.000439243	0.000240769
Claudiosaurus_germaini		-0.177452	0.034206	-0.0592585	-0.0181028	-0.0263498	-0.00098127	-0.00564269	0.0148503	0.0126782	0.00786215	0.010709	-0.00113836	-0.00200785	0.00172172	-0.00252991	-0.00617039	0.00328784	0.00254062	0.00181411	0.000504081	0.000769004	-0.00175655	-0.00535937	0.0046936	-0.00139211	0.00436982	-0.000376966	8.72352e-05	-0.000996024	0.0013823	-0.00264976	0.00440971	0.000512237	-0.000194679	0.00144494	0.000614642	-0.000475374	-0.000661608	-7.67836e-05	-0.000479332
Cochleosaurus_bohemicus		-0.168612	0.000721912	0.0267784	0.028218	-0.0181057	0.0198554	-0.0167043	-0.00414363	-0.00649518	-0.00296395	0.0150864	0.0187803	-0.00991021	0.00659563	-0.00239151	0.00485238	0.000557854	-0.008421	0.00181472	-0.00528857	-0.00595459	-0.000641452	0.00124429	-0.00199678	0.00248768	-0.00247985	-0.000168361	-0.0019365	0.00142251	0.00148355	0.00271152	0.000921579	-0.00192699	-0.00105793	-0.00107609	-0.00152262	0.000651719	0.00040774	-0.000174959	0.000107827
Colobomycter_pholeter		0.0207855	0.039894	-0.0393074	-0.00611209	0.00783098	0.019752	0.00199373	0.00336544	0.0246889	0.021057	-0.000841566	-0.0201721	0.00524511	-0.00316557	0.00504516	-0.0110808	-0.000394721	0.00332256	0.00596666	0.00102055	0.00307115	-0.00313277	-0.00175401	-0.000570905	0.00115914	-0.000783098	-0.00260769	0.00088114	0.00220382	0.0028808	-0.000678922	-0.000333561	-0.000808388	4.16255e-05	-0.000513776	0.00201329	-0.000108437	0.000369657	0.000199869	0.000544076
Coloraderpeton_brilli		-0.189381	0.00929435	0.0773361	-0.0309188	-0.0539983	-0.039392	-0.0337304	0.0183647	-0.00968683	-0.00586406	0.0024022	-0.0136112	0.0169296	0.00683377	0.00661772	0.00979531	0.003864	-0.000291659	0.00183962	-0.00202862	0.00504587	0.0025668	-0.00267189	0.00195182	0.00146654	-0.00467009	0.00129065	0.00313502	0.000562234	0.000752922	0.00014513	-0.00075587	-0.00596421	0.0016363	9.03667e-05	-0.00268512	-0.000813785	-0.00150487	0.000274954	0.00230624
Colosteus_scutellatus		-0.139556	0.0491913	-0.018601	-0.0139623	-0.0305455	0.013024	-0.0158315	0.00628537	-0.00518285	-0.00245528	0.0104958	-0.00602734	-0.00464581	-0.000420122	-0.000669099	0.00443573	0.00226712	0.00147637	-0.00228071	-0.00159052	-0.000744705	0.00173485	0.00243167	-0.000740076	-1.25683e-06	0.000957677	0.00253594	-0.00172284	-0.000348459	-0.00249108	0.00107066	-8.89478e-05	0.00321477	-0.00136476	-1.33396e-05	-0.00110196	-0.000514453	-0.000217613	-0.0020921	-0.000506332
Cotylorhynchus_romeri		0.0696348	0.0686925	-0.0951117	-0.0452471	0.0103668	0.030944	-0.0355479	0.0157934	-0.00646903	-0.0611072	-0.010722	-0.0136031	0.00299849	0.00873325	-0.0196991	0.00710286	0.00482982	-0.000633273	-0.00998788	0.0116064	-0.00605071	0.0107173	0.00222656	-0.00940316	0.00666511	0.00216335	0.0130202	0.00539906	-0.00565163	-0.0072286	0.00302809	-0.0018363	-0.000886544	-0.00156431	-0.00115004	-0.00266401	-0.00138453	-0.00308536	0.00118708	0.00101348
Crassigyrinus_scoticus		-0.110244	0.0311171	0.0287223	-0.0339546	-0.0354984	-0.0176253	-0.00803174	0.0105696	-0.0169835	-0.0112975	-0.00180367	-0.005134	0.0118556	-0.00137671	0.00461968	0.0134647	-0.00353122	0.00621637	-0.00326516	-0.00113973	-0.0052309	0.00018841	-0.00493077	0.00222051	-0.00145665	-0.00500614	-0.0112224	-0.00254702	0.000235434	0.00713938	0.00273373	-0.00140949	-0.0025401	-0.000960396	0.00268622	-0.00448647	0.00076285	0.00142729	0.000370194	-5.68808e-05
Cynariops_robustus		0.120371	-0.332893	-0.0688817	-0.155707	-0.0992123	-0.0774625	-0.0143429	-0.02406	0.00952187	0.0179384	0.0513714	-0.0257285	-0.0354211	0.0169877	-0.0315168	-0.0108432	-0.00648129	-0.00699758	0.00430908	0.0187934	-0.00905793	0.00104802	-0.0160428	-0.0132951	-0.0103979	-0.00107653	-0.00727517	-0.00145614	0.00449028	-0.00254905	0.00896337	0.00300105	5.27534e-05	0.00727608	0.00393208	0.00653694	-0.00146626	-0.000650256	-0.00206958	0.00219465
Daptocephalus_leoniceps		0.24623	0.0861927	0.0816116	-0.0215035	-0.00865639	-0.0913179	-0.00535237	-0.0189799	-0.00629426	0.054457	0.00555385	0.00797272	0.0181418	0.0128931	-0.0234172	-0.00958731	-0.00673768	0.0208348	-0.000883543	-0.00390096	-0.0135922	0.0148903	-0.0100944	0.00733427	0.014285	-0.005197	0.00516949	-0.00340468	0.00475162	0.00552271	-0.00116029	-0.00202311	0.00320222	-0.00279206	0.00115713	0.00110892	0.000197046	-0.00115074	0.00168	-0.000860962
Delorhynchus_cifelli		0.029945	0.0154558	-0.10079	0.00893981	-0.0118402	0.00848845	0.0269904	0.0077949	0.0402423	0.0225553	-0.00456546	-0.0311629	0.0159021	0.0140149	0.00513894	-0.006764	-0.00333475	-0.00379056	-0.00212421	0.00204905	0.00679384	0.00317909	-0.00415998	0.00169909	0.000458472	0.00534367	-0.000785994	0.00172893	0.000832535	0.00524224	0.0039774	-0.00342818	-5.30385e-05	-0.000770215	0.00114372	-0.00438886	0.000726337	-0.00110493	-0.000554831	0.00327025
Delphaciognathus_paucidens		0.0291915	0.0258175	-0.0385679	-0.0123522	0.0660765	-0.0800614	0.00449126	0.00997712	-0.00168473	-0.052963	-0.000773817	0.0118143	-0.00897287	-0.0144496	0.00979255	-0.00593683	-0.00718891	-0.0103635	-0.00343501	-0.00462651	0.0119311	-0.0133609	-0.0117768	-0.0152479	-0.00166322	-0.00133663	-0.00667028	0.00268742	0.00403297	0.00351346	0.00251598	0.0066652	-0.00252282	-0.00372157	-0.00342423	-0.000720828	-0.002139	-0.00487332	0.00122397	-0.00059204
Deltavjatia_rossicus		0.320563	-0.000517262	0.190942	0.268354	-0.250208	0.0184668	0.0517969	-0.00502967	0.0367711	-0.0193691	-0.00694782	0.00571908	0.0266981	-0.0195551	0.00490215	0.0113799	0.0367865	-0.00803841	0.0100053	0.00169372	0.00450979	0.00758237	-0.0131735	-0.00333092	-0.00577483	-0.00900567	0.00658934	-0.00253489	-0.00119716	-0.00577234	-0.00127152	-0.00128945	0.00832601	-0.00339451	0.000435984	0.00146114	0.00024596	-0.00334614	0.000685624	-0.00175228
Dendrerpeton_helogenes		-0.122997	0.029971	-0.0341743	-0.00374568	-0.0245961	0.031941	-0.023132	0.00761657	0.00150078	-0.00816593	0.0134508	0.00629301	0.00453295	0.00472304	-0.00239443	0.00131491	0.000427661	5.03198e-05	0.0100518	-0.00282748	-0.0123294	0.000130741	0.00117633	0.00482049	0.00565687	0.00159723	-0.000655538	-0.00202395	0.000250614	-0.00183116	-0.00030084	0.000576388	0.000718153	0.0015804	-0.00248027	-0.000440032	0.00104965	5.90656e-05	-0.000258491	0.000217348
Desmatodon_hesperis		0.176625	-0.0598139	0.0636586	-0.0700951	-0.0271104	0.0742627	0.019305	0.0202267	-0.00418712	-0.0502017	-0.0061457	-0.00815343	0.00237217	0.0147653	0.0196718	-0.00618224	-0.0122705	0.00459742	-0.0130876	0.00450606	0.00953477	0.00807317	-0.006186	-0.000850122	0.00339392	0.000124263	-0.00975226	-0.0124268	0.00667949	-0.00455043	0.000381595	0.00244776	0.00209652	-0.00162176	0.000692489	0.000315557	-0.00246912	0.00138735	0.00229403	0.000217409
Diadectes_absitus		0.0156462	0.0279229	0.0121128	-0.0472519	0.0144082	0.0131868	-0.00923368	0.0146012	0.00384858	-0.0367052	-0.00711444	0.008527	-0.00222749	0.0112707	0.00862773	0.00714081	0.015187	0.00393553	-0.00572834	0.00623719	-0.00763426	-0.00508387	-0.00190173	0.00734887	-0.00997317	0.000730643	-0.00247471	-0.00241093	-0.00233862	-0.000774976	-0.00391379	-0.00432582	0.00321119	0.00423022	0.00130949	0.000731651	-0.000266612	-0.00122841	0.000367001	0.000371173
Diadectes_lentus		0.291998	0.00145654	-0.0178363	-0.0970924	-0.0104772	0.0893379	-0.0129922	0.0366468	-0.0182334	0.000232306	0.0114037	0.00672145	-0.00409182	-0.00229299	0.00165333	0.0367002	-0.0100524	0.0291733	0.0159724	0.00111946	0.00274791	-0.00474593	-0.0119979	0.00319117	0.00894284	-0.0026312	-0.000910923	0.000974769	0.00228022	0.00805049	0.00410206	0.00216263	0.00618424	0.00157055	-0.00499236	0.00281388	0.00089722	0.00203169	0.00305035	-0.000315497
Dicynodon_lacerticeps		0.246831	0.125403	0.0478505	-0.0275137	-0.0237262	-0.103998	-0.0365801	0.0108795	0.0521222	0.0153085	-0.0468772	0.00660748	-0.0268673	0.0339149	0.00622269	0.0171129	-0.000349498	-0.00821226	0.00319402	-0.00296142	0.000147036	-0.00884322	0.000710264	0.00083162	0.01157	0.0052643	0.0145706	-0.010517	0.0019766	-0.0030577	-0.00268574	0.00192574	-0.00032671	0.00432063	0.00663849	-0.00410325	7.12593e-06	0.00234109	0.00214263	-0.0015148
Dicynodontoides_sp		0.0583401	0.0544813	-0.000104599	-0.060693	0.0386369	-0.0841307	0.048517	-0.0218877	-0.0347135	0.000192395	-0.0207062	-0.01823	-0.00595688	-0.0302665	-0.00475825	-0.00295669	-0.0197739	0.00545836	-0.0103558	0.00168841	-0.0146114	-0.00195587	-0.00333564	-0.00278053	0.00305478	0.00107043	-0.00708558	-0.00326711	-0.000101581	-0.00609791	-0.00346262	0.00563836	0.00364522	0.00626493	-0.000387332	-0.00296453	0.0011113	-0.000198353	-0.000350148	0.000338534
Diictodon_feliceps		0.239353	0.0773506	0.0602571	0.0161869	-0.0938425	-0.0922339	-0.0124387	-0.00405434	-0.0296749	0.0134402	-0.00469223	0.051119	0.0329266	0.0452494	-0.00194196	0.00535317	-0.00979531	-0.0129847	0.00636324	0.0172186	0.011265	-0.0112161	0.0145104	-0.0118001	-0.00520087	-0.00823186	-0.00156597	0.0100265	0.00886277	0.00788979	-0.00725546	0.000403811	0.000480842	0.000388183	-0.00478756	0.00014835	-0.000161584	-9.64881e-05	-0.00283392	0.00271279
Dimetrodon_spp		0.0872906	-0.00475344	-0.0569549	0.0569798	0.049303	0.0294032	0.00280057	-0.0147389	-0.00682025	-0.00595477	-0.0132676	0.0113137	-0.0199727	0.000706801	-0.0099994	0.000475766	0.00228489	0.000589131	-0.00869507	0.00267445	-0.0124292	0.00244793	0.000522268	0.00432801	-0.000846219	0.00215947	0.00300186	0.00140918	0.00506828	0.00128733	0.00508939	-0.00175781	0.00208762	0.000640278	0.00106325	-0.00483713	0.00103951	0.000596363	-0.00267834	-0.000844947
Diplocaulus_magnicornis		-0.0706004	0.0155036	-0.0203215	0.0148845	-0.012966	0.0210449	0.00257589	-0.00287794	-0.00372616	0.0183608	-0.00032961	-0.0241099	0.00653204	0.00913582	0.00730758	-0.0123439	0.0008213	-0.00707121	-0.00996131	0.011972	-0.00191419	-0.000288519	0.00405362	-0.0046255	0.00528223	-0.0158439	-0.0057872	-0.00683782	0.00169536	0.00294659	0.00798942	-0.000806661	-0.00297365	0.00100837	-0.00322107	0.00158529	0.00240468	0.00101658	-0.000675768	0.00240264
Diploceraspis_burkei		0.107441	0.0475804	-0.140613	0.00257077	-0.0462324	0.038941	-0.0274001	0.0296294	0.010151	0.00240036	-0.00549691	-0.00865054	-3.49775e-05	-0.0017479	-0.00461793	0.0105594	-0.00562146	0.0109239	0.00330404	0.0211441	0.0129535	0.00953711	0.00138621	-0.00493948	-0.00222215	0.00208392	-0.00467031	-0.00554597	0.00431639	0.00216873	0.000925887	-0.00436613	-0.000195299	0.00110004	0.000795109	0.000793941	0.000978641	0.00214872	0.0006343	-0.00102952
Discosauriscus_austriacus		-0.0590709	0.0279942	-0.0173325	-0.0110533	0.00534938	0.0167384	-0.0124844	-0.00542337	0.00789414	-0.0151132	0.000550635	-0.000849758	-0.00346857	0.00189722	0.00847969	-0.00542196	-0.00178391	0.00322556	-0.00314306	0.00105349	-0.00447759	-0.00188112	-0.00236561	0.00309388	-0.00670344	-0.000217286	-0.00115487	0.00223102	0.00180542	0.0033858	-0.00151357	-0.00220875	0.00060629	-0.00157132	0.0025661	0.000388241	0.000932333	-0.000571812	-0.00105517	-0.000200756
Doragnathus_woodi		-0.156836	0.0352746	-0.00525724	-0.0105263	-0.0312446	-0.0181246	0.00919604	0.00554401	-0.01181	-0.0105307	0.00226313	0.0089214	0.0028238	0.00229772	-0.00284084	0.00249031	-0.00564213	-0.000149904	-0.00110394	-0.000208275	-0.00267897	-0.00242401	0.00178308	-0.00200679	0.000389159	0.00268136	0.000246501	0.00323529	0.00200783	-2.27298e-06	-0.00236766	-0.00145475	0.00105273	-0.00244877	0.000943902	0.00101817	0.000790068	0.000736601	0.000609895	-0.00188477
Dvinia_prima		-0.0012745	-0.0905204	0.0142009	0.0180088	0.138668	-0.0607097	0.0582096	-0.0186813	0.0405386	0.00129805	-0.0262214	-0.0118805	0.00217879	-0.00714638	-0.00127723	0.0256588	0.0106721	-0.00135705	0.0063647	-0.0065581	0.00507409	-0.00394616	-0.00149461	1.93504e-05	0.0109311	0.00869231	0.0021242	0.00129407	0.0123463	-0.00273212	0.00627102	0.00382992	0.00214672	0.00453406	-0.00485543	-0.00114453	-0.000148552	0.00120017	-0.00123845	-0.000384366
Edaphosaurus_boanerges		0.151142	0.0326415	-0.0715202	-0.023584	-0.0226749	0.0975556	-0.00161988	-0.0213425	-0.0476059	-0.00123677	-0.00662643	-0.00385605	-0.0327949	-0.000469451	-0.0169461	-0.0117763	-0.00503256	-0.00957957	-0.01456	-0.00345355	0.0131103	-0.00392817	-4.3406e-05	0.00649233	0.00287365	0.00373885	-0.0104001	-0.00842646	0.0134604	-0.00316972	-0.00431088	-0.00784751	-0.00201924	0.0032455	0.00312909	0.00312616	-0.000239925	-0.00560636	0.00305971	-0.000368847
Edaphosaurus_claviger		0.191332	0.0737235	-0.0741992	0.0209371	-0.0337255	0.0595064	-0.0211455	-0.00286656	-0.0183712	0.00647449	-0.0158218	0.0148649	-0.045949	-0.00476047	-0.0141815	0.00797565	0.00555718	0.00151421	-0.00308332	-0.014545	0.0120924	-0.00326329	0.00930894	-0.00529389	-0.000945208	0.000100973	-0.00846914	0.00429881	0.00283647	0.00111804	-0.0102342	-0.00393349	-0.00296692	0.00358578	0.0026284	0.00153213	0.00226829	-0.00343657	-0.000555579	-0.00100733
Edaphosaurus_cruciger		0.221809	0.0431568	-0.0296636	-0.0232226	-0.0212364	0.128294	-0.00587043	0.0132943	-0.0154163	0.000772609	-0.0127798	-0.00645629	-0.0337627	-0.00255271	-0.0161325	0.0169827	-0.0131183	0.0053787	-0.000218041	-0.00158598	0.00825511	-0.00756291	0.00249804	-0.00418027	0.00803985	-0.00161838	-0.00291967	0.0012575	-0.00246041	0.00585883	0.000580965	-0.00350036	-0.00188813	-0.000532457	-0.0020737	0.00388626	-0.00278899	0.00162323	-0.00339047	-0.00287484
Edaphosaurus_pogonias		0.165771	0.029979	-0.0269326	-0.0495959	0.00527868	0.0897471	0.0214101	0.0212827	-0.0200173	-0.00174017	-0.0158163	-0.00354714	-0.00966577	-0.00471868	-0.0330386	0.0089681	-0.0180084	0.000248717	0.00317449	-0.00266469	0.00968391	-0.00754695	-0.00337007	-0.000228416	-0.000359026	-0.00278986	0.00311747	0.00948339	-0.00212077	0.00404684	0.000825231	0.00251304	-0.00369034	-0.00436716	-0.00256472	-0.00258459	-0.00162141	0.000816183	0.0013097	0.000520067
Eldeceeon_rolfei		-0.055157	0.0045165	0.0328241	0.0312035	-0.0108486	0.0346104	-0.0181118	-0.0270251	-0.0105504	-0.0024337	0.00783826	-0.0111061	1.16964e-05	0.0107476	0.0123704	-0.00343024	-0.00649523	-0.00366889	-0.0058005	-0.00488062	-0.00986847	-0.0057937	-0.000647268	-0.00334001	-0.000637368	0.00083772	-0.000511988	0.000230456	0.00240117	0.00420786	0.00249955	0.000822639	-0.000451071	-0.00197785	-0.00101069	0.000564271	0.000632992	-0.00061451	-0.000924071	-0.000940184
Emydops_arctatus		0.184358	0.0723214	0.0146545	0.0599698	-0.0695349	-0.0625786	0.0581343	-0.0184856	-0.00113194	-0.00323296	0.00130836	0.0107302	-0.00946391	-0.0433028	0.00880022	0.000150816	-0.0159245	0.000328199	-0.0111397	0.0157263	0.000435081	-0.0192465	-0.00623105	0.00170754	-0.00394146	0.0039509	0.0151093	0.00128738	0.0106089	0.000358344	0.00422025	0.000385841	-0.00407718	-0.00147766	0.00196387	0.00297579	0.00221569	-0.00266559	-0.0012654	-0.000101933
Endothiodon_mahalanobisi		0.155509	0.0642422	0.0157906	0.0735247	-0.0166169	-0.0978461	-0.00127326	-0.0264421	0.0104329	0.0187743	-0.0168497	0.00368255	-0.00294398	0.0339356	0.0030522	-0.00770056	0.0110563	0.0174066	-0.0119597	-0.00244287	-0.00920165	0.01588	0.00835394	-0.0129892	0.00712685	-0.0110634	-0.00102429	-0.00274879	0.00425031	0.00694388	-0.00577185	0.00804836	0.00288377	0.00119665	0.000201091	-0.000120306	0.00127384	-0.000245551	-0.000378182	-0.000209647
Endothiodon_tolani		0.0686173	0.0695666	-0.0499267	-0.0968967	-0.0375725	-0.0560227	-0.00888072	-0.00615686	0.000831774	0.0148107	-0.0238622	-0.0131844	0.00251482	-0.00224398	0.0074421	0.00586947	-0.00707334	0.0122498	0.0107576	-0.0133917	0.0093485	-0.00171926	-0.00213057	0.00022376	-0.000811389	-0.00801642	0.00658192	-0.000337346	0.00693535	0.00264787	0.00365932	0.00410589	0.00137267	0.00252222	-0.00338328	-0.000426836	-0.00144748	-0.00200178	-0.00286073	-0.000127523
Ennatosaurus_tecton		0.142776	0.0499199	0.0465607	-0.0682694	0.0264637	0.0259385	-0.0370725	0.0109993	0.0183328	-0.0485654	-0.00808314	0.00248054	0.00308157	0.00590401	-0.000830154	0.0132399	-0.00619086	0.0133361	0.00787765	0.0062199	0.0147492	0.00519577	-0.0017011	-0.00530466	0.00987138	-0.00164499	0.0121761	-0.00700656	-0.00308451	-0.000697501	-0.000646905	0.00249695	-0.00293216	-0.0020463	0.00193838	-0.000868017	0.000759807	-0.00376747	-0.00101454	0.00279068
Eobaphetes_kansensis		-0.01914	-0.0761216	0.177782	0.0175648	0.0362393	0.0388849	-0.0140133	-0.019974	-0.00694211	0.0264864	-0.0142722	-0.0233502	-1.84012e-05	-0.000324786	-0.0071071	0.00012633	0.00251457	0.00673696	-0.00260316	0.00111496	-0.00355686	-0.00359022	-0.0026037	-0.00212768	0.00163552	-0.00585582	0.00320312	0.00111439	0.00939756	-0.009041	0.00182795	0.00194665	0.00366787	-0.000296437	-0.000353653	0.00141183	-0.00135812	0.00151706	-0.000196191	0.000591606
Eoherpeton_watsoni		-0.139162	-0.0385785	0.0965527	-0.00984211	0.0318126	-0.0118224	0.0121564	-0.00806771	0.00341146	-0.00698073	-0.00531633	0.00774363	-0.0101063	0.00253769	0.0049527	0.0209547	0.0137365	0.0109805	-0.00317335	-0.00313111	0.00315131	0.00463931	-0.0038415	-0.00387826	-0.00424435	-0.00274784	0.00241123	-0.000377283	0.00308727	0.00347521	0.00353556	-0.00161975	-0.00195627	0.00392012	0.00216446	0.000397563	-0.000414528	0.00080006	0.000269487	-2.03926e-05
Eosimops_newtoni		0.209122	0.0756985	-0.0753874	-0.0481515	-0.00907574	-0.0226733	-0.0164023	-0.0178308	-0.0332645	0.0460639	-0.00408708	-0.000441954	-0.0185721	-0.021556	0.0309255	0.00862228	0.0161537	0.00462611	0.0107067	-0.00825059	0.00294336	0.00128146	0.00716404	-0.00362629	-0.0187012	0.00798112	0.00162914	0.00072142	-0.00521104	0.00672614	0.0063369	-0.00424547	0.00723318	0.000519663	-0.0114019	-0.00139736	-0.0012118	-0.000722468	-0.000543373	0.000553415
Eothyris_parkeyi		-0.0830002	-0.0199294	0.0746923	-0.0136004	0.0182018	0.00460226	0.012594	-0.0178844	-0.00261803	0.00240349	-0.00243785	-0.0017504	-0.00319439	-0.00929538	0.000161218	-0.00724848	-0.00438498	-0.000587477	0.00330887	-0.00147412	0.00226479	0.00559566	0.000748173	-0.00169699	0.00127474	-0.00285824	0.00515352	0.0018536	-0.00240787	-8.8619e-06	-0.000540217	0.0010909	-0.000523701	0.00128959	0.00110017	7.02527e-05	-0.00076604	-0.0021329	9.75542e-05	8.98037e-05
Eryopoid_jaw		-0.14934	-0.0210354	0.0659322	-0.00592884	0.0176396	-0.0120338	0.0234732	-0.00739815	0.00905412	-0.000969617	-0.0106728	0.0207565	-0.0145199	-0.0104507	-0.018908	0.00578529	0.00132285	0.00044075	0.00706841	-0.0010651	-0.00368931	-0.000173799	0.00477314	-0.00505932	-0.00288091	-0.00487619	-0.00267593	0.000717212	0.000411769	-0.00250709	-0.00188238	-0.000441092	-0.00314324	-0.00113664	-0.00176902	0.000686287	-0.000962394	0.00120183	-2.08475e-05	-0.000334603
Eryops_megacephalus		-0.0894108	0.00229877	0.0821848	0.000186428	0.0185991	0.00476232	0.016223	-0.00724932	-0.00625171	-0.0140595	-0.00883281	0.0273926	-0.0144286	0.00263235	-0.00390352	-0.0112594	0.00924314	-0.00302335	-0.000176112	-0.00313703	-0.0036308	-0.00293577	-0.00260504	-0.000514708	-0.00527821	0.00581436	-0.00479946	0.000405039	-0.00655991	0.00042544	-0.00145453	-0.0030319	0.00333777	0.00577249	-0.00179114	0.00199212	0.000510687	-0.000596881	-0.000860268	-0.00309118
Estemmenosuchus_mirabilis		0.124157	0.000592895	-0.040783	0.0342883	0.0555012	0.0131388	0.00451632	-0.00377661	0.0311408	-0.0173252	-0.000823986	-0.00554655	0.0144234	-0.0179742	0.0121909	-0.0110914	-0.00615001	-0.0022106	0.0139144	0.00106573	-0.00513131	0.00411085	-0.00145798	-0.0206655	-8.43229e-05	0.00541033	0.00115527	0.00572901	-0.00362552	0.00859026	-0.00277009	-0.00776442	-0.000208888	-0.0041986	5.04399e-05	0.00338244	0.00119262	0.00141059	0.00160056	0.000835843
Estemmenosuchus_uralensis		0.140326	-0.00398565	-0.0225397	0.0349343	0.0912682	-0.00458932	-0.0354363	-0.0114642	0.0102309	-0.0348155	-0.00155923	0.0118447	0.0124373	0.00875192	-0.0143493	0.00645556	-0.000570285	-0.00562512	0.00134198	0.00348075	0.00574571	-0.00125822	-0.00569826	-0.00299061	0.00119849	0.00250708	0.00757963	0.0019512	-0.00372494	0.00306442	0.00335765	0.000909238	0.0047322	-0.00262307	0.00182624	0.00194678	0.00108506	-0.0008626	-0.000102918	0.000616444
Euptychognathus_bathyrhynchus		0.0765977	0.0935551	0.0618157	-0.0678166	0.0232312	-0.0654137	0.00153896	-0.0213203	-0.019449	-0.000230321	-0.00274099	0.0127217	-0.0201351	-0.0282417	0.019654	-0.0212455	-0.00662609	-0.00834681	0.000929432	0.0230865	0.00683171	0.0150899	0.000660639	0.00633245	0.00372207	0.00277542	0.00441584	-0.00232487	-0.00957615	-0.00105565	0.00569383	0.00398792	-0.0109737	0.00347504	-0.00202947	0.00186172	0.000217891	-0.000484465	0.00139909	-0.0015962
Euryodus_dalyae		-0.028798	0.00274194	-0.142003	-0.0312009	-0.0292038	-0.00978222	0.0306831	0.0350895	-0.0109717	0.0132233	-0.00751464	-0.00619382	0.0285312	-0.00253551	-0.00276279	-0.012282	0.0105607	-0.00933491	-0.0022586	0.00156156	-0.00222567	0.00084997	-0.00840779	-0.00301809	-0.00742718	-0.00716973	0.00128051	0.00678112	0.00467631	-0.00628629	0.0030285	-0.00206183	0.00117133	-0.00694523	-0.0015778	-0.00408785	-0.000605419	0.00083118	0.000773569	-0.00452813
Feeserpeton_oklahomensis		-0.00641632	0.0389129	-0.0108059	-0.0244029	0.0141318	0.0225747	-0.00187906	0.0136341	0.0272258	-0.00207268	0.000537999	0.00603081	0.00475197	0.00333484	-0.000309592	-0.00456831	0.00756949	0.00842517	0.00725501	0.00256823	-0.00163543	-0.00525373	-0.00146393	0.00575912	-0.00373002	0.0011791	-0.00149271	0.00206086	2.06905e-05	0.000597988	-0.000474471	-0.000656265	0.00137557	0.0017211	0.000914258	2.6026e-05	-0.000530693	-0.000340719	-0.00124896	9.09728e-06
Gansurhinus_naobaogouensis		0.00890957	-0.0440328	0.0259144	-0.0330641	-0.0176804	-0.0243077	0.0421014	0.0176006	0.00905187	-0.0302571	-0.0230449	0.0123007	0.00380139	0.00546066	0.017715	-0.0175711	0.00314907	0.0125535	-0.000735785	-0.000184621	0.0184468	0.00766676	0.00411433	0.00523356	0.00574021	0.00636693	-0.00120423	0.000693444	-0.00880447	-0.00169508	-0.000663258	-0.00230248	-0.00101448	0.00208685	0.000152604	0.000860273	-0.00115142	0.00109627	-0.000744891	-9.57829e-05
Gephyrostegus_bohemicus		-0.127435	0.00862337	0.00898832	0.0034258	0.00195835	0.00326741	-0.00824809	-0.00656522	0.00118271	0.00689076	0.00823397	-0.000682908	-0.00782544	-0.0100666	-0.00337556	0.00955955	0.000424413	-0.0105265	0.00909969	0.000214513	-0.00292988	0.00135789	0.00459539	0.00135261	0.00419233	-0.00242715	0.00102827	-0.00238908	0.00275741	0.00152305	-0.000737482	-0.00217536	0.00258396	-0.000312062	0.000836785	0.000704154	-0.00103456	0.000845029	0.000283129	-0.000646159
Glanosuchus_macrops		0.0726704	-0.272719	-0.0233447	0.0510056	-0.0134641	-0.0736688	-0.00954739	0.1337	-0.0354931	0.00818087	0.0357302	-0.0239591	0.00116442	-0.0034958	0.0200652	0.00604718	-0.0139054	0.017974	-0.0216553	-0.0169603	-0.00749279	0.00322476	0.0224824	0.00803956	0.00345509	-0.00133472	0.00425873	-0.00222645	-0.00185114	0.00526643	-0.00082566	-0.00267078	0.00159431	3.29669e-05	0.00168193	0.000946644	0.00272206	-0.00373167	0.000797202	-0.000945233
Glaucosaurus_megalops		-0.0798323	0.0141627	0.018605	-0.00473255	0.00724727	-0.0079963	0.0247977	0.00606659	0.0231775	-0.003746	-0.0106243	0.0245968	-0.00351524	-0.00321857	-0.00290945	-0.0113937	-0.0130161	-0.00364676	0.00401205	-0.00430599	0.000386222	0.00130354	-0.000191614	0.000395067	-0.00526938	-0.00392015	-0.000809688	-0.000472569	-0.00224063	0.00235836	-0.00360542	0.0023154	-0.0021617	0.000851228	0.000318716	-0.000886856	0.00012756	0.000309487	0.000578477	0.00070183
Gordodon_kraineri		0.119139	0.0145706	-0.0729118	0.0289219	0.00566721	0.0753082	-0.00929011	-0.0159618	-0.0217784	-0.00592201	0.00393635	-0.00495993	-0.00919316	-0.0130477	-0.00549844	0.00156191	-0.00155	0.00739399	-0.000740368	0.000664886	0.000487624	-0.00129541	0.000123933	0.00183452	0.00231106	-0.00280926	-0.00137591	0.00290121	-0.00023461	0.00541628	-0.00306396	0.00158553	-0.00187405	-0.000479442	0.000204606	-0.00374936	-0.00387792	-0.00107316	3.16575e-05	0.00195358
Greererpeton_burkemorani		-0.0812194	0.0133969	0.00466623	0.000332819	0.00120699	0.0216444	-0.00879132	-0.00727858	-0.00577462	0.0118007	0.00452432	0.000924131	-0.00413868	-0.0105996	-0.00742953	0.00328579	-0.00362445	-0.000891218	0.00162362	0.0107113	-0.00527619	-0.00275959	0.000278621	0.00117235	-0.00199024	-0.00176734	-0.00393119	-6.12592e-05	0.00144282	-0.00157115	0.000477288	0.00146991	0.00010311	-0.00269087	-0.000639437	-0.00122865	0.000555303	0.00069756	-0.000983993	-0.000318541
Haptodus_garnettensis		-0.0134663	-0.0320854	-0.0481766	0.0208598	0.0554451	0.0271038	0.0279879	-0.016397	-0.00282287	0.0099939	-0.0166894	0.000485348	0.00435571	-0.00577224	-0.0103965	-0.00852772	0.00896453	-0.00635004	0.00157221	0.00282498	0.00763062	-0.00306494	0.00505098	-0.00221585	-0.00245306	0.000129582	0.00223369	-0.00110694	-0.00334292	0.00012815	-0.000913469	0.000654678	0.000631569	-0.00205226	-0.00233015	0.00117212	0.000106882	-0.000178084	-0.00102984	0.000638614
Huskerpeton_englehorni		-0.101432	0.0366422	-0.110647	0.0234708	0.0232439	-0.0216186	0.0185706	-0.00378301	0.0310953	0.010159	0.00638701	-0.00698386	0.000649143	0.000624476	-0.000829845	-0.00815822	0.00379462	0.0159719	-0.00926595	-0.00123275	0.00069028	0.00479779	-0.000443697	-0.000919448	-0.000573888	-0.000347651	0.00065737	-0.000916871	0.00370138	0.00286375	-0.00479025	-0.00167097	-0.000647656	0.00280588	0.00090926	-1.82617e-05	6.0824e-05	-0.000132428	-0.000915486	0.000231848
Ianthodon_schultzei		-0.069823	-0.046281	-0.0598654	0.0366807	0.0341655	0.0191164	0.0154924	-0.0361346	0.00546415	0.0138952	-0.0122441	6.61519e-05	-0.00110351	-0.0157275	-0.00172587	-0.00609234	0.00356096	0.000249018	0.00352526	0.00277285	-0.00317023	0.000705685	0.00964122	-0.00113806	-0.00268405	0.00314887	0.00257549	-0.00669365	0.00237489	-0.000352456	-0.000955312	0.000939294	-0.00327801	-0.00510037	-0.000195113	0.000718813	-0.000373129	0.000606548	-9.50725e-08	0.00141348
Iberospondylus_schultzei		-0.170598	-0.033733	0.0820503	0.00853371	0.0150086	-0.0107415	-0.00634222	-0.0219175	-0.00763733	-0.00161862	0.00872499	0.00107809	-0.000273645	0.00102658	-0.00285354	0.0139461	0.00760912	0.00610349	0.000638024	-0.00658123	0.00101645	-0.000418518	-0.000932325	-0.00342223	-0.00104323	0.000570862	0.00227944	-0.0025252	0.00581934	-0.00264805	-0.00027984	-0.00412436	-4.43673e-05	0.000615669	-0.00118299	0.000454363	-0.00242829	0.000514959	0.000509365	0.00123058
Infernovenator_steenae		0.038153	-0.0515955	-0.033972	-0.00800171	0.0577152	-0.00801788	0.0253203	-0.0111809	0.0019202	0.00684786	-0.0316959	-0.0167384	0.0159524	-0.00871465	0.0073469	-0.00310427	0.00520904	0.00253437	0.000182324	0.010172	0.000368174	-0.00824097	-0.00602576	0.00153163	0.0017169	1.98698e-05	-0.00467614	-0.00118725	-0.00883534	-0.00321646	-0.00160966	-0.00113717	-0.00215702	0.00555776	-0.00249945	-0.00199064	-0.00176807	-0.000464183	0.00112272	-0.00356005
Jimusaria_monanensis		0.191639	0.126296	0.011522	-0.0481042	0.0363421	-0.0775693	-0.0617507	-0.0101055	-0.00289902	0.0193898	-0.0266762	-0.0209862	-0.0256781	0.0331059	0.0124749	0.0164249	0.0256346	-0.029584	-0.01099	-0.00197366	-0.00440541	-0.000447288	0.00597815	-0.00824642	-0.00218496	0.00183388	-0.00162576	-0.00278841	-0.00713123	-0.00707197	-0.00387005	-0.00116844	0.000808073	-0.00654023	0.0018879	0.00270049	-0.00230225	0.00175504	0.00148013	0.00306477
Jonkeria_truculenta		0.156457	0.00487469	-0.0193894	0.02829	0.0680218	0.015912	-0.0295945	-0.0180659	0.0171845	-0.0105974	0.00985172	-0.0085432	0.00916905	0.000294673	0.028092	-0.00273991	-0.0151492	-0.0140565	0.0137956	-0.00416105	-0.0058445	-0.00422639	-0.00248083	0.00182609	-0.00115548	0.00647736	-0.00971056	-0.000534699	-0.000549531	0.000291152	-0.00130345	-0.00174813	-0.00047188	-0.0010989	0.000467588	-0.000178554	-0.00107197	-0.000566956	0.00117966	0.000888747
Karenites_ornamentatus		-0.068764	-0.00720345	-0.0847388	0.100692	0.0540413	-0.0178266	0.00182254	-0.0355154	0.0285108	0.00803928	0.0314391	-0.0137824	0.00416702	-0.0103794	-0.00797537	0.00825113	-0.00866238	0.00262231	0.000381873	-0.00890877	-0.000839358	0.00836352	0.00297195	0.0115734	-0.00539986	-0.00659244	-0.00135525	0.00192846	-0.00181026	-0.00790341	0.00109677	0.000336904	-0.00767055	0.00420169	-0.00258748	0.00140665	-0.000320276	0.000124284	-0.000769346	0.000872424
Karpinskiosaurus_secundus		-0.0682379	0.00963983	0.00902884	-0.0170365	-0.000616695	0.00481123	-0.00950716	-0.00766845	-0.0087413	-0.0308245	-0.00232329	-0.00706643	0.00335875	0.00657521	0.0139094	0.00291676	0.000672886	0.00440946	-0.007855	0.000448023	0.00378685	0.000994438	0.000278982	0.00176547	-0.00623285	0.000998346	-0.00215774	-0.0021267	0.000404243	0.00396122	0.00215458	-0.00182581	0.00074389	-0.000802588	0.00127218	-0.000465653	0.00066124	-0.00077617	-0.00112163	0.000257984
Kembawacela_kitchingi		0.26371	0.090799	0.0876333	-0.00849778	-0.045751	-0.0140981	0.000527454	-0.0366924	-0.0448523	0.023461	0.00543948	0.0310167	-0.020716	-0.0111437	0.00128881	-0.0115715	0.0014707	-0.00338643	-0.00847188	0.0208132	-0.00982248	-0.0136927	-0.00456995	0.0196601	-0.00791603	0.0092122	0.0076745	0.00398638	0.00542971	0.00400561	0.00338122	-0.00265712	-0.000467154	-0.00173004	-0.000273471	-0.00164923	-0.00052842	0.00247587	0.00230128	0.00256888
Korkonterpeton_kalnense		-0.16383	-0.00334059	0.0195966	0.0204492	-0.00860904	0.00176557	0.00661264	-0.0167799	-0.0210522	0.0167842	0.0204611	0.000749467	-0.00485769	-0.00475135	0.000945245	0.0126396	-0.00133504	0.00613616	-0.00626277	-0.00711532	-0.00170784	0.00217615	-0.00267233	-0.00386893	-0.00152748	0.00335903	0.00104001	-0.00376091	-0.00622805	0.00247586	0.000135991	-0.00398832	-0.00117593	-0.000873942	0.00144835	-0.000179205	-0.000524078	0.000108343	-0.000354262	-4.58667e-05
Kotlassia_prima		-0.0311577	-0.00194558	-0.0219513	-0.0386763	-0.0139308	0.0135445	0.00216737	0.00921667	-0.00223247	-0.0121619	-0.000404534	-0.0116832	0.00789859	0.00236077	0.0126529	-0.00798664	-0.00241099	-0.00765841	-0.00763525	0.00827632	0.00848608	0.00797706	0.000395997	0.00482376	0.000351212	-0.00029082	0.00115244	-0.000911036	0.0045353	0.0025304	0.00194523	-0.000291527	0.00341933	0.000194841	0.000810393	-0.000609659	-0.000428203	0.000328027	-0.00138297	-2.51338e-05
Kuwavaatakdectes_sanmiguelensis		0.10763	-0.0107302	0.0879601	-0.0866021	-0.0164897	0.0338497	-0.00210483	0.0122246	-0.016233	-0.0196904	-0.00533306	-0.0151397	0.00552858	0.00860242	0.00283348	-0.00844648	0.0036859	0.0102209	-0.000257115	0.0079393	0.00398658	0.00848434	0.00560361	0.0043336	0.00284084	-0.00417138	0.00109535	0.00579096	-0.00074786	-0.0112265	0.00170223	0.00213324	0.0025448	0.00134566	-0.00236967	0.00148314	0.00281567	2.7678e-05	0.00116336	-0.00180977
Labidosaurikos_meachami		-0.0805574	0.0203393	0.057863	-0.0217224	0.00355199	-0.012618	0.044576	0.00562049	0.00229634	-0.00956043	-0.0111947	0.0197216	0.0045794	0.00842579	-0.00118458	-0.0119563	-0.00537609	-0.00331433	0.00130388	0.00224048	0.00895398	0.00529547	0.00133735	0.0025381	0.00761498	-0.00136273	0.00095473	0.00346303	0.000308421	-0.00287124	-0.0023384	-0.000172749	0.000196052	0.0022004	0.00190668	-0.00140769	-0.00078738	0.000799557	-0.000539418	0.000815542
Labidosaurus_hamatus		0.0382431	0.0240094	0.00475747	-0.0355603	0.0169343	-0.0167987	0.0420525	0.0132591	-0.00560165	-0.00628013	-0.0157663	-0.00630222	0.0134851	-0.0137362	0.000158737	-0.000880094	0.00377491	-0.00830154	0.00667272	-0.00697978	-0.00871515	0.00068944	-0.00780877	0.0027437	0.00620889	-0.000377694	-0.00261044	0.00311392	0.00587198	-0.000950252	-0.00149581	-0.00185673	-0.000387803	0.00277462	0.00262497	-0.0021949	-0.00162597	0.000783937	0.00158289	-0.000563213
Laosuchus_hun		-0.159837	0.00521817	-0.0107022	-0.0103027	0.00170237	-0.0146407	0.0227859	0.0131745	-0.00393733	0.00873697	-0.00674227	0.00926636	-0.00851046	-0.00838801	-0.0152807	0.00467319	-1.39801e-05	0.00609152	-0.00279058	0.0063819	-0.00346674	0.00410784	0.00505571	0.000796148	0.00212498	-0.00640323	0.00262429	-0.00174403	-0.000491153	-0.0054829	-0.00126625	0.00172016	0.0013667	-0.00161323	0.000401971	-4.79127e-05	-0.00152647	-0.000963024	0.000429478	0.000565445
Lethiscus_stocki		-0.219547	0.0283748	-0.0240644	0.00392708	-0.0360955	0.00670321	-0.0212592	0.00655519	-0.0066217	-0.00148932	0.0139507	-0.00911446	0.00470147	0.00656548	0.00353016	0.0144237	0.00674325	-0.00709553	-0.00204702	-0.00217886	-0.00761537	-0.00625177	-0.00499181	0.00214197	0.00386383	0.00263888	-0.00260232	-0.00157394	0.000138627	0.00193826	0.000560639	0.0020409	0.000807774	-9.11581e-06	-0.00017293	-0.00100887	0.00143454	0.000326916	-0.000220504	-0.000691545
Leucocephalus_wewersi		0.139852	-0.0114052	-0.11503	0.120575	0.0419255	0.0301987	-0.0116558	-0.0368849	-0.00838162	0.00266254	0.0121658	-0.0191319	0.00165654	-0.0167443	-0.000965726	0.00975421	0.00646212	-0.0106137	-0.0101851	0.000286811	0.00385381	0.0036813	-0.00284105	0.00952254	-0.00221787	-0.00075553	-0.0005058	0.000948868	0.000848416	0.00258962	5.30742e-05	0.00179319	-0.00143876	-0.000673702	0.00504343	-0.00167942	-0.000854201	-0.000681745	-0.000505867	0.000353467
Limnoscelis_paludis		-0.0224724	0.00833353	0.0734291	-0.0142607	-0.020416	0.0210267	-0.0384928	-0.00269283	-0.00847031	-0.031835	-0.0111412	-0.00966085	0.00447208	0.00562144	-0.000279747	-0.00625818	0.00300888	0.0146027	-0.00582069	0.00074627	-0.00500723	-0.00421833	0.00546233	0.00583673	-0.0079456	0.00345275	-9.42823e-05	0.0080913	-0.000631498	0.00152386	-0.0020871	0.00323327	-0.00174266	-6.58571e-06	0.000871411	-0.000349802	-0.000227876	-0.0015875	1.4442e-06	-0.000996907
Llistrofus_pricei		-0.00498741	0.029207	-0.0959694	-0.01285	-0.0208195	0.0298621	-0.0337099	0.0489154	0.0112029	-0.00581	-0.0216684	-0.0174365	0.0242962	-0.00276431	-0.0118674	-0.0011746	0.0103212	0.00638139	-0.00313664	0.0137927	-0.0244034	-0.00237664	-0.0133921	-0.00443327	0.0107589	0.00855963	0.00684154	0.00815551	-0.00620728	-0.000310134	-0.0130679	-0.00506787	-0.00195961	0.00548548	-0.00622156	0.000646745	0.00400219	0.00147803	-0.0017719	0.00360329
Lycaenops_ornatus		0.107307	-0.176279	-0.0181429	0.000156658	0.0162608	-0.0822788	0.00118869	0.0774381	-0.00407729	-0.018996	-0.00473639	-0.0123971	-0.0437913	-0.010113	0.00210242	-0.0041893	0.00396602	0.00644349	-0.00110617	0.00282201	-0.000288047	-0.0308965	0.00904495	0.00475617	0.0136922	-0.00955401	0.00182155	0.012646	-0.00730198	0.0014374	0.00238135	0.00430364	0.00207155	-0.00302731	0.00448816	0.00192206	0.000914141	0.0016093	-9.24107e-05	0.000215179
Lycideops_longiceps		-0.162795	0.00425864	0.0129418	0.00347606	0.0510509	-0.0886412	0.0560465	-0.00586532	0.0316193	-0.0126391	-0.000661256	0.00208395	0.0191057	-0.0107724	-0.00320676	0.00862732	-0.00531063	0.00644624	0.00685211	0.00316919	0.00627696	-7.30254e-06	-0.000173437	-0.00285174	-0.00633297	0.000140235	0.000709936	0.00305474	0.00740643	0.00124772	-0.00156563	-0.00502911	0.00381713	0.00194183	0.00307052	0.00105801	-0.0016406	-0.000313404	4.11933e-05	0.000524773
Lycosuchus_vanderrieti		0.068108	-0.122902	-0.0591729	-0.0114357	0.0216661	-0.0959227	0.0380017	0.00265316	0.00101406	0.00336782	0.0328399	-0.0546803	-0.00415636	-0.00376684	-0.00589343	-0.0129408	0.0101486	0.000862911	0.00873803	0.00627321	0.000466054	-0.0183806	0.0148494	-0.00246711	0.00250487	-0.0101257	-0.000167611	-0.00833458	-0.000844071	0.00328488	-0.0036115	-0.0114739	0.000381616	-0.0026881	-0.00108285	-0.00172812	0.00123685	-0.00188814	0.00378566	0.000141893
Lysorophus_sp		0.106	-0.137085	-0.00389551	0.0730877	-0.0132379	0.0180836	-0.0575909	0.0690952	-0.0125807	0.112209	-0.0351222	0.00730477	0.0350288	0.00217686	-0.0238107	-3.814e-05	-0.0134991	0.000946754	0.00216941	0.0128636	0.00550572	-0.00113333	-0.0100595	-0.00243622	-0.00662024	0.00482596	-0.00290896	-0.0118938	-0.00477636	0.00249642	-0.001992	0.00385035	-0.00212607	0.00478575	-0.000396372	-0.000730751	-0.000733683	-0.000789757	0.00461225	0.000258234
Makowskia_laticephala		0.0215818	0.0128488	0.00597308	-0.00919515	0.0384523	0.0500437	-0.00802314	-0.00761733	0.00745687	0.00389151	-0.00524094	-0.00529774	-0.0118429	-0.002875	-0.00316842	-0.00266478	-0.000501224	-0.00436774	0.000101188	-0.0022745	-0.00635583	-0.00165949	0.000521116	0.00542243	-0.0010157	-0.00762003	-0.000810897	0.00171617	0.00165383	0.00298322	-0.00148299	0.00424808	0.0012671	-0.000129299	-0.00124501	0.001035	-6.66646e-06	-0.000777166	-0.000421549	-1.40003e-05
Martensius_bromackerensis		-0.0770033	0.0182116	-0.0533234	0.0109439	0.0373961	0.00608999	0.00522367	-0.00098976	0.0256363	0.00740535	-0.00126032	-0.00391532	-0.00671685	0.00123352	-0.00587436	0.0001767	0.00966564	-0.000258021	-0.00209044	0.000387978	0.00518031	-0.000753731	-0.0025726	0.00419053	-0.00405304	-0.00132466	0.000915906	-0.0028821	0.000481271	0.00467353	0.000445214	-0.00262713	0.00118247	0.00153394	0.000421026	0.000353845	0.000224031	-8.0977e-05	-0.00199	0.000708483
Megalocephalus_pachycephalus		-0.0831623	-0.0267914	0.154026	-0.0183596	-0.0257141	0.013395	-0.0511166	-0.0137414	-0.0154618	0.00124475	-0.00692022	-0.020663	0.00810689	0.00754895	0.00509516	-0.00197734	0.0040894	0.00335776	0.00288181	-0.00413563	0.0048943	-0.0045092	0.00365414	0.0070726	-8.60333e-05	-0.00190557	0.00044443	0.00278249	0.00219769	0.00119047	0.00260792	0.000661799	-0.00255766	-0.000158335	-2.70686e-05	-0.00177945	-0.000474582	-0.00152192	-0.000226444	0.000331142
Mesosaurus_tenuidens		-0.257284	0.0528606	-0.0979306	-0.00320821	-0.0646914	-0.0264343	-0.00782436	0.0142647	-0.0137	0.00674774	0.0241506	-0.00939577	0.00775253	0.00782718	-0.000840113	0.0230563	0.0128152	-0.00123331	-0.00250463	-0.000356945	0.00598893	0.00126344	-0.00194009	0.00674976	0.00609855	0.00818117	0.00173437	0.00191165	0.00142025	0.000657679	-0.0022212	0.00209574	-0.00158722	0.000792948	-0.000735964	0.00167031	0.000878625	-0.000288841	0.00190661	0.000192856
Microbrachis_pelikani		0.0306738	-0.0227148	0.0400064	-0.0238383	0.0236223	0.0378574	0.0316583	0.00387786	-0.0186819	-0.00341326	-0.0053344	-0.0238851	0.00129302	0.00280721	0.00951681	-0.00951346	0.00998052	-0.0102028	-0.00668293	-0.00864449	0.00794006	-0.00326683	-0.00926968	4.40189e-05	-0.00202735	0.00140118	0.00457695	0.000401503	-0.000164444	-0.000660312	0.00130267	0.000540919	0.00238866	0.000957923	-0.000985452	-0.000659348	-0.000551844	0.00134351	-0.000135555	-0.000671382
Micromelerpeton_credneri		-0.14287	0.00520884	0.0158342	0.000901735	-0.0182303	0.00011119	6.84169e-05	0.0089544	-0.00439315	-0.00398045	0.00815287	0.0351283	-0.00787336	0.00357678	0.000942483	0.00489856	-0.00422969	-0.00156434	-0.00133278	-0.00726835	-0.00668583	0.00310354	-0.00698983	-0.00515264	-0.00526996	-0.00367968	-0.00099269	-0.00164125	-0.0017037	-0.00144946	-0.000739693	-0.00190924	-0.00202932	0.000964647	-0.000536389	-0.000816871	0.000662232	0.000234902	-0.000733998	-0.00049616
Milleropsis_pricei		-0.120858	0.0274448	-0.117425	0.00258123	-0.0125779	0.00647112	0.0481351	0.0285152	-0.000622563	0.014091	-0.00403763	0.00118307	-0.00538675	0.00309578	-0.00399381	-0.00420859	-0.000570466	-0.00385236	-0.00892528	0.00396029	0.00412211	-0.00452288	-0.00626548	-0.00674117	-0.000450963	-0.00118443	0.00213965	-0.00380649	-0.00389756	-0.0013063	0.000272279	0.000462715	0.00209627	-0.00298859	-0.00138245	0.00112005	0.00109908	0.000222639	0.000240054	0.000463976
Moradisaurus_grandis		-0.123597	0.0301479	-0.0241164	-0.0381866	-0.0107077	-0.0183965	0.0329432	0.0218771	0.0320246	-0.0295033	-0.01379	-0.00467365	0.0182772	0.016703	0.0125071	-0.0095897	0.0135814	0.000499993	-0.000228325	0.00667894	0.004441	-0.00070486	-0.00119875	-0.000601751	-5.82272e-05	0.0096896	0.000969131	0.00927506	0.000283548	0.00572473	-0.00163224	-0.000830889	-6.62438e-05	0.00360815	0.00124123	0.00375896	0.000330242	-0.000334472	0.00192168	0.00315686
Moschognathus_whaitsi		0.195756	0.0207999	-0.0837523	0.0534051	0.0240345	0.0367793	-0.0296338	-0.0103475	-0.00442641	-0.0157376	0.0120248	0.0065669	-0.0175866	0.0103673	-0.00151407	-0.00218062	0.00179699	0.00836315	-0.00503855	-0.00938149	0.015004	0.00154394	-0.00529147	-0.00138878	-0.00615148	-0.00336779	0.00105151	-0.00537267	-0.00339104	-0.00475439	-0.00394499	-0.00324706	0.00134508	0.000257449	0.00102843	0.000300172	0.000165452	0.000494884	0.000808097	0.00039579
Moschops_capensis		0.194348	0.0326784	-0.0798842	0.0763759	0.00943389	0.0677276	-0.0668406	-0.024331	0.00896292	-0.00638994	0.0242583	-0.0082551	0.00175968	-0.0169315	0.00720612	0.00346015	-0.013539	-0.00174656	0.0124204	0.00232207	-0.01114	0.0061313	0.00438758	-9.23713e-05	-0.00314751	-0.00213399	0.000995253	0.00814162	0.000900253	-0.00689824	-0.00104766	-0.00320349	7.90876e-05	2.34585e-05	0.000312539	-0.00143768	-0.00144394	0.000405438	-3.4611e-05	0.000211204
Mycterosaurus_longiceps		-0.0969388	0.0134406	0.000284014	-0.00686545	-0.0185531	-0.0128289	0.0222166	-0.00859184	0.00532857	0.00605975	-0.00243172	0.00650287	0.00833351	-0.0118338	0.0031813	-0.00892369	-0.00976227	0.00717514	0.0136804	0.000837144	0.00277307	0.000168491	0.00686685	0.00157355	-0.0011123	0.000328506	0.0024225	-0.000954244	-0.00175894	0.00106512	0.000913958	0.00332167	-0.0015089	-0.000665873	-0.00185925	0.00105654	0.00174735	-0.000508858	0.00103862	-0.00130596
Nagini_mazonense		0.0662538	-0.0670414	-0.0277121	-0.0279565	0.080057	0.0213613	0.00198656	0.00138808	0.00199967	0.0174353	-0.0188883	0.00244749	0.00197244	0.00986684	0.0110686	-0.00829912	0.00984728	-0.00771069	-0.011908	0.0164492	-0.00190984	-0.0118999	-0.0117893	-0.0087762	0.0076226	-0.00798594	0.00159587	-0.000555228	0.00144163	-0.00574408	-0.00165977	-0.00269561	-0.00268225	-0.000394727	-0.00126566	-0.00323768	0.00400768	-0.000724934	-0.00452469	-0.00448126
Neldasaurus_wrightae		-0.146141	0.0188174	0.0146453	-0.011154	-0.0141269	0.000254142	-0.0101343	0.00300069	-0.00677536	0.00488273	0.00675493	0.0218273	-0.00318256	-0.00261326	-0.00827991	0.00110503	0.00112077	-0.00474867	0.0101636	-0.00229738	0.00375107	0.000498928	0.00489257	0.000914042	-0.00140229	-0.00240141	0.000108245	-0.002562	-0.00728095	0.000281704	-0.00265058	-0.00102723	0.0022682	-0.000214017	-0.000860765	-0.000366837	-0.000934491	-0.000918742	-0.00132002	0.000111925
Neopteroplax_conemaughensis		-0.0872149	-0.0653704	0.171123	0.00915082	0.05929	0.0131704	-0.0179842	-0.0294096	-0.0133251	0.0170969	-0.00721457	-0.0194615	-0.00898998	0.00333232	-0.0188711	0.00815574	0.0065794	-0.000113567	-0.00380524	0.00234153	0.000915266	-0.00501537	0.0022352	0.00119802	0.00602372	0.00264895	-0.00102882	0.00227438	5.25095e-05	0.000688877	0.00222331	-0.00399783	0.0029629	0.0016039	0.000731492	-0.000505017	0.00116566	0.00102945	-0.000620963	-0.00111319
Niassodon_mfumukasi		0.201124	0.120682	-0.0969172	-0.0741337	-0.09053	-0.0440022	-0.00730325	-0.0245803	0.0198082	0.056416	-0.0196027	0.00185215	-0.0184137	-0.0148986	0.0248534	-0.00297745	-0.000585188	-0.00124068	0.00333364	-0.0151847	0.01448	-0.019275	0.00714791	-0.0022139	-0.00542584	0.00571373	-0.00113551	-0.00306266	-0.00826867	-0.00804769	0.00126663	-0.00145136	0.00329578	0.00407047	0.00236218	-0.00542983	0.00124921	8.56915e-05	-0.000728661	0.00169136
Nochelesaurus_alexanderi		0.234517	0.0178033	0.145978	0.214389	-0.182208	0.0137965	0.0611374	-0.0325646	0.0188931	-0.0246802	-0.0152585	-0.00184112	0.000108915	-0.029542	0.00532635	0.0134	0.0117451	0.00180588	0.00114405	0.0101704	-0.00764777	-0.003772	-0.000416948	0.00589939	0.0110084	0.0010026	-0.0136072	-0.00494809	-0.00823456	0.00424697	0.00836542	0.00417507	-0.00540229	0.000944249	0.00126922	0.000595445	0.00127391	-0.000722686	-0.00179038	0.00159883
Odontocyclops_whaitsi		0.276833	0.119153	0.0796692	-0.0406706	0.011277	-0.123138	-0.00925271	-0.00867963	-0.0273379	0.0140993	0.0321972	0.02026	0.0380565	0.0203929	-0.0166574	-0.0103104	-0.0039227	0.00744976	-0.010045	0.0025664	-0.00859967	-0.0100084	-0.00913802	0.00487195	0.00322231	0.0108808	-0.00522891	-0.00713818	-0.000295298	-0.00470755	-0.000369443	-0.00415583	-0.00477688	-0.00632175	-0.00379758	0.00455953	-0.00192999	-0.000875794	-0.00305606	-0.00193577
Oestocephalus_amphiuminus		-0.172937	-0.0282114	0.0547471	0.0176033	-0.0241086	-0.000156271	-0.0352372	0.0140554	-0.011787	0.0154784	-0.0056506	-0.00871929	0.0088081	0.00136381	-0.00760263	-0.0058102	0.00872755	0.00173015	-0.0101859	0.00700667	0.0107172	0.00287798	-0.00525619	-0.00173631	-0.00917061	-0.00504279	-0.00470628	-0.00199568	-0.00451886	-0.00383257	-0.000721656	0.0021498	-0.00664609	-0.00213218	-0.00165226	-0.00164452	0.00214791	0.00181183	0.000632845	0.00162384
Onchiodon_labyrinthicus		-0.1204	0.0372539	0.00560883	-0.0114423	-0.0270561	0.0284749	0.00214475	0.014134	-0.000798181	0.0116932	0.0118156	0.0225647	-0.00763337	-0.00404252	-0.0107364	-0.00972237	-0.00283951	-0.00880727	0.0103926	0.000781175	-0.00262005	-0.0011771	-7.0334e-05	0.00451818	0.00504998	0.00227255	0.00110305	5.73924e-05	-0.00403062	-0.000126393	-0.00214512	0.00294177	0.00299988	-0.000580814	0.00113879	0.00117197	0.00036972	0.000130684	0.000120194	-0.000491178
Ophiacodon_uniformis		-0.140437	-0.0119648	-0.0117605	0.0233887	0.0214153	-0.019936	0.00941513	-0.0181071	-0.0141794	0.0140062	0.00691504	0.003861	-0.00633917	-0.0158678	-0.00787462	0.0234436	0.00151732	-0.0014646	-0.00131774	0.0104962	0.00142166	0.00255028	0.0036268	-0.00369352	-0.000621263	-0.0025494	-0.00223929	-0.0026242	-6.09933e-05	0.000746087	-0.00328065	-0.00270227	-0.00306132	-0.00202009	-0.00109456	-0.000108845	-0.000283025	0.00129879	-0.000696542	4.96427e-05
Orobates_pabsti		-0.0434827	0.045622	-0.0654771	-0.0201858	-0.020567	-0.00560386	0.00380872	0.00620261	-0.00731541	-0.027245	0.00378703	0.0034938	0.000805281	0.00281242	-0.00350362	-0.00309735	0.00888176	0.000891142	-0.000822137	0.00228713	0.0151232	-0.0023782	0.00133168	0.00202663	-0.0039459	0.00960239	0.00398793	-0.00613288	0.00149851	-0.000949524	0.00580076	-0.00466262	0.00150636	-0.000148201	0.000924683	-0.000505037	-0.000306814	0.00143402	0.000415001	0.000219634
Orovenator_mayorum		-0.266357	0.0350384	-0.0417448	-0.0168983	-0.048549	-0.039822	0.000750569	0.0164707	0.00468881	0.00383039	0.00970392	0.00800239	0.00101277	-0.00134977	-0.011514	0.00911109	0.00937009	-0.000190135	0.00680417	-0.00410085	0.00911502	-0.00157576	0.00212433	0.00370029	0.00324993	0.00384312	0.00467746	-0.00345816	0.000309268	-0.00127128	-0.000356365	0.00239585	-0.00167588	-0.000391991	-0.000232174	-0.000433369	-0.00055288	-0.000559907	0.00102153	-0.000441149
Oudenodon_bainii		0.152243	0.107	-0.0146843	-0.0540611	-0.00117582	-0.0617171	-0.0440095	-0.0195039	0.00210288	0.00857273	-0.0090065	-0.0107468	-0.0206751	-0.00879757	0.0312028	0.00549695	-0.00447486	-0.00511629	0.00256306	-0.0102484	-0.00710549	0.00938391	-0.00192294	0.00348022	-0.00306325	-0.00519556	-0.00353871	0.00960152	-0.00258212	-0.00156124	-0.00334736	0.00215847	-0.00922309	-0.00209209	-0.0040446	0.00128216	-0.000188886	0.00149784	-0.000375259	-0.000843493
Owenetta_sp		-0.111211	0.0178795	-0.0541399	-0.0529845	-0.0313544	-0.0469177	0.0117048	0.0193926	-0.000416799	-0.0192671	-0.00486338	0.0039974	0.0203912	-0.0117292	-0.0152663	-0.00318888	-0.00487472	-0.0136644	0.00505645	0.0101306	0.00503717	0.00897529	0.0116117	0.00800048	0.00113573	-0.000326409	-0.00465825	0.000923917	0.00530854	0.00213773	0.00396715	-0.00588973	0.00377109	0.000346096	0.000854512	0.000289382	-0.000142208	0.0010342	-0.000578707	0.000404114
Palaeohatteria_longicaudata		-0.0367956	0.00475543	-0.0346374	0.0279933	0.0293806	0.0235085	0.0165935	-0.0122531	-0.00364017	-0.00107472	0.00174856	0.0159747	-0.0126588	-0.00341921	0.000738691	-0.00603806	-0.00253688	0.0036058	-0.00314967	-0.000861604	-0.00311563	0.00306296	-0.00142126	0.000634468	-0.00196816	6.66931e-05	0.00459426	-0.00125136	0.00319848	-0.00165951	-0.00150584	1.69213e-05	0.0016699	-0.000665416	-0.00028466	3.45163e-05	0.000551458	0.000193706	-2.71571e-05	0.000646677
Pantelosaurus_saxonicus		0.106198	0.00745597	-0.0286122	0.0663017	-0.0595421	0.0153083	0.0839962	-0.00539576	-0.0254768	0.0297944	-0.029604	0.0158795	-0.017179	0.033478	-0.01202	-0.0176775	-0.00365175	0.0153723	0.00342771	-0.0257433	-0.0151437	0.00943736	0.0086865	0.00361468	0.00647084	0.00782029	-0.00923293	0.00298665	0.00062697	-0.00381004	0.00249928	-0.0047509	0.00193196	-0.00426162	-0.0017507	-0.000126014	0.00123145	0.000231999	-0.000802877	0.00137386
Pantylus_cordatus		0.012271	0.00186498	0.040148	0.0233596	-0.0223947	0.0331113	-0.0386096	-0.0046056	0.0060836	0.0330127	-0.00220798	-0.00624251	0.0141314	0.0162215	0.015586	-0.00971771	-0.0278815	-0.0039568	0.0132019	0.0104258	0.00087552	0.0049993	0.00375774	-0.00422799	-0.00259302	-0.00383267	0.00120291	0.00297571	0.00521371	-0.00129387	-0.00140357	0.00310062	0.00231605	0.000119633	-0.000439214	-0.00218394	0.000237111	-0.000535289	0.000577449	-0.00254367
Parrsboro_jaw		-0.0897448	0.00674488	0.0960822	-0.0139215	-0.00598949	0.0179464	-0.0231072	0.00977911	-0.00850577	-0.0271196	-0.00925155	0.00327841	0.0180699	0.0132095	-0.00959447	0.00196032	0.00780546	-0.00884924	0.00379722	0.00464936	-0.0199818	-0.00273707	0.00340644	0.00275192	0.000178419	-0.00218214	-0.00812297	0.00252211	0.00174226	-0.00197353	-0.00255665	0.00053973	0.00307547	0.0016552	-0.00219873	0.000895615	-0.00011104	-0.00150568	0.00229719	6.39954e-05
Patranomodon_nyaphulii		0.136008	0.106743	-0.0953212	0.0583652	-0.0860741	0.0143622	-0.0159601	-0.0145007	0.0187222	-0.00768815	-0.0206511	-0.0151601	-0.0189742	-0.00163535	0.00207251	-0.0196947	0.00424008	0.00352671	-0.00544885	-0.00367998	-0.00873942	0.00225468	0.00953448	-0.0138444	0.00840925	-0.00307438	-0.0075889	0.00720641	0.00185606	0.00205065	0.0054838	-0.00375158	-0.00552167	0.00560174	0.00226739	-0.000358554	-0.00259247	0.00197246	0.00109706	-0.00236049
Perplexisaurus_foveatus		-0.14037	-0.0378356	0.22153	0.00714445	-0.00384267	-0.0420502	-0.0389157	-0.0234338	0.0171845	-0.0347404	-0.0276468	-0.023493	0.0107062	-0.00301243	-0.0142827	-0.0175633	-0.00508565	0.0240414	0.0138073	-0.010166	0.0114726	-0.0119676	0.00799946	0.00530352	-0.00170842	0.0106992	-0.00739299	-0.000130179	0.00577869	-0.00310126	-0.00195866	0.00160799	8.17544e-05	-0.00661254	0.000403422	0.00218218	0.00176812	0.00437598	0.000232262	0.00110605
Petrolacosaurus_kansensis		-0.131127	0.00446282	-0.0672322	0.0218584	0.0199151	0.0120191	-0.0110019	-0.015324	0.0240777	0.0146722	0.00495276	-0.00903722	-0.00321977	-0.00173937	0.0103314	-0.00366785	0.00573089	-0.00166749	0.00285116	0.0036282	-0.000450489	0.000218484	0.000397467	-0.000608067	0.00252014	0.00194602	0.000439548	-0.000490954	0.00177974	0.0039317	-0.000237698	0.00259197	-0.000160287	-0.00131174	0.00172877	0.00184047	-0.000661029	-0.000354771	-0.00144082	-0.000426832
Pholiderpeton_attheyi		0.0377182	-0.0805158	0.161757	0.00718953	0.0225752	0.0539346	-0.0160184	-0.000208546	-0.0104129	0.0331639	-0.00912947	-0.010025	0.00179389	0.00783278	0.0158301	-0.000891724	-0.00536745	0.011222	-0.0084473	-0.00710499	0.0055848	-0.00243875	-0.0125366	-0.00157813	-0.00546674	0.00285132	0.00226192	0.00371589	-0.00253802	0.00245261	-0.000825025	-0.0002974	0.0016176	0.000699099	0.00117674	-0.0006989	0.000173267	0.000687557	-0.000423584	-0.000586804
Pholiderpeton_scutigerum		-0.0149141	-0.0726571	0.173777	0.0186928	0.0399923	0.0411293	0.00493004	-0.0211078	-0.00271203	0.00960678	-0.0107189	-0.000846024	-0.00448925	0.00921594	0.0128914	0.00270115	-0.00477941	0.0086235	-0.00313754	-0.00636344	-0.00186621	-0.000838013	-0.00653946	-0.00763612	0.00142559	-0.00303767	-0.000367854	0.000473471	0.00231639	0.000690184	0.00357713	-0.00253248	-0.0049097	-0.000808477	0.000247453	-0.000589518	0.000935996	0.00117142	0.000383554	0.00162938
Phonerpeton_pricei		-0.146965	-0.00500711	0.0334119	-0.000723516	0.000778144	-0.00193844	-0.0116003	-0.00936425	0.0217173	-0.0105739	-0.00445864	0.0214366	-0.010786	-0.00305004	-0.00305602	-0.0110529	0.00681738	0.00557363	0.0137645	-0.00416595	-0.0047941	0.00142383	0.0033767	-0.00320655	-0.00289552	-0.00595253	0.00333301	-0.0038844	0.00419968	-0.00317266	0.000359043	-0.00292373	-0.00409089	0.00130464	-0.00114842	0.00151408	-0.000542636	-0.000518154	0.000220818	0.000658652
Phthinosaurus_borissiaki		0.063923	-0.00115695	-0.0141851	0.0139835	0.0534216	-0.0116245	-0.011068	-0.00790781	0.0197959	-0.0373305	0.010772	0.0178679	0.0146313	0.00414859	0.00145838	-0.000205999	-0.0022829	0.0140061	0.00670342	-0.00695328	-0.00974769	-0.00409886	-0.00402441	0.00438971	-0.00883266	0.00481672	0.000453256	-0.000578045	-0.00644785	0.000871477	0.00330262	-0.00110353	0.000930041	0.00162311	9.01452e-06	0.00025902	0.00307793	-0.00230524	0.000340004	-0.000887675
Pointedward_jaw		-0.0145263	-0.0374	0.116939	0.0192157	0.0348184	0.0582975	-0.0254478	-0.0260897	0.0185908	0.0219043	-0.00280729	-0.00431216	-0.00810882	0.0122507	0.000283246	-0.00643341	0.000446254	0.00347029	0.00580966	-0.0021733	-0.00716453	-0.00327682	0.0053696	-0.00411151	-0.00161169	-0.009147	0.00493788	0.0005328	-0.000858025	-0.00417109	-0.00199357	-0.00211129	-0.00115642	0.00168876	-0.00302291	0.00213128	7.86945e-05	-0.00212229	-2.65931e-05	0.000179065
Proburnetia_viatkensis		0.0315781	-0.00976616	-0.0241653	0.0887038	0.0405058	-0.017291	-0.0174598	-0.0625387	-0.0484019	-0.0196871	0.0117766	0.0074387	0.00634375	0.00950966	-0.00326704	0.0159908	-0.0085987	-0.00797001	-0.0136856	0.0122362	-0.00361398	-0.00816262	0.0156877	-0.000960237	0.000190265	0.000613229	0.00217434	0.00561476	-0.00470458	0.00110103	0.00371921	0.00748809	0.00300599	0.00384045	-0.00116371	-0.000452911	0.00528035	0.00293419	0.00310959	0.000491388
Procynosuchus_delaharpeae		-0.0174961	-0.0218633	-0.0549885	0.071983	0.0443856	-0.0211822	0.00342449	-0.0138745	0.0555176	0.0219796	-0.00184135	-0.0157502	-0.00371687	0.0311667	0.0147088	0.00258311	0.00965158	-0.00566992	0.0100321	-0.00904278	0.00907056	0.0062847	0.00183218	0.00672052	0.00931982	0.000150219	-0.00409495	0.00745164	0.00541268	0.00535351	-0.00134378	0.00499973	-0.0027249	0.000123437	0.00129755	0.00234065	-0.00290819	-0.0011665	-0.00096919	-0.000283744
Protocaptorhinus_pricei		-0.0345141	0.0330347	0.000157268	-0.0157971	0.0329342	0.0400763	0.0105747	0.02231	0.0404051	0.0184853	-0.0067031	0.0102461	-0.0151434	-0.000642796	-0.0108549	-0.0222677	0.000920269	-0.00864229	-0.000484859	-0.00138631	-0.00128226	0.00207283	-0.00510449	0.00333734	-0.000543395	-0.00751276	-0.000269856	0.00198433	-0.00195693	0.001911	0.000487817	0.00257185	0.00191603	0.000104344	0.00332279	0.00204188	0.00101931	0.00214886	0.000123219	0.000545008
Protorothyris_archeri		-0.104259	0.0155357	-0.05249	0.0113826	0.0183834	0.00483003	0.0130556	-0.000953971	0.00130151	0.0115934	0.00502542	0.00097265	0.000498229	-0.00423555	-0.00186198	0.00211923	-0.000482532	-0.00915004	0.00141001	0.00613975	-0.000361149	-0.00311405	-0.00133503	0.000233449	-0.00374929	-0.00118289	-0.00236372	0.00332018	-0.00202302	0.00292549	0.000599794	0.00141467	0.000916452	-0.00175219	-0.000334353	0.000195753	-0.000452331	-0.000717452	-0.000948816	2.70719e-05
Purlovia_maxima		0.237852	0.00111363	-0.0924256	0.0304271	0.0552652	-0.0392593	0.0174338	-0.0282034	-0.0259451	-0.0126859	0.0258284	-0.030392	0.0494528	-0.0120253	-0.0120074	0.0139878	0.00623246	-0.0187159	0.00522602	-0.0162951	0.0231888	-0.00456596	-0.0153266	0.00667739	0.00540941	-0.00871083	-0.00894609	-0.00152719	-0.00470901	0.00103886	-0.00734761	0.00129191	-0.000897568	-0.000814907	0.0015679	0.00166441	0.00229835	0.00340217	-0.00196409	-0.00133736
Rastosuchus_hammeri		-0.109606	-0.0097739	0.0542748	4.82099e-05	-0.0176549	0.00905766	-0.00430349	-0.0028866	-0.0146492	8.18331e-05	0.00220362	-0.00826118	0.00615363	-0.0109551	0.0211713	-0.012322	-0.0227187	0.00321211	-0.00291336	0.00531406	-0.00119958	0.00877445	-0.000832024	-0.0102849	-0.000709664	-0.000411506	0.000482771	0.00119627	-0.00557625	0.00153062	-0.00370798	-0.00334987	0.00384074	-0.0043648	0.00765535	-0.00153157	-0.000125382	0.00112982	0.0001869	-0.000785441
Reiszia_gubini		-0.131149	0.00935367	-0.0245199	0.0455168	0.00778592	-0.0225974	-0.0103668	-0.0237204	-0.0187167	0.0166676	0.0295785	0.0225522	0.0112575	-0.00160333	0.00527994	0.000978434	0.00102168	-0.00224976	0.0113454	0.00563019	0.010007	0.000730855	0.00901732	0.000591261	0.00138912	0.00515811	-2.68462e-05	-0.00184354	-0.00362254	0.00355815	-2.05007e-05	0.00173418	0.00136045	0.00286787	-0.000533173	0.00251035	-0.00206541	-0.000317951	0.00209493	-0.00100517
Rhachiocephalus_magnus		0.0912713	0.0882215	0.016549	-0.0691276	0.00604272	-0.0596081	-0.0370691	-0.0111824	0.00943155	0.0109426	0.00269008	-0.00675132	-0.00212395	-0.0224076	0.011038	-0.00594931	0.00721336	0.0152101	-0.00486744	0.00979136	-0.00179299	0.00563646	0.000225598	0.00224037	-0.00477157	-0.00842663	0.00589868	-7.0779e-05	-0.00111064	0.00656249	-0.000716838	-0.000666587	-0.00130422	-0.0043522	0.00511768	0.00214196	-0.000756591	0.00273305	-0.00162321	-0.00277066
Rhinesuchus_whaitsi		-0.101584	-0.0210124	0.0922849	-0.00112873	-0.00236623	0.00119919	-0.0370295	-0.0207999	-0.0290597	0.00825556	0.00497019	-0.0176369	-0.00138842	-0.00215389	-0.00259608	0.00401631	-0.00324343	0.0046972	-0.00605053	-0.000763669	0.00296877	0.000459982	0.00242445	0.00909581	0.000524783	0.00122961	-0.00310315	-0.0014041	-0.00234923	0.00113824	-0.00330105	-0.00253729	0.000378346	-0.00201659	0.000316835	-0.00264419	-0.000210518	0.000865099	-0.00186087	-0.000876387
Rhodotheratus_parvus		-0.00808103	0.00727693	-0.0171953	-0.0184371	0.00587603	0.0222054	0.0551084	0.0206105	-0.0134916	-0.00521022	-0.0172673	0.0246606	-0.00236111	-0.000380545	-0.00832768	-0.0138925	-0.00134194	-0.00635675	-0.000495062	-0.00243625	-0.00115638	-3.16731e-06	-0.000237753	0.00338087	-0.00202546	-0.00210165	-0.00216906	0.00180492	-0.00165116	-0.000344361	-0.00194995	0.00206914	0.000794071	-0.00010726	-0.00169621	0.00196886	-0.0007449	0.00131364	0.00137996	0.00190565
Sauroctonus_parringtoni		0.0838541	-0.104004	-0.0202646	0.10277	0.0233981	-0.0439804	-0.101617	0.0583827	0.00221122	-0.00342896	-0.0546055	-0.0131331	0.0109611	-0.0235013	-0.0230836	0.0018892	0.0129567	-0.0152282	-0.0112372	0.00166215	-0.00515059	0.0155095	0.00753863	-0.00599256	-0.0129332	0.0139271	-0.00300585	0.0044748	0.00609546	0.00599624	-0.000149925	0.00632512	-0.0012437	0.00374522	0.000930233	0.000437793	0.000969688	-0.00101124	0.00110683	-0.00331396
Sauroctonus_progressus		0.0912361	-0.423969	-0.0583742	-0.240463	-0.166109	0.00179352	-0.056313	-0.136967	0.123319	0.0131657	0.00405929	0.0504494	0.024381	-0.0336379	-0.00570565	0.00814622	-0.00606291	-0.0105592	-0.0368333	-0.0128766	0.00275122	0.00290314	0.00360233	0.00285926	0.00883856	0.00234506	-0.00223617	0.00763161	-0.00427186	0.0018473	-0.00245418	-0.00141308	0.00368254	-0.00270329	-0.0024673	-0.00158286	-1.54928e-05	0.000205565	0.00115069	-0.000440905
Sauropleura_scalaris		-0.17476	0.0288672	-0.0275293	0.0115179	-0.0264825	0.0395426	-0.0103655	-0.000176367	-0.00344229	0.0188866	0.0104388	-0.00596242	-0.0195056	-0.00421674	-0.010874	-0.00470778	0.00270131	-0.00509849	-0.00486239	-0.00531651	0.0044143	-0.00217235	-0.00318762	0.00152391	0.00267466	0.00288821	0.0067355	-0.00351925	-0.00549018	0.000581625	-0.00114519	0.00369008	0.00245515	-0.00185903	-0.000782115	-0.000139152	0.00063644	-0.00136162	-0.00124879	-0.000376823
Sclerocephalus_haeuseri		-0.120678	0.00328762	-0.000590596	0.010706	-0.00648367	0.0238513	-0.000845499	0.000850602	-0.0110878	-0.00830379	0.0140471	0.0179978	-0.00475092	0.00948045	0.0109774	0.00677186	-0.00630689	-0.00204467	-0.00637313	-0.00392014	-0.00134837	0.0051092	-0.00222267	-0.00315513	-0.00415801	-0.00112009	-0.000970254	0.000451206	-0.00253401	0.00213578	-0.000980644	0.00116376	4.74588e-05	-0.000785712	-0.000852082	-0.000458866	0.00107566	0.00046977	-0.00184522	0.000492109
Scutosaurus_sp		0.325984	0.261454	0.299195	-0.135779	0.088287	0.0708678	0.0576005	0.108166	0.0739749	0.0583219	0.100342	0.0147008	0.00252437	-0.0214252	-0.0113178	0.0066106	0.0213063	-0.00496889	-0.00666882	-0.00297346	0.0072236	0.00889397	0.0130377	-0.0142689	-0.00246932	0.00951626	-0.0109217	0.00887602	0.00305701	-0.00408954	0.0043315	0.00372919	-0.00179958	-0.000203932	0.00404959	-0.00321005	0.00442854	-0.000632377	0.000125142	0.000222341
Scylacosaurus_sclateri		-0.0306083	-0.0223219	0.0851793	0.031912	0.0462783	-0.0136299	-0.0550295	-0.0453466	-0.00686493	-0.00780551	0.0102094	0.0168753	0.012648	0.0214388	0.0314455	-0.00476532	-0.00983722	-0.0262919	0.0176664	0.00847942	0.00424278	-0.0074841	0.00601723	-0.00200198	0.00808073	-4.36176e-07	-0.00303876	-0.0078951	0.000234845	-0.00209223	0.00371047	-0.00770459	0.000360607	0.00411428	0.000815367	-0.00125108	0.00174651	-0.000549219	0.000778212	-0.00090664
Secodontosaurus_obtusidens		-0.117163	0.0193326	-0.0603921	0.049002	0.0151002	-0.0554208	0.0248789	-0.0123208	-0.0117336	0.0236393	0.00708071	0.0251735	0.0042346	0.0263072	-0.0070019	-0.00232402	-0.0105582	-0.00297993	-0.00698798	-0.00221929	0.00412099	-0.0117411	0.00122104	-0.0062687	-0.00177581	0.000749992	0.00230987	0.00340611	0.00323431	-0.00196591	0.00150269	0.00189736	0.00287127	-0.000201524	0.00172715	0.00034315	0.000382486	0.000637277	-7.28009e-05	-0.000812002
Seymouria_baylorensis		0.0102956	-0.0136209	0.0376877	-0.000700513	0.033437	0.0370261	0.0303496	-0.00425598	-0.00279446	-0.00462941	-0.00502868	0.00550622	-0.00939618	-2.91712e-05	0.0102343	0.00754254	-0.00321736	-0.0021706	-0.00684461	0.00507459	-0.0134889	-0.00525709	-0.00635804	0.00538007	-0.00217571	0.0033311	0.00116555	0.00521	0.000303849	-0.00125413	-0.00208149	-0.00303253	0.00116834	0.00332563	0.00132391	0.000684171	0.000782675	-0.000984075	-0.00104523	6.12111e-05
Shihtienfenia_permica		0.101749	0.0485586	-0.0372844	-0.0134124	0.0073576	0.0435515	-0.0527058	0.00427412	0.0207765	-0.00117757	0.00400671	-0.0143573	0.0121758	0.00360294	0.00380844	0.00673033	0.00808096	0.00480756	0.00884474	0.00237776	-0.0138513	-0.0168131	-0.000124003	-0.00268809	0.00649941	0.00655404	-0.0108504	-0.00389327	-0.00522978	-0.0077035	0.00246888	0.0059249	0.00301754	-0.0040457	0.00437062	0.000521901	-0.00479271	-0.00261361	0.000117289	0.000607939
Sigournea_multidentata		-0.119549	0.0669554	-0.0867035	-0.00926631	-0.0433923	0.0123054	-0.00636823	0.0150338	0.0044178	-0.00822219	0.00883413	-0.00193477	0.00319972	0.000715306	-0.00538278	-0.00139921	0.0065153	0.00477654	0.00072798	-0.0023873	-0.000940616	-0.00315158	-0.00113129	0.000734986	0.00180192	0.00711391	0.000138445	0.0017079	0.00175359	-3.42976e-05	-0.00152141	-0.00161945	-2.81226e-05	0.00042524	-0.00115769	0.000313316	-0.000281299	0.00119121	-1.53101e-05	-0.000116447
Silvanerpeton_miripedes		-0.0985371	0.0261758	-0.00342723	-0.00855532	-0.0120765	0.035961	-0.00319574	-0.000494052	0.0018243	0.0119417	0.0105045	-0.000617517	-0.00208867	0.000856842	0.00945339	-0.00414075	0.000977988	-0.00184162	0.00613898	0.000976453	-0.00155342	-0.00107804	0.000493895	0.00328112	0.00350273	0.00307591	0.00106088	0.00220366	-0.00193564	0.00178464	0.00143239	0.00150856	0.000109123	0.00138238	0.00133985	0.000812955	0.000511373	-0.00109347	-0.000201328	-0.000199838
Solenodonsaurus_janenschi		-0.101169	0.0167324	-0.0370206	-0.00867036	-0.0115346	-0.00446182	-0.00749924	0.00420596	-0.00153466	-0.0256104	0.00729499	-0.00132564	0.00828052	0.00859782	0.0161261	0.00893695	-0.00439231	0.00159927	-0.00289509	0.000794836	-0.00631491	-0.00138058	-0.00279476	0.0015788	-0.00326554	0.00110059	-0.00558239	0.00323138	0.00174362	0.00293571	0.000940523	-0.00128475	-0.00101461	-9.99341e-05	0.000602725	0.000778048	0.000630781	-0.000373335	0.000173484	-0.000673223
Sphenacodon_ferox		0.107513	-0.0529634	-0.0134443	0.0652668	0.0524392	0.0334008	0.0298077	-0.0418907	-0.0112344	0.00107471	-0.00430383	0.0128676	-0.0059987	-0.0067151	-0.000326097	-0.00631321	-0.00710141	0.00972119	-0.00399447	0.00559522	-0.00839907	0.000494869	0.00620772	-0.00446961	1.43072e-05	0.0122416	0.00114567	-0.0031997	0.00197529	-0.00472253	-0.000817891	0.000157576	0.00393168	-0.00233146	0.0014103	-0.000641921	-0.000609489	0.000934531	-0.00143747	0.000609221
Spinarerpeton_brevicephalum		-0.0695991	0.0213483	-0.0155348	-0.010648	0.0168555	0.0256584	-0.0194426	-0.00368046	0.0154503	0.00950346	0.00150066	-0.00521526	-0.0080897	-0.007766	-0.0045871	-0.00645587	-0.00105603	-0.00314244	0.00690125	-3.00993e-05	-0.0103834	0.000662355	0.00121888	0.00735435	0.0016181	-0.00506415	0.000461824	0.000570949	0.00120656	0.0018297	-0.00203048	0.000548868	0.00224191	-0.000238594	0.00168092	0.000613115	-0.000246394	-0.000660238	-0.0006905	-0.000172469
Stenokranio_boldi		-0.125624	-0.0318686	0.0977829	-0.0267531	0.029337	-0.0312736	0.0363128	-0.0195803	-0.0101464	0.0041738	-0.00611001	0.0113453	-0.0146938	-0.0226671	-0.0176468	0.0197274	-0.00504695	0.00785707	0.0024683	0.00275347	-0.0041779	0.00546769	0.00216077	-0.0142442	-0.000998823	-0.000860208	0.00370344	-0.000826882	-0.00604482	-0.00122276	-0.00184221	-0.0057307	6.03675e-05	-0.00125422	0.00170431	0.00183971	-0.000525236	0.000405988	0.00362174	-0.00152045
Suchogorgon_golubevi		0.12229	-0.144274	0.0171419	0.129181	0.0378739	-0.0246628	-0.0645786	0.0421403	-0.0115658	0.00362289	-0.00618593	0.01335	0.000153237	-0.0333931	0.00635046	-0.0124306	-0.0109979	-0.00570976	0.0040367	-0.0102127	0.00221283	0.0158638	0.000777324	-0.000676418	0.00212044	0.0130974	0.00349772	0.00331757	0.00872056	-0.0042299	-0.00140303	0.00456592	0.00287132	0.00049583	-0.000559617	-0.00112454	-0.0015109	0.0011533	-0.00229882	0.00236954
Suminia_getmanovi		0.138361	0.0904023	-0.128639	0.0751674	-0.0632543	0.00116477	-0.034832	-0.00959725	-0.0130151	-0.0298438	0.035187	0.0187089	0.0298672	0.0365375	-0.0293265	-0.0157486	-0.00872915	0.0170829	-0.00256028	-0.00862721	0.0135407	0.000750939	0.00111433	-0.00650642	0.00424486	-0.00114317	0.00448873	0.011695	-0.00549997	-0.00528933	0.0101308	-0.00637545	-0.0011059	0.00616396	0.00212853	-0.00280504	-0.00280916	0.00194351	-0.00132717	-0.000676937
Syodon_efremovi		0.00923255	0.0176463	-0.0313541	0.0344207	0.0626371	-0.0208531	-0.0391044	-0.00979203	0.0395138	-0.00912181	-0.011904	-0.0196475	0.0126204	-0.00559804	-0.0345698	-0.00828703	-0.0072081	-0.0001312	0.0043703	0.00487473	0.000451412	0.00147654	0.000542404	0.00681401	-0.00595121	-0.00136736	0.00190718	0.000298941	-0.00388185	0.00111599	0.00354899	-0.00498625	-0.000480866	-0.00305539	0.00161926	-0.00203016	0.00138931	-0.00175913	-0.00164107	0.000492102
Tapinocaninus_pamelae		0.0580157	0.0304661	0.0559306	-0.0461177	0.0532586	-0.00726361	-0.0078437	-0.0187256	-0.0110104	-0.0220581	-1.0349e-05	-0.0125218	0.00889771	-0.000506193	-0.00147296	-0.00979558	-0.0171099	-0.0053168	0.00353328	-0.00586794	0.011506	0.00460566	0.000566361	-0.0019778	0.00505138	-0.00143828	-0.00583708	-0.00775768	-0.00563192	-0.000865864	0.00140911	0.00748076	0.0101863	0.000634874	-0.00262623	-0.00050403	0.00114265	-0.00310688	-0.0011245	0.00144272
Tetraceratops_insignis		0.0189651	-0.0424267	0.0450653	0.050431	0.0402835	-0.0186771	0.0776683	-0.0360811	-0.0179908	0.0366694	-0.026315	-0.0331996	0.00317542	0.0159436	-0.00840736	0.0189502	0.00150909	-0.00195727	-0.00302944	0.00909178	0.00415237	0.00352793	0.00608263	-0.000125247	0.00583212	0.00830363	-0.00428024	0.0136512	-0.00789113	-0.00433979	0.00135233	-0.00161094	-0.000168431	-0.00139641	-0.000571565	0.00176256	-0.0017552	-0.00243861	-0.000980494	0.000113544
Titanophoneus_potens		0.019951	0.00548616	-0.0273475	0.0407931	0.057326	-0.049776	-0.0164583	-0.0173265	0.0278319	-0.0309718	0.000657174	0.00450817	0.0115427	-0.0147547	-0.0192569	-0.00186443	-0.00494515	0.00655199	0.00944972	-0.0121901	-0.00182658	-0.00487031	-0.00358386	-0.00070894	0.00247431	0.00105687	-0.00713157	-0.00668022	-0.00128587	0.000643164	0.00372664	-0.00105627	0.000203026	0.00116888	-0.00277115	-0.000932597	0.00322826	0.000806405	0.000624142	-0.000200102
Tramuntanasaurus_tiai		-0.10788	-0.0130594	-0.0298647	0.000335883	-0.00425754	-0.0174344	0.0348972	0.0071776	0.00659878	-0.0150308	-0.0147933	0.0125305	-0.00127203	0.00692807	0.00927197	-0.0127973	0.00450673	0.00812234	-0.0106262	-0.00474556	0.00121452	0.00145435	-0.00544196	-0.00595153	0.00152418	0.00519704	-0.00355576	-0.00331647	-0.00476759	-0.00124251	0.000771309	0.0020536	-0.00227534	0.000131111	-0.00106388	0.00242731	0.00091102	0.000253376	0.000353418	-8.35802e-05
Trimerorhachis_insignis		-0.17055	-0.0186082	0.0739523	-0.0104202	-0.0201191	-0.0169236	-0.0159402	0.00648948	-0.0145918	0.00231144	-0.014588	-0.0105209	0.000564962	-0.00535663	-0.0179006	-0.000107052	0.0164137	0.00871944	-0.00926805	0.000722807	0.0006737	0.00156275	0.00223889	0.00268685	-0.0062233	-0.00491293	-0.00166899	-0.00270539	-0.00044204	-0.00551714	0.00195667	-0.00156698	-0.00143386	-0.000261802	-0.00122473	-0.00196233	-0.00107129	-0.000850946	-0.000353068	0.000675085
Tseajaia_campi		-0.0106502	0.0180005	0.0950332	-0.0386246	-0.00789971	-0.00476936	0.00755314	0.00682183	-0.00637076	-0.0298188	-0.00836655	0.0153856	0.00185681	0.00788004	0.00852186	0.00714303	-0.00272327	0.00614246	8.41011e-05	-0.00141663	-0.00360593	-0.00361153	-0.00406099	0.00189559	-0.00347501	-0.00177116	-0.0056956	0.0051694	-0.000259116	0.00137248	-0.00386552	-2.54002e-05	-0.000593581	0.00059008	0.00226691	0.000734319	-0.0007792	0.000248307	0.000840243	-0.000423369
Ulemica_invisa		0.219539	0.0595206	-0.0408399	-0.0168281	0.0813678	-0.042206	-0.031036	0.0130815	0.00885627	-0.00468661	-0.00115641	0.00786948	0.00473949	0.0220669	-0.00905675	-0.002568	0.0192659	-0.00172449	-0.00810024	-0.010224	-0.0151741	0.00442361	0.00182114	0.00714768	-0.0113099	0.00168643	0.00231252	-0.00567397	-0.00878496	0.00263444	0.0093416	0.00276806	0.00283473	-0.00185206	0.00114731	0.00336831	-0.00265942	0.00213698	0.000701929	-0.00152517
Ulemosaurus_svigagensis		0.221912	0.00718463	-0.0347854	-0.000851426	0.0141209	0.00496137	0.0125075	0.0154756	-0.0188932	0.00238936	-0.0127625	0.0306937	-0.00519128	-0.0117112	-0.0047198	-0.00381495	0.00850792	0.0100449	0.00226509	-0.00406762	0.00240838	0.00893112	-0.00267639	0.00356147	0.000266097	-0.00745954	0.000318136	-0.00935018	-0.00177763	0.00955459	0.000558795	0.00122172	6.62687e-05	-0.000112274	0.000507908	-0.00196534	-0.00124503	0.00299408	0.000753366	0.00113602
Utegenia_shpinari		-0.037649	0.0318583	-0.0452538	-0.0144698	0.00695121	0.0142929	0.00404831	0.00462376	-0.0032411	-0.0159371	0.000790522	-0.00221288	-0.00243984	0.00120377	0.00691857	0.0022426	0.000180961	0.00103937	-0.00272991	0.000877125	-0.00328757	0.00309922	0.00051564	0.00371443	-0.00348276	-0.00316713	-0.000304916	0.00064734	0.00354551	0.00151446	-0.000438474	8.74015e-05	0.00157925	0.00024679	-0.0003942	0.000122793	-0.000181142	-0.000567824	-0.000180696	-0.000110168
Varanops_brevirostris		-0.165022	0.0193335	0.0523074	-0.0309768	-0.0344347	-0.00650836	0.00648094	0.00595319	-0.00580269	0.000767847	-0.00698254	0.00853521	-0.00596308	-0.00448308	0.00195343	-0.000963862	-0.00518935	-0.000466087	0.00463207	-0.00308315	0.00481669	-0.000158873	0.00286797	0.00229414	-0.00205501	-0.00367099	0.000833807	0.00151374	-0.00379854	0.00174802	-0.00103726	0.00371825	-0.00020706	0.00130327	-5.88471e-06	-0.000818494	4.32681e-05	-0.00158245	-0.000918338	-0.000844469
Varanosaurus_acutirostris		-0.191698	-0.00478513	0.0287877	0.00958648	0.00245193	-0.0203416	0.00672771	-0.0133786	-0.00206021	0.00948025	0.0114409	-0.000755649	-0.00524778	-0.00730963	-0.0014265	0.0182407	0.00604235	-0.00459981	0.00521968	0.00111348	0.00528982	-0.000104571	0.00115366	-0.00343544	0.00547921	0.00365351	0.00339454	9.52231e-05	0.00274569	0.0032396	-2.81782e-05	-0.00347992	-0.000921874	0.000224841	0.00165528	0.00199525	-0.000688533	0.00178494	0.00115624	-0.000856876
Viatkosuchus_sumini		0.0748626	-0.0208685	-0.0983598	0.117734	0.0421367	-0.0233668	0.0196706	-0.0213044	0.00698469	0.0115958	0.0381117	0.00211948	0.0101142	0.0040899	0.0122007	0.0116288	-0.0152732	0.00417005	-0.00430802	-0.0102828	0.00416518	0.00195656	-0.00410453	0.0073534	-0.00708868	-0.0120052	0.00493143	0.00490669	-0.00317474	-0.0124475	-0.000491824	-0.000334867	0.000358796	0.00749127	0.00249747	0.00265012	0.000391779	0.00227036	0.00211993	0.000779207
Weigeltisaurus_jaekeli		-0.139028	0.0369126	-0.116442	0.015647	-0.0256334	-0.0208946	-0.0141005	0.0301425	0.0204323	0.0181639	-0.00032334	-0.00967904	-0.0110813	0.000909365	-0.0130995	8.91132e-05	0.00624664	-0.00184359	-0.000397786	-0.00640477	0.000931365	-0.00536216	0.00159691	-0.000104358	0.0050243	-0.00686857	0.00156538	-0.00386276	0.00284198	-0.00111478	0.00634048	-0.00252132	-0.00166037	-0.0023501	-0.00184713	-0.000710404	0.000634327	-1.943e-06	-0.000245011	0.00144911
Westlothiana_lizziae		-0.0759234	0.0367695	-0.0990685	-0.0148992	-0.0159103	0.0183386	0.00800998	0.0208296	0.00582066	0.011148	0.0032748	0.0117787	0.00304938	-0.00405239	0.00105136	0.00482503	-0.00200363	0.00780036	0.00785924	0.0081944	-0.00519287	-0.00430983	-0.00312772	0.000552716	-0.000378866	0.0032214	-0.00452428	0.00204391	-0.00191237	0.000339143	-0.00274426	0.00258612	0.00239604	-0.000201366	-0.000100058	0.000943472	-0.000673088	-0.000372409	-0.000311904	-0.000241901
Whatcheeria_deltae		-0.0911428	-0.0217903	0.139289	-0.0296947	-0.014052	-0.0134545	-0.0217156	0.0145116	-0.0168039	-0.00107516	-0.00799874	-0.0164568	0.00281998	-0.00044567	-0.0134677	0.00313544	-0.00278444	-0.00855082	0.00312681	0.00565057	0.0106317	0.00424136	0.00976634	0.0108735	-0.000968652	-0.000740131	7.42779e-05	0.00401178	-0.0021205	-0.000435638	0.00125247	-0.0043993	-0.0010131	-0.000527178	4.23481e-05	-0.000604583	4.64933e-05	-0.000574117	-0.000435017	-5.44584e-05
Youngina_capensis		-0.189338	0.0498353	-0.052993	-0.017681	-0.0496225	-0.0322406	-0.013119	0.0159662	0.0183652	-0.00203468	0.00173861	-0.00104639	-0.00485267	-0.00487224	-0.00689882	-0.0111833	0.00659211	0.0064205	0.00160241	-0.0104703	-0.00752808	-0.00877841	-0.00345042	0.00193022	0.00127163	0.00150048	0.0041515	1.68191e-06	0.00349992	-0.000889896	0.00272823	0.000322482	-0.00243011	-0.000985929	0.000677434	-0.00297075	0.000179449	-0.000844353	0.00220763	-0.000975621

## Sheet: G Lateral PCA Morphospace
Comparison	Following phylogenetic hypothesis:	dispRity			PERMANOVA
		W	p		F	p (adj.)
Amniotes vs. Non-amniote tetrapods	Hypothesis 1	1000000	0		22.4408	0.001
Amniotes vs. Non-amniote tetrapods	Hypothesis 2	1000000	0		26.1378	0.001
Amniotes vs. Non-amniote tetrapods	Hypothesis 3	1000000	0		26.8366	0.001
Amniotes vs. Non-amniote tetrapods	Hypothesis 4	1000000	0		26.7016	0.001
Sauropsida vs. Non-amniote tetrapods	Hypothesis 1	5797	0		4.89491	0.009
Synapsida vs. Non-amniote tetrapods	Hypothesis 1	0	0		43.5564	0.003
Synapsida vs. Sauropsida	Hypothesis 1	705696	1.19369e-56		6.17703	0.003
Sauropsida vs. Non-amniote tetrapods	Hypothesis 2	2937	0		6.19777	0.009
Synapsida vs. Non-amniote tetrapods	Hypothesis 2	0	0		36.8868	0.003
Synapsida vs. Sauropsida	Hypothesis 2	725090	1.43996e-67		6.19328	0.003
Sauropsida vs. Non-amniote tetrapods	Hypothesis 3	10	0		5.63123	0.006
Synapsida vs. Non-amniote tetrapods	Hypothesis 3	0	0		35.3572	0.003
Synapsida vs. Sauropsida	Hypothesis 3	970310	5.96045e-290		2.67701	0.087
Sauropsida vs. Non-amniote tetrapods	Hypothesis 4	1535	0		9.74698	0.003
Synapsida vs. Non-amniote tetrapods	Hypothesis 4	0	0		36.5392	0.003
Synapsida vs. Sauropsida	Hypothesis 4	538133	0.00944129		6.32319	0.003
Herbivores vs. Non-herbivores	-	996190	0		54.9557	0.001

## Sheet: H Occlusal PCA EFA
Taxon	A1	A2	A3	A4	A5	A6	A7	A8	A9	A10	B1	B2	B3	B4	B5	B6	B7	B8	B9	B10	C1	C2	C3	C4	C5	C6	C7	C8	C9	C10	D1	D2	D3	D4	D5	D6	D7	D8	D9	D10
Acheloma_sp	-0.0431075	0.00624816	0.0174725	-0.00138318	-0.00992028	-0.000627652	0.00467001	-0.0020573	-0.000557334	0.00587331	1.60352	-0.0208272	-0.139549	0.0247573	0.0470295	-0.0182122	-0.0274394	0.0106731	0.0177007	-0.0032972	-0.193536	0.14969	0.0941362	-0.0380959	-0.0524839	-0.00153559	0.0258163	0.00852751	-0.0106846	-0.0048065	-0.0128432	-0.0334444	-0.00326069	0.0128391	0.0155209	-0.0110573	-0.0119495	-0.0022511	0.00181	0.00510053
Acroplous_vorax	-0.0222209	-0.0111658	0.00796824	0.0150798	0.00048844	-0.00846797	-0.00317864	0.00400799	0.00320796	-0.00252903	1.56797	0.000121932	-0.14461	-0.00292064	0.0494128	0.00232639	-0.021601	-0.00136855	0.0110797	0.000729644	-0.272878	0.206876	0.0701832	-0.0361775	-0.0270562	0.00938826	0.0163204	-0.00805149	-0.00984721	0.00207521	0.00027177	-0.0267293	-0.0281363	-0.0038319	0.0252781	0.0137656	-0.00126125	-0.0113246	-0.00517939	0.00642869
Aelurosaurus_felinus	-0.0220419	0.000408651	0.00647521	-0.00941064	-0.00698944	0.00561282	0.00433127	0.000164402	0.00363842	0.00429843	1.5713	-0.036114	-0.154727	0.0165415	0.0657336	0.00812343	-0.0241389	-0.00152226	0.00703452	-0.00427717	-0.229278	0.111611	0.111486	-0.00706947	-0.0479001	0.000991773	0.00945428	-0.0247997	-0.0124183	0.0093613	-0.00435067	0.00813613	0.0662646	0.00372657	0.0150087	-0.00832537	-0.0137146	0.00102634	0.000725459	-0.00656215
Alveusdectes_fenestratus	-0.0369697	0.00551131	0.0123607	-0.00390998	-0.00226823	0.002819	-0.000472845	-0.00382116	-0.00038004	0.00465846	1.57436	-0.0163262	-0.150759	0.0186487	0.0509379	-0.0103786	-0.0286049	0.00261506	0.0157909	-0.000443304	-0.263617	0.0440345	0.0826596	-0.00834962	-0.049111	-0.00944075	0.0209657	0.00605984	-0.00232827	0.00734428	-0.00163076	-0.0196573	0.0872108	0.0125645	-0.0200886	-0.00515438	-0.0108849	0.001491	0.00247324	-0.00606912
Aulacephalodon_kapoliwacela	-0.0225065	0.0392365	0.00446526	-0.0387924	-0.0177537	0.00909938	-0.002525	-0.016858	-0.00408459	0.00937933	1.55095	-0.0471805	-0.147241	0.015951	0.0404732	-0.00473366	-0.00451654	0.00541595	0.00687921	-0.000375612	-0.260323	0.0827759	0.0759601	0.00449794	-0.0445843	0.0314904	0.0333181	-0.0118773	-0.0117473	-0.000126053	-0.00414622	0.0207283	0.0622957	0.022777	0.0064099	-0.0118392	0.00643331	0.00959691	-0.0107894	-0.00117663
Belebey_vegrandis	-0.0592218	0.0236588	0.00670213	-0.00955836	-0.00159745	0.00142406	0.00482878	-0.0031469	-0.00391239	0.00404057	1.55942	0.0262994	-0.149897	-0.0211831	0.0521087	0.00952449	-0.024123	-0.00413838	0.00948263	0.00324689	-0.306651	0.0251393	0.05852	0.0237053	-0.0558268	-0.00767603	0.0300595	-0.00178861	-0.0112101	0.000666843	-0.01025	-0.0378535	-0.00608479	0.0104673	0.0108104	-0.0151143	0.011688	0.00242473	-0.0117937	0.00326472
Bolosaurus_major	-0.103503	0.0362386	0.0462618	-0.0209492	-0.0172237	0.0196348	0.0179345	-0.00958038	-0.00525617	0.00675877	1.55602	-0.0396984	-0.148249	0.0136735	0.0400846	-0.00373377	-0.012583	0.00435479	0.00661439	0.00407726	-0.273504	0.0981894	0.0479245	-0.0393614	-0.046277	0.00565814	0.0323929	0.00262639	-0.0130437	-0.00203458	-0.0233205	0.00545069	0.043581	0.0198715	-0.00783558	-0.0122201	-0.000815244	0.00572435	-0.00145	-0.00183241
Brachyprosopus_broomi	-0.0363364	0.0098482	0.00343361	-0.0136894	-0.00605316	0.0116224	0.0040749	-0.00745102	-0.003653	0.00540626	1.58483	-0.0093076	-0.15842	0.000211621	0.0456046	0.00403084	-0.0174185	-0.00566367	0.00707981	0.00307362	-0.226317	0.00410213	0.0740594	-0.00788765	-0.0519038	0.0156679	0.0186992	-0.0121784	-0.0183209	0.00407872	-0.00574164	0.0178491	-0.00347234	0.0173636	-0.00186462	-0.0255284	-0.00293974	0.0200674	-0.00360784	-0.00122408
Captorhinus_aguti	-0.10353	0.040084	0.0473326	-0.020643	-0.0278583	0.00490615	0.016798	-0.0015839	-0.00932716	0.00404506	1.57624	-0.00957367	-0.142601	0.00859241	0.042783	-0.00820986	-0.0234131	0.00206037	0.0100971	-0.00112994	-0.26971	0.127216	0.0655221	-0.0266992	-0.0398825	-0.0128376	0.00875697	0.0108495	0.00319476	-0.00549195	-0.0241375	-0.00393836	0.068152	0.0143236	0.00228501	0.00407694	-0.00751433	-0.0157255	0.00220548	0.0150429
Carrolla_craddocki	-0.0990826	0.036128	0.0390229	-0.00713347	-0.0234964	0.005808	0.0157512	-0.00818433	-0.00731251	0.00664844	1.57848	-0.00203785	-0.137069	0.00626118	0.0450483	-0.00447068	-0.0146142	0.00108788	0.00532707	0.000145153	-0.291381	0.0435515	0.116979	-0.0150335	-0.0473223	-0.00294532	0.03035	0.0139374	-0.00575035	-0.00261175	-0.0291203	-0.0223381	-0.0349028	0.0313097	0.0173127	-0.00715941	0.00137613	0.00400192	-0.00758606	0.00887128
Crassigyrinus_scoticus	-0.0569596	0.0178799	0.0222388	-0.0102912	-0.0167867	0.00292263	0.0132238	-0.000295511	-0.00728988	0.000928522	1.57864	-0.000743004	-0.147528	0.00555025	0.0485293	-0.00545348	-0.0228994	0.00288343	0.0120077	0.000250944	-0.267032	0.167794	0.0895419	-0.0252226	-0.0484046	0.000642137	0.028042	0.0101347	-0.0148094	-0.00189965	-0.0186925	-0.0180727	0.0253624	0.00580336	-0.000447355	-0.00883023	-0.0117555	0.00492616	0.0063916	0.00466482
Daptocephalus_leoniceps	0.00020848	0.0135484	-0.00815443	-0.038374	-0.00921443	0.00624669	-0.00758402	-0.00987835	0.00257748	0.00855704	1.56726	-0.0408142	-0.156257	0.0178646	0.0499634	-0.0060625	-0.0101454	0.00872642	0.0139846	0.00269111	-0.271749	0.000486948	0.0910004	0.021836	-0.0420982	0.0253977	0.0274175	-0.0206635	-0.00639682	0.0023001	-0.000649798	-0.0226502	0.0270181	0.0496164	-0.0101285	-0.00101794	0.000255163	-0.00244293	-0.00872707	-0.0123569
Delorhynchus_cifelli	-0.069426	0.0211091	0.0153561	-0.00676127	-0.0057498	0.00514216	-0.000437615	-0.00168648	-0.00249233	0.00330982	1.53184	0.0202654	-0.147982	-0.007681	0.0431764	0.0117448	-0.0201578	-0.00625597	0.00776722	0.00583323	-0.369152	0.0887118	0.08799	-0.0314863	-0.0321355	-0.005854	0.0228062	-0.00288205	-0.00644013	-0.00112854	-0.0117555	-0.0701595	0.0440349	-0.0134999	-5.12221e-05	0.00412444	0.0104579	-0.00361477	-0.00901805	-0.00453783
Delphaciognathus_paucidens	-0.290843	0.0170932	0.0675726	-0.0178918	-0.0482716	0.00648003	0.0345826	-0.00413599	-0.0121565	0.00568758	1.55442	-0.0149853	-0.129828	0.00696322	0.0402765	-8.88739e-05	-0.00303361	-2.32264e-05	-0.00688032	0.00337096	-0.145959	0.101848	0.0539232	0.00302889	-0.0204237	0.0034516	0.0277409	-0.0102604	-0.0202292	0.000224402	-0.0259779	0.0431866	0.112416	0.00292904	-0.0497319	-0.016463	0.00718402	-0.000546145	-0.0108082	0.00881701
Dendrerpeton_helogenes	-0.0471104	0.00292358	0.0261799	-0.000424574	-0.0170268	-0.0017711	0.0149391	0.00108721	-0.0107139	-0.00176084	1.58861	-0.0131809	-0.135524	0.0135534	0.0438674	-0.00410386	-0.0230552	0.000662591	0.0137691	0.00313661	-0.238954	0.174309	0.10137	-0.0571168	-0.041885	0.0100532	0.0242884	0.00269547	-0.0100218	-0.00485145	-0.0134685	0.00688753	-0.0116833	-0.000462964	0.00761621	0.000798527	-0.000995611	0.00292181	0.000812626	-0.00189011
Desmatodon_hesperis	-0.0524362	0.0236163	0.0280872	-0.0206468	-0.0177766	0.00276033	0.00644021	-0.00221418	-0.000907596	0.00532681	1.51599	-0.0146408	-0.127808	0.0191372	0.0428939	-0.0101832	-0.0281707	0.00197229	0.0166848	-0.000987264	-0.366195	0.1215	0.0921591	-0.0132342	-0.0341465	0.00193218	0.0101656	0.0146984	-0.00340813	-0.00878197	-0.0137844	0.00764745	0.073134	0.0350805	-0.0213855	-0.00252877	-0.0110498	-0.00416177	4.57258e-06	0.0154067
Diadectes_absitus	-0.0358375	0.015312	0.0235444	-0.0111937	-0.0156843	0.000464393	0.00843618	-0.00145229	-0.00145431	0.00182231	1.56456	-0.00292567	-0.154	0.013115	0.0484338	-0.0112352	-0.0242749	0.00493723	0.0116211	-0.00182665	-0.291245	0.0575213	0.0781442	0.0055612	-0.0533255	-0.00130433	0.0312209	0.0158235	-0.00462821	-0.00210007	-0.00780181	-0.0197183	0.0376937	0.0122665	0.0012995	-0.00529025	-0.00236427	-0.00764928	-0.00370097	0.00951713
Diadectes_lentus	-0.0656533	0.0327326	0.0258248	-0.00476957	-0.00748435	-0.00268631	0.00222562	0.00115538	0.00130489	0.00601165	1.52155	-0.0290785	-0.137741	0.0204098	0.0486364	-0.0107554	-0.028057	0.00539162	0.0102795	-0.00327976	-0.346774	0.0405881	0.0917134	-0.0552545	-0.0602199	-0.0120474	0.0127591	0.0212173	-0.00969038	0.0047567	-0.00745744	0.00161464	0.109206	0.0116806	0.0105337	0.00775187	-0.00937229	-0.00558533	-0.00651343	-0.00781377
Dicynodon_lacerticeps	-0.0825968	0.0297042	0.03564	-0.0186927	-0.00882194	0.0262358	0.00889642	-0.0112074	-0.0021944	0.0117118	1.51942	-0.0151772	-0.14383	-0.00455621	0.0338425	-0.00405691	-0.012457	0.00119185	0.00350144	0.00329764	-0.365616	0.040291	0.0719362	0.00976748	-0.049171	0.0157994	0.0305548	0.00678059	0.00169819	0.0040408	-0.0203527	-0.0200878	0.0126353	0.0434937	-0.0685492	-0.0201282	0.00334374	-0.00157128	0.00738506	0.00529599
Dicynodontoides_sp	-0.0376504	0.0120219	-0.0060237	-0.0140542	-0.00069504	0.00545565	0.00706572	-0.00155987	-0.00169151	0.00603178	1.57591	0.00812584	-0.165229	-0.00538399	0.0631988	0.00699319	-0.0244134	0.00108766	0.0110372	0.00150331	-0.245339	0.0463471	0.0440874	0.0216782	-0.0308628	-7.09181e-05	0.035839	-0.010604	-0.0168081	-0.000778195	-0.0101351	0.0185849	-0.028533	0.0230842	-0.0206341	-0.0267965	-0.022893	0.0241255	-0.00588937	0.00151231
Diictodon_feliceps	-0.144019	0.059903	0.0558375	-0.0258217	-0.0168002	0.0378884	0.0239225	-0.0148396	-0.0100653	0.00970408	1.54562	-0.0484007	-0.130368	0.0196963	0.0269529	-0.0129929	-0.00010371	0.00697075	0.000538648	0.00438356	-0.313959	0.0647647	0.0769297	0.00768514	-0.0192538	0.0347014	0.0309949	-0.0153335	-0.00827908	0.00751019	-0.0354105	0.0210014	0.0120207	-0.020547	-0.0488227	-0.00178887	0.0204989	0.0259701	0.00614207	0.00983235
Diplocaulus_magnicornis	-0.00567715	-0.00732073	-0.00539335	0.00970418	0.00259149	-0.000320586	-0.00436258	-0.00442021	0.00250556	0.00254746	1.5056	0.0164477	-0.143588	-0.0015568	0.0417735	-0.00289385	-0.0185571	-0.000608037	0.0123415	0.0010093	-0.410556	0.139999	0.0914784	-0.00588442	-0.0525208	-0.00321622	0.0139845	0.00831458	0.00304605	-0.0107644	0.00507405	-0.0333149	-0.0263505	0.00172491	0.0146016	-0.000842606	0.00985267	-0.00468728	-0.00490673	5.257e-05
Doragnathus_woodi	0.358024	-0.0293401	-0.0839981	0.018864	0.0408401	-0.00370828	-0.0222301	-0.000793835	0.010945	0.00132253	1.53936	0.00558201	-0.101181	-0.0182318	0.013564	0.00969409	0.00422643	-0.00454043	-0.00721049	0.00120055	-0.177196	0.210779	0.0124367	-0.0373741	0.010209	0.00726091	-0.012435	-0.00209524	0.0115545	0.000401679	0.047543	-0.13437	-0.0914702	0.0535906	0.0421089	-0.0181055	-0.0163022	0.00637773	0.00755242	-0.00335736
Edaphosaurus_boanerges	-0.0593732	0.0232307	0.0288416	-0.00851316	-0.010217	0.00426675	0.00727458	-0.00888531	-0.00606543	0.00611082	1.53949	-0.0113323	-0.155099	0.012854	0.0544276	-0.00494202	-0.0199301	0.00546921	0.0110215	-0.00389925	-0.278406	0.0288482	0.00233157	-0.0279767	-0.058487	0.00321873	0.0363136	0.00397221	-0.0102736	0.00213822	-0.00660544	-0.0465189	0.0829649	0.0026412	-0.0129215	-0.00789869	-0.00254567	0.00361785	-0.0037339	0.0015148
Edaphosaurus_cruciger	-0.0454464	0.00805596	0.00917586	-0.00977064	0.00569879	0.0185153	0.00506297	-0.0090227	-0.00352385	0.00329943	1.52784	-0.0517548	-0.15375	0.0292157	0.0546773	-0.0109481	-0.0220295	0.00379805	0.00761907	-0.00347343	-0.288547	0.057183	0.0473759	-0.0206676	-0.0602057	-0.00204833	0.00895439	-0.00773358	-0.0126905	0.00645784	-0.0119486	-0.0342744	0.0468442	0.0123474	-0.0191149	-0.00392217	0.00928555	0.0164095	0.00597704	-0.0105285
Endothiodon_tolani	-0.0240239	0.0304324	-0.0120324	-0.0213146	-0.00180867	0.0129897	0.00795847	-0.0144489	-0.00077094	0.00623845	1.50285	0.0302052	-0.149962	0.00156963	0.0457792	-0.00888412	-0.0163353	0.00184973	0.00701808	-0.00234195	-0.367659	0.0802124	0.0298432	0.0374767	-0.0363841	0.00381286	0.0207846	0.00578224	-0.00909368	-0.00626417	0.00399136	-0.0198377	0.089138	0.0153614	0.00458372	-0.0333068	-0.00209734	-7.7249e-05	0.0061989	0.00183746
Eoherpeton_watsoni	-0.040515	0.0221328	0.0182076	-0.0147288	-0.013122	0.00923011	0.00842022	-0.00171835	-0.00178204	0.00186482	1.56903	-0.0318839	-0.140996	0.0239551	0.0458843	-0.00708366	-0.0212541	-0.00208116	0.00929038	0.00441352	-0.209811	0.169399	0.121516	-0.0461675	-0.0803757	-0.00291113	0.0156653	-0.00694867	-0.0059416	0.00590164	-0.00990641	0.0264721	0.0105653	0.0182706	-0.0215695	-0.0185176	-0.00492792	0.00484493	-0.00528779	-8.50791e-05
Eryops_megacephalus	0.237266	-0.0104681	-0.0533837	0.0106472	0.0306883	-0.00946481	-0.0205792	0.00821348	0.0156792	-0.00484729	1.55774	-0.0153316	-0.126259	0.00581596	0.032467	-0.00325451	-0.0104772	-0.000324532	0.000652205	0.000176742	-0.197684	0.194387	0.056509	-0.0358084	-0.0168924	0.00468572	-0.00211209	-0.000423337	0.00956044	0.00775427	0.0273818	-0.121301	-0.070118	0.0384246	0.0365259	-0.0108339	-0.0298475	-0.00662149	0.0156322	0.00535936
Estemmenosuchus_mirabilis	-0.0638198	0.0361649	0.0334975	-0.0190117	-0.0176545	0.0130873	0.00100086	-0.0067055	0.00526612	0.00398658	1.52897	-0.00963044	-0.113438	0.00757637	0.0311913	0.00231607	-0.0161571	-0.0100245	0.00555321	0.0108363	-0.276704	0.0869218	0.163128	-0.0425539	-0.0783541	0.00161543	0.0125784	0.000857544	0.00963006	-0.00875615	-0.0163942	-0.0355427	0.0856688	0.0161707	-0.000807432	0.000554314	-0.0105148	-0.0023453	0.00427958	-0.0031926
Euptychognathus_bathyrhynchus	-0.0689885	0.0324005	0.0255771	-0.0159724	-0.00707107	0.00831618	0.00432292	-0.00187809	-0.000405925	0.00325618	1.5117	-0.00600696	-0.14504	-0.00236886	0.0518839	0.00409838	-0.0231277	-0.00434643	0.0149369	0.00719683	-0.298878	0.0185442	0.0326196	0.011868	-0.0314722	0.0183645	0.0136273	0.00628874	0.00456953	-0.00271147	-0.00835158	-0.0531947	0.0728555	0.0498135	-0.0440124	-0.00621596	0.000196137	-0.00947092	0.000331091	0.00535812
Euryodus_dalyae	-0.0648813	0.0220751	0.0185496	-0.0184568	-0.00314739	0.00932831	-0.00131913	-0.0056498	0.00196475	0.00355801	1.56289	-0.0055688	-0.13883	0.00468127	0.0384638	-0.000337259	-0.0180484	-0.00125894	0.0114888	0.0017013	-0.304954	0.0841803	0.0898762	-0.0263848	-0.0494041	0.00719955	0.0136376	0.00216539	-0.00447042	-0.00614093	-0.0120375	-0.048687	0.0388851	0.0121286	-0.00585483	0.00735429	0.00248507	-0.0142342	-0.00307636	0.00708425
Feeserpeton_oklahomensis	-0.0470312	0.0161365	0.0167308	-0.00664769	-0.00684217	0.00302498	0.00288584	-0.00198018	-0.00118642	0.00345369	1.56639	-0.00388929	-0.144392	0.00630815	0.0423295	-0.00565073	-0.019577	0.00308487	0.0105901	-0.00123385	-0.288054	0.110785	0.0781803	-0.0357685	-0.0484456	0.00833129	0.030288	0.00346957	-0.0169651	-0.00611548	-0.0114897	-0.0448152	0.0299643	0.0129533	0.00369379	0.00374086	-0.00320921	-0.00199153	0.00299207	0.00149073
Galeops_whaitsi	-0.0317443	0.000802752	-0.00140122	-0.00136821	0.00778579	0.00846392	-0.00500152	-0.00978421	-0.000989803	0.00653038	1.60868	-0.0156126	-0.149441	0.0175375	0.04703	-0.013068	-0.0259624	0.00428176	0.0155569	0.00209737	-0.156543	0.0536818	0.0768534	0.00390885	-0.0432936	-0.00576918	0.035887	-0.00185123	-0.0147752	0.00497998	-0.00925079	0.00196335	-0.047988	-0.0035472	0.0286861	-0.00683378	0.00167299	0.0166063	0.00166814	-0.00915751
Gansurhinus_naobaogouensis	-0.0753043	0.0075577	0.0117019	-0.0135272	-0.00308247	0.0140448	0.00943877	-0.00193522	-0.00272453	0.00409371	1.53663	-0.061731	-0.163409	0.0142728	0.0434737	-0.0153549	-0.0271261	0.000969333	0.00828102	-0.00524755	-0.342847	-0.0111232	0.0240358	-0.0565946	-0.0361392	0.027596	0.0218169	-0.0106709	-0.0191219	-0.002325	-0.00676274	-0.00143028	0.100422	0.0382098	0.00352941	0.00667442	0.00713582	0.00740556	0.0105456	0.00527567
Greererpeton_burkemorani	-0.021634	-0.0106596	0.00649995	0.00845335	-0.00190244	-0.00183805	-0.000330792	-0.00277318	0.000202237	0.00415494	1.58373	-0.0081971	-0.14233	0.00674325	0.0435684	-0.00311422	-0.0244929	0.000356229	0.0155322	0.000615773	-0.274815	0.0865668	0.087276	-0.0379239	-0.040942	-0.00493672	0.018393	0.0145686	-0.00519894	-0.00717666	-0.00651606	-0.0321203	-0.00611108	0.0121365	0.0127297	0.00565906	0.00241976	-0.0099999	-0.00909048	0.00619688
Huskerpeton_englehorni	-0.0716943	0.0383742	0.0292243	-0.0154484	-0.0236926	0.0107594	0.0191021	-0.00661169	-0.0125478	0.00360294	1.57098	-0.00935494	-0.12994	0.0112006	0.039486	-0.00866921	-0.017278	0.00286071	0.006723	0.000355511	-0.254078	0.202117	0.0861213	-0.0584399	-0.052869	0.00171095	0.0299172	-0.00522049	-0.00613138	0.000395328	-0.0205734	-0.00743566	0.0274436	-0.000253142	0.00221552	-0.0166535	0.00218987	0.00468593	-0.00264714	0.00428326
Jonkeria_truculenta	0.00578499	-0.023347	-0.0125889	-0.000576793	0.00103875	0.00506778	0.0117273	-0.000558515	-0.00930214	-0.00125391	1.57286	-0.0315421	-0.134234	0.0319555	0.0472132	-0.00894571	-0.0226088	-0.0061313	0.00446654	0.00249554	-0.244519	0.0960202	0.159683	-0.0230811	-0.0667832	-0.0145339	0.0127593	-0.008205	0.00837898	0.00554692	-0.00245411	0.0387648	-0.046874	-0.00548606	0.00596763	-0.0287396	-0.01196	0.0103332	0.0102229	0.00340854
Kembawacela_kitchingi	-0.0297129	0.0162618	0.0183352	-0.0377301	-0.014198	0.0102025	0.00248938	0.00668022	0.000434013	-0.00080943	1.45346	0.0023242	-0.12925	0.00600993	0.0325972	-0.00483238	-0.00789828	-0.00438267	0.011902	0.00948084	-0.449933	0.115138	0.0629668	0.0164386	-0.0616603	0.0206971	0.0246527	-0.00199832	-0.0188386	-0.00995877	-0.0102579	-0.00721685	0.0524742	0.0377329	-0.043519	0.00605739	-0.0127426	-0.00600979	0.00450422	0.00819045
Labidosaurus_hamatus	-0.115338	0.0429948	0.0508491	-0.0179053	-0.0295816	0.00244491	0.0148281	-0.00341079	-0.00703867	0.00756746	1.58929	-0.0104579	-0.136866	0.0175851	0.048584	-0.0116594	-0.0246902	0.00210485	0.00817432	-0.00246301	-0.26337	0.127383	0.0608439	-0.00876387	-0.0345287	-0.0210681	0.000351699	0.0118578	0.0116645	0.00804676	-0.0219657	-0.00895225	0.066084	0.0027108	-0.011776	0.0055492	-0.0010178	-0.0171102	-0.00820967	0.0138396
Laosuchus_hun	-0.0600591	0.0140155	0.0220098	-0.00615273	-0.0128015	0.00226502	0.0082209	-0.00128423	-0.00496945	0.000553141	1.62504	-0.00329742	-0.164777	0.00585673	0.0525256	-0.00471604	-0.0236846	0.00481949	0.013649	-0.00306463	-0.141831	0.0392303	0.0624355	-0.0193047	-0.0377946	0.0175306	0.0246682	-0.00926151	-0.0140377	0.00100882	-0.00526513	-0.0324163	0.0331826	0.0130959	-0.00955781	-0.00692987	0.0029914	-0.00265752	-0.000404827	0.00335682
Lycideops_longiceps	-0.0272953	0.0119103	0.00161496	-0.00433517	0.00117082	-0.00197338	-0.000922519	0.00253612	-0.0003685	-0.00172544	1.60852	0.00626683	-0.167483	-0.0069075	0.0597872	0.00442336	-0.0302443	-0.00215239	0.0176245	0.000479526	-0.14506	-0.039804	0.0469509	-0.0294821	-0.0162514	0.00562863	0.0106516	0.00549563	-0.0165539	-0.00698723	-0.00159824	-0.0198771	-0.00289606	-0.0135476	-0.00686993	0.0144167	0.00490338	-0.00604259	0.00632491	-0.00128555
Lycosuchus_vanderrieti	-0.0971881	0.0269553	0.0408279	-0.00926545	-0.014877	0.0135604	0.0115403	-0.00777428	-0.00537208	0.00786522	1.59392	-0.0205894	-0.158972	0.00652166	0.0461735	-0.00124115	-0.0153927	-0.000493415	0.00858298	0.00310367	-0.202602	0.064402	0.0784598	0.00570828	-0.0669247	-0.00206912	0.0156752	-0.00757345	-0.0149327	0.00202207	-0.0148763	-0.0032281	0.067226	0.0332233	-0.0163768	-0.00709645	0.00990214	-0.00301583	-0.000620516	-0.0044641
Megalocephalus_pachycephalus	-0.0391335	0.00483084	0.0158462	-0.00340722	-0.00703427	0.00453614	0.00741267	-0.00356254	-0.00622575	0.00179714	1.60278	-0.00585218	-0.163264	0.00233329	0.0516242	-0.00275443	-0.0225659	0.00165866	0.011074	-0.000837652	-0.222511	0.0490127	0.109337	-0.0150107	-0.045287	0.00716519	0.022712	0.00164511	-0.00971704	-0.00277138	-0.0112878	-0.0453454	-0.0181438	-0.0012874	-0.00169566	0.00413809	0.000704031	-0.000680548	0.00521207	-0.00317632
Moradisaurus_grandis	-0.00904534	-0.00429492	-0.0103468	-0.00489571	0.00681497	0.00220019	-0.00142226	0.00355209	0.0039767	-0.000185203	1.48991	-0.0541507	-0.154747	0.0164223	0.0420494	-0.0189073	-0.0254019	0.00364313	0.00673736	-0.00902805	-0.407116	-0.0115642	0.0230445	-0.036447	-0.0396545	0.016489	0.0314555	-0.000833125	-0.0151424	-0.00126279	0.00868095	-0.0245589	0.0911273	0.0455709	0.0148622	0.0162018	-0.007442	0.00789275	0.0213916	0.00903036
Moschops_capensis	-0.546411	0.0487858	0.107854	-0.0539766	-0.0413673	0.0105885	0.00780836	0.0124379	0.00693556	-0.00790736	1.46274	-0.0349933	-0.0502353	0.0005378	-0.00762883	0.0243522	0.0169879	-0.00844519	-0.00177314	-0.0019946	-0.232713	0.169836	0.0985931	-0.0207393	-0.00491371	0.0070618	0.000621941	-0.012393	-0.00333098	0.00148402	-0.104295	0.121551	0.146001	-0.00390087	-0.0746627	-0.0159739	0.00559732	-0.00912055	-0.00592957	-0.00313629
Niassodon_mfumukasi	-0.0266083	0.0463737	-0.0324004	0.00379432	-0.0347758	0.0276627	-0.001146	0.00478152	-0.00718408	0.00157408	1.50927	0.109247	-0.182634	-0.00674717	0.0543569	-0.00092431	-0.00835214	-0.0148415	0.0212593	-0.0041086	-0.340506	0.0802179	0.0670264	0.0569592	-0.0474736	0.00783996	0.0190322	0.010941	-0.0146771	-0.00607245	-0.0172859	0.0398234	0.00439435	0.0606187	-0.0228453	-0.0130397	-0.0308077	0.00457551	0.00363729	-0.000650349
Nochelesaurus_alexanderi	-0.0243662	0.0046487	0.00507924	0.0109639	0.00228272	0.00573916	-0.0115196	-0.0109229	0.00972487	0.0117853	1.52281	0.0170594	-0.117078	0.00172895	0.0398807	0.000373565	-0.0157971	-0.00725941	0.0091745	0.00683996	-0.335186	0.242407	0.0914448	-0.0135332	-0.0651324	-0.00587022	0.0201578	-0.000345031	-2.00112e-05	-0.00289278	-0.00120422	-0.014675	-0.0189376	0.0157181	0.0213208	-0.00809235	0.018288	-0.0063663	-0.0133398	-0.00226971
Odontocyclops_whaitsi	-0.045806	0.0231653	0.0104352	-0.0223855	-0.00908931	0.0116887	0.00875554	-0.00375971	-0.00462027	0.00393362	1.59216	-0.00563552	-0.148454	0.00498484	0.0482096	-0.00125792	-0.0225116	0.00114459	0.0116255	0.000424889	-0.216966	-0.00934053	0.093874	-0.0103998	-0.0606841	0.0205135	0.0233214	-0.0108256	-0.00608669	-0.00339644	-0.00577086	-0.00019509	0.0199468	0.0404332	-0.019912	-0.0288161	-0.000270252	0.0110364	0.00451312	0.00641236
Orobates_pabsti	-0.00410009	0.00405067	-0.00496318	-0.00513758	0.000543689	0.00374424	0.00469393	-0.00218105	-0.00449949	0.000374633	1.53228	-0.0127271	-0.133881	0.0220516	0.0426465	-0.0164255	-0.0227208	0.00589369	0.00967282	-0.00167626	-0.329694	0.107703	0.097732	-0.00897189	-0.0607384	-0.0140614	0.0126962	0.00373564	0.00698491	0.00788966	0.00405365	0.00756522	0.0404811	-0.0160186	0.000585099	-0.00582367	-0.00191312	0.01248	0.0114165	0.0019347
Oudenodon_bainii	-0.0467767	0.0176755	0.00412574	-0.0225555	-0.0117284	0.0146653	0.00792302	-0.00798009	-0.00217153	0.00602503	1.55446	-0.0127738	-0.147621	0.00970398	0.0447723	-0.00467604	-0.0141656	0.00439158	0.0101812	-0.000714785	-0.270854	-0.00849872	0.0794055	0.00482279	-0.0459795	0.0252623	0.0315792	-0.0122504	-0.0121572	-0.00368895	-0.00765293	0.00349495	0.0478605	0.0306523	-0.0166023	-0.0248582	0.0006337	0.00371155	-0.00175231	-0.00462436
Pantylus_cordatus	-0.0302067	0.0054478	0.00321693	-0.0102639	9.34607e-05	0.00909914	-0.00037998	-0.00883952	0.00115021	0.00705357	1.47028	-0.0106536	-0.145489	0.00898731	0.0432224	-0.00452761	-0.0161183	0.00380795	0.00794389	-0.00283311	-0.398073	-0.025978	0.0808533	0.0059596	-0.0373663	-0.00129879	0.0159216	0.00690991	-0.00466011	0.00402012	-0.0149528	-0.0651689	0.00884016	0.0140531	-0.00611946	-0.011757	0.000691525	-0.00203417	-0.00398442	-0.00225104
Parrsboro_jaw	0.0845124	-0.0189122	-0.0193457	0.0178546	0.0142113	-0.0102794	-0.0149422	0.00207218	0.00870138	0.000328927	1.58938	-0.0152415	-0.129474	0.0174159	0.040821	-0.0147031	-0.020992	0.0106406	0.0134468	-0.0085223	-0.186945	0.231163	0.0653786	-0.0601173	-0.0452572	0.00348995	0.0148673	-2.15319e-05	-0.00934699	-0.00435384	0.00648152	-0.0651662	-0.0601362	0.0281998	0.0388763	0.000505561	-0.0195333	-0.00595034	0.00808308	0.00207359
Perplexisaurus_foveatus	-0.00706805	-0.00669162	0.00186433	0.00505702	-0.000463009	-0.0039177	0.00161638	0.00372665	-0.00130734	-0.00319955	1.60776	-0.00093666	-0.172848	0.000663223	0.0599666	0.000148515	-0.0282825	3.59178e-05	0.0156193	-0.000199346	-0.143438	-0.0139244	0.0368718	-0.00386501	-0.0263044	-0.00693589	0.0175512	0.00595258	-0.00962486	-0.000780233	-0.00101583	0.031385	-0.00468437	-0.0197535	-4.96571e-05	0.0129725	-0.00251471	-0.0049322	0.00408068	-0.00226341
Platyrhinops_lyelli	0.205898	-0.0384858	-0.049985	0.0295741	0.0291062	-0.0122517	-0.0198439	0.00621047	0.0151705	-0.00298131	1.55955	-0.00258698	-0.117308	-0.00959135	0.0234	0.00365505	-0.00453502	-0.000346544	-0.00144389	-0.00131582	-0.216159	0.231604	0.0481465	-0.0551512	-0.0127996	0.0183422	0.0107487	-0.00504973	-0.0051624	0.000896262	0.0358983	-0.11079	-0.0932115	0.036069	0.0395544	-0.0158134	-0.0201587	0.000682333	0.0144213	0.000605545
Procuhy_nazariensis	0.148329	-0.00400173	-0.0272248	0.0110206	0.0245168	-0.00226758	-0.0152315	-0.000461142	0.0105866	-0.00121711	1.53796	-0.0206839	-0.127865	0.00796173	0.0434889	-0.00354656	-0.0142928	0.00499935	0.00993106	-0.00369674	-0.300957	0.239841	0.084706	-0.0107424	-0.0132454	0.0178734	0.00188971	-0.00997958	-0.00350452	0.00381568	0.0219636	-0.0951603	-0.0699132	0.01263	0.0323612	0.00909774	-0.00327766	-0.00546852	-0.00173357	-0.00328648
Procynosuchus_delaharpeae	-0.0466525	0.0129723	0.0241688	-0.00571217	-0.0120758	0.00711593	0.00915585	-0.00677869	-0.00797007	0.00377489	1.61768	-0.0144476	-0.163899	0.00687913	0.0526637	-0.00400305	-0.0217645	0.00406796	0.0112333	-0.003461	-0.143145	-0.0169794	0.0550748	-0.00117542	-0.0536776	-0.000610728	0.0362035	0.00380054	-0.0185602	-0.00238273	-0.0054052	-0.00245752	0.0299487	0.0109841	-1.09333e-05	-0.00815716	-0.00466084	0.00650891	0.00115691	-0.000931537
Purlovia_maxima	-0.0496588	0.0254673	0.00788472	-0.0180514	-0.00536618	0.0190892	0.00870243	-0.00986725	-0.00898349	0.00553253	1.60383	-0.0114803	-0.136544	0.0174274	0.0404317	-0.0129359	-0.0230872	0.00752607	0.0116212	-0.000873752	-0.200634	-0.0324641	0.115856	-0.00682169	-0.0710172	0.0118018	0.0266502	0.000275949	-0.00249226	-0.00303423	-0.00343229	-0.0239141	0.0393382	0.0254688	-0.0125612	-0.0131651	0.0177402	0.0101055	0.0158282	-0.000426773
Rastosuchus_hammeri	-0.0441172	0.0184696	0.0217562	-0.00586695	-0.0160429	0.000360502	0.00991689	0.000321079	-0.00421068	0.00126332	1.60934	-0.00730122	-0.162418	0.00939249	0.0561096	-0.0077143	-0.0291521	0.00202935	0.0155695	0.00156975	-0.151482	0.0839083	0.0647272	-0.0234864	-0.0391818	0.00914444	0.0190223	-0.00156242	-0.00512052	0.0015521	-0.00792689	-0.0248401	-0.0172272	0.0134008	0.000767601	-0.00773809	-0.00594887	-0.00261715	0.00524162	0.00733041
Reiszia_gubini	-0.0509132	0.0201268	0.00897791	-0.015445	-0.00244944	0.0147851	0.00558514	-0.00792192	-0.00593159	0.00426146	1.6097	-0.00705889	-0.159395	0.00465668	0.0519211	-0.00153059	-0.0253836	0.0010327	0.0141347	-0.00057885	-0.107719	-0.00136647	0.0356165	-0.000970675	-0.022089	0.0134136	0.0111037	0.001622	-0.0190274	-0.00239219	-0.0015401	-0.0108752	0.0283937	0.015374	-0.0054645	-0.00753273	-0.00581444	0.00393368	0.00215762	-0.0167733
Rhachiocephalus_magnus	-0.0523186	0.0268998	0.00675884	-0.0234571	-0.00940034	0.0118384	0.00848561	-0.002454	0.00403589	0.00125672	1.58608	-0.0198545	-0.136656	0.0214584	0.0489784	-0.00722119	-0.0238107	-0.00176764	0.0104387	0.00449404	-0.236114	-0.0136976	0.115625	-0.00880562	-0.0651135	0.0155023	0.00800651	-0.00964524	-0.00689988	0.00834786	-0.0054218	-0.0342918	0.0424764	0.0214438	-0.0350255	-0.0143323	0.00190229	-0.002341	0.0119301	0.0128869
Sauroctonus_progressus	-0.0352091	0.00914581	0.0127126	-0.00732369	-0.00514806	-0.00105141	0.00439787	-0.00365424	-0.00250611	-0.000376363	1.59629	-0.000255517	-0.174665	0.000306595	0.0560051	0.000211118	-0.0297526	-0.00053364	0.0154185	0.000267641	-0.188829	0.0445049	0.0705133	0.00711365	-0.0310526	0.00963877	0.00778383	0.00677007	-0.0108669	0.00282767	0.000761232	-0.0497178	0.0517756	0.0193305	-0.00736478	0.00476965	0.0101494	-0.00697545	0.00217925	0.00055855
Scylacosaurus_sclateri	-0.00717284	-0.00434763	0.00121472	0.00388273	-0.000205882	-0.00154987	-0.000230823	-1.72574e-05	-0.000277143	0.000141901	1.6101	0.000446525	-0.175202	0.00299922	0.0612507	-0.000852445	-0.0306422	0.0012215	0.0180592	-0.000502079	-0.150603	0.0181966	0.0604449	0.00487274	-0.0302931	-0.0077448	0.00559206	-0.00102333	-0.000126812	-0.00190354	-0.00151928	0.0145098	-0.0115594	-0.00191078	0.00392718	-0.00316492	0.00345785	0.00410649	-0.0022982	-0.0073745
Shihtienfenia_permica	-0.0600668	0.0156153	0.0206414	-0.000850002	-0.0109777	-0.00236623	0.00461171	6.54555e-05	-0.000712364	0.00108834	1.61494	-0.00457796	-0.146787	0.00945744	0.0435822	-0.00939554	-0.0212207	0.00749411	0.0112698	-0.00325158	-0.189274	0.0584665	0.0901466	-0.0509154	-0.0712607	0.0149926	0.0283896	0.00760351	-0.0104198	-0.0103821	-0.00809261	-0.0137731	-0.0265191	0.0305068	-0.0146244	-0.00966675	0.00269172	-0.0124474	-0.00267519	0.0117831
Sphenacodon_ferox	-0.0353174	0.0076611	0.00703478	-0.00491841	-0.00307338	0.00699191	0.00124052	-0.00494163	-0.00130556	0.00359616	1.60224	-0.00224139	-0.164814	0.00494307	0.054462	-0.00408609	-0.025273	0.000853694	0.0157326	0.000229985	-0.181788	0.0412448	0.0671353	-0.0242959	-0.0378583	0.000541674	0.0244606	0.00332656	-0.0117788	0.00245279	0.00101659	-0.0260563	0.0537284	0.0170402	-0.0413608	-0.00128921	7.09062e-05	0.00543137	-0.00784746	-0.00379807
Sumidadectes_chozaensis	-0.0633119	0.0214947	0.0195398	-0.0127227	-0.00851494	0.00143484	0.00690812	0.00378185	-0.00567728	0.00125576	1.55177	-0.00689306	-0.152339	0.00445143	0.0457459	-0.00397255	-0.0216882	0.00707779	0.0138106	-0.00475684	-0.319401	0.0322765	0.0432359	-0.0333976	-0.053264	-0.0300808	0.0184441	0.0208858	-0.00917218	-0.00675417	-0.010257	-0.0718175	0.0697152	0.00873194	-0.00743475	0.0117742	-0.00890852	-0.0105325	0.00260309	0.00463868
Suminia_getmanovi	-0.039343	0.00706899	0.00629942	-0.0019786	-0.00358681	-0.000467818	0.00518341	-0.000727609	-0.00603054	0.000600978	1.59428	0.000124786	-0.158784	-0.00325668	0.0545459	-0.000794349	-0.0257049	0.000640786	0.012644	0.00250692	-0.21586	0.115125	0.0597814	-0.0238472	-0.0356864	-0.00243028	0.0293139	-0.00589807	-0.014807	0.000696085	-0.00482656	0.0232507	0.0287281	-0.0147469	0.00112115	0.00284864	0.000555155	0.00935033	-0.00186546	-0.00856195
Syodon_efremovi	-0.0593441	0.0221468	0.0211244	-0.0178936	-0.0133744	0.0129596	0.0102434	-0.00812316	-0.0067289	0.005376	1.60627	-0.00443278	-0.149444	0.0080022	0.0401066	-0.0049348	-0.0169822	0.00143107	0.00674414	0.00112468	-0.210562	0.0134185	0.0774033	-0.0131747	-0.0545517	-0.00743024	0.0320018	0.00733612	-0.0134778	0.000321439	-0.0113635	-0.003891	0.0143111	0.00646165	0.00458497	-0.0139508	-0.00309235	0.00875773	0.00476761	-0.00160274
Tapinocaninus_pamelae	-0.0154799	0.00651903	-0.00582899	-0.0171025	0.00150201	0.0186458	0.00555779	-0.010675	-0.00437066	0.00270305	1.58689	-0.0270744	-0.13396	0.0276554	0.0469609	-0.00925243	-0.0231313	-0.00156022	0.00798376	0.00069795	-0.193016	0.150808	0.120564	-0.0409414	-0.0481797	-0.00614162	0.0124992	-0.0168485	-0.00574075	0.0111698	-0.00717387	0.0238681	-0.0034507	0.0140475	-0.0156776	-0.0245689	0.00691911	0.0152266	-0.00195809	-0.00200257
Tramuntanasaurus_tiai	-0.0757256	0.0157606	0.0279442	-0.0134239	-0.0138105	0.0108399	0.0145658	0.00348198	-0.00100852	0.00152663	1.54903	-0.0569634	-0.15453	0.0134031	0.0426205	-0.0146337	-0.0239716	0.00638958	0.0146566	-0.00263576	-0.290682	0.0817643	0.00660504	-0.0826636	-0.0508494	0.0180806	0.0228133	-0.0153925	-0.0217254	-0.00707708	-0.0117362	0.0249293	0.0650306	0.0285672	0.00687122	0.0190248	0.0196153	-0.0019408	-0.00211423	0.00310101
Trimerorhachis_insignis	-0.00302031	-0.00423872	0.00102679	0.00353047	0.00394953	0.000168861	-0.00539406	-0.0054191	0.00397636	0.00750864	1.59144	-0.0182555	-0.139332	0.0110918	0.0425101	-0.0062818	-0.0201814	0.00140954	0.00918548	-2.58672e-05	-0.251587	0.165736	0.0960906	-0.0448668	-0.0423059	0.00284675	0.0160603	-0.0019642	-0.00893126	0.00135761	-0.00248989	-0.0358398	-0.0381079	-0.00313884	0.0169272	0.00645894	-0.00944598	-0.00963359	-0.00559685	0.00181851
Ulemica_invisa	-0.0375671	0.00299601	0.00631405	-0.00347113	-0.00706859	0.00701114	0.00886513	-0.00182951	-0.00651736	0.00447293	1.57477	-0.00732396	-0.154379	-0.00530405	0.0458685	-0.00521647	-0.0252621	0.00121689	0.0091608	-0.00180849	-0.291214	0.00346521	0.104895	-0.0511573	-0.0466429	-0.0183728	0.00616073	0.00142802	-0.0155676	-0.0017729	-0.00753692	0.026832	0.0480587	-0.0116708	0.00873419	-0.00336734	-0.00707198	0.0309783	0.00262804	-0.0106255
Whatcheeria_deltae	-0.0470216	0.00631862	0.0145565	-0.00304887	-0.00910393	0.00405318	0.00634295	-0.00120625	-0.00561565	0.00113395	1.61872	-0.0135612	-0.170384	0.00711325	0.0541229	-0.00675453	-0.0280087	0.00384709	0.0153733	-0.00153862	-0.16722	0.0479329	0.0627374	-0.0190201	-0.0434294	0.00855992	0.025172	-0.000270872	-0.0146237	4.77468e-05	-0.00745369	0.000662994	-0.00738922	-0.00193364	-0.011022	0.00210966	0.00700075	0.000840083	-0.00447806	-0.000651921
Youngina_capensis	-0.0453271	0.0166598	0.012615	-0.0108988	-0.00547566	0.00677426	0.00178839	-0.00370657	-0.00198115	0.00254494	1.60537	0.00847413	-0.16552	-0.00424529	0.0522849	0.00404107	-0.0251596	-0.00366475	0.0150007	0.00158495	-0.194903	0.0543189	0.0589623	-0.0236498	-0.0236402	0.00486033	0.0155574	-0.0049608	-0.014077	-0.000526634	0.000234036	-0.0532993	0.0812117	0.0100007	-0.030299	-0.00318253	0.00838125	0.00387461	-0.0040805	-0.00332658

## Sheet: I Occlusal PCA Axes
		PC1	PC2	PC3	PC4	PC5	PC6	PC7	PC8	PC9	PC10	PC11	PC12	PC13	PC14	PC15	PC16	PC17	PC18	PC19	PC20	PC21	PC22	PC23	PC24	PC25	PC26	PC27	PC28	PC29	PC30	PC31	PC32	PC33	PC34	PC35	PC36	PC37	PC38	PC39	PC40	H1_A	H2_A	H3_A	H4_A	H1_SynSaur	H2_SynSaur	H3_SynSaur	H4_SynSaur
	Variation explained	42.8286	21.1884	15.6186	4.22453	3.24588	2.45849	2.11828	2.02972	1.29598	0.854847
Taxon
Acheloma_sp		0.0392215	0.0467524	-0.0876828	-0.0030137	0.0285432	0.0214523	0.00523551	-0.00660374	0.0159195	0.00429727	-0.0159599	0.011639	-0.0122213	-0.00234101	0.0130003	-0.00982025	0.00405329	0.00613979	-0.00412328	0.00248446	0.00643374	-0.00152893	-0.00520142	-0.00201836	0.00244354	0.00126609	0.00123735	0.00154995	-0.00220317	-0.00322982	-0.00153604	0.00030599	-0.00295863	0.00386533	-0.00181119	0.000437629	0.000201913	-0.00050703	-0.0014355	-0.000438289	Non-amniote	Non-amniote	Non-amniote	Non-amniote	Non-amniote	Non-amniote	Non-amniote	Non-amniote
Acroplous_vorax		0.0769868	-0.0493049	-0.108154	-0.006909	-0.00977535	0.0344072	-0.0390551	-0.00614429	-0.00961456	-0.010144	-0.0150906	-0.0151124	0.0135557	0.00769373	-0.00197289	0.00189237	0.00394196	-0.00284582	0.00455426	-0.00673529	-0.0032768	-0.00362121	0.00626885	0.00183099	0.000785178	0.0012282	-0.00134321	0.000213574	0.00043397	0.00206478	-0.000170566	-0.00144332	0.000165317	-0.00278099	-0.000454038	-0.000922771	-0.0030949	0.000449705	-0.000356341	0.00145882	Non-amniote	Non-amniote	Non-amniote	Non-amniote	Non-amniote	Non-amniote	Non-amniote	Non-amniote
Aelurosaurus_felinus		0.00930741	0.0144141	-0.0291216	0.0100153	0.0386255	-0.048849	0.007895	-0.0324233	-0.0191833	-0.0306558	-0.0237881	-0.00150747	0.0111948	0.00545618	0.0044791	-0.0112918	-0.00966541	-0.0169362	0.0032796	-0.010111	-0.00966429	-0.00334541	0.00559837	-0.002389	0.00314484	0.00420805	-0.00178141	-0.00636608	0.0028005	-0.00715479	0.00134581	-0.00159194	0.00248127	0.000618688	-0.00282505	-0.00227498	0.000509743	-0.00168354	-0.00060355	-0.00036559	Amniote	Amniote	Amniote	Amniote	Synapsida	Synapsida	Synapsida	Synapsida
Alveusdectes_fenestratus		-0.0259931	0.0040528	0.0442901	0.0264772	0.0280742	-0.012666	0.0185192	-0.0314612	-0.0147972	-0.0132041	-0.00472467	-0.0105193	-0.0133318	-0.00570719	0.0131238	0.00657478	0.00167614	0.00273242	-0.0080328	0.0124307	0.000126861	-0.00678286	0.00713136	-0.000964544	-0.000778803	0.00578548	0.00264889	-0.00153753	0.00080741	0.00345311	-0.000419779	0.000878608	-0.00175435	0.000870116	0.000112651	0.00165236	-0.000350126	0.00112481	0.000738038	-5.32003e-05	Amniote	Amniote	Amniote	Amniote	Synapsida	Synapsida	Synapsida	Synapsida
Aulacephalodon_kapoliwacela		-0.0135218	-0.0126875	0.0105494	0.0169281	0.0103294	-0.0667752	0.000610023	-0.00412304	0.0306029	-0.0224407	-0.00615088	0.0258776	0.0257014	0.0164499	-0.0128846	-0.00098691	0.00639543	-0.0062471	-0.00769931	0.00174177	0.0135911	0.0030212	0.00311114	-0.00357785	-0.00520703	-0.0100667	0.00198951	0.00525211	-0.00529144	-0.000997376	0.00556011	-0.00159652	0.00224208	0.000289484	-0.0017625	0.00239369	0.000426997	0.000453278	-0.000435093	0.000415668	Amniote	Amniote	Amniote	Amniote	Synapsida	Synapsida	Synapsida	Synapsida
Belebey_vegrandis		-0.0183161	-0.0241518	0.0632464	-0.043329	-0.0468043	0.046311	-0.00226441	-0.0041571	-0.0057615	-0.00587768	-0.0063227	0.0241673	0.0119756	-0.0153365	-0.00634526	0.0152379	-0.0101333	-0.00825031	-0.00671466	-0.0125654	-0.0061209	-0.0031836	-0.000436641	0.0101682	-0.00123684	-0.00568422	0.00161921	-0.00373652	0.000872152	0.00014535	0.001095	-0.00347551	-0.00478312	-0.000125446	-0.000318576	0.000785666	0.00103173	0.000933484	0.000343887	2.10106e-05	Amniote	Amniote	Amniote	Amniote	Sauropsida	Sauropsida	Sauropsida	Sauropsida
Bolosaurus_major		-0.0753877	-0.0211323	-0.0303554	0.0228945	0.00851513	-0.000851777	-0.0259066	0.0131795	0.0361361	0.00694425	0.012376	0.0155132	-0.002384	-0.00399969	-0.000555997	-0.00671249	-0.00878926	-0.0109078	0.00100448	0.00646674	-0.000521901	-0.00208971	-0.00346424	-0.0082278	-0.00278436	0.00160985	-0.00530498	-0.000669258	0.00134363	0.00166338	0.000616911	0.00541364	0.00106659	0.00131212	-0.000776806	-0.00226899	-0.00258814	-0.000412088	2.24208e-05	0.000556848	Amniote	Amniote	Amniote	Amniote	Sauropsida	Sauropsida	Sauropsida	Sauropsida
Brachyprosopus_broomi		-0.00962428	0.0640705	0.0537646	-0.0399826	-0.0112497	-0.0249018	-0.0160656	0.0162025	0.00132088	0.00891002	0.00222884	0.00545722	0.0161312	-0.00755701	0.00250868	0.00472116	-0.00769605	-0.00899092	3.31854e-05	-0.00698516	-0.00505514	-0.00279128	0.00205011	-0.00543953	0.00903962	-0.000808207	0.00110735	0.0028561	-0.00768046	0.00591378	0.00215252	-0.000492962	0.000118004	-0.000821404	-0.00082866	0.000811548	-0.000315479	-0.000344504	0.000126931	0.000400641	Amniote	Amniote	Amniote	Amniote	Synapsida	Synapsida	Synapsida	Synapsida
Captorhinus_aguti		-0.0706807	-0.0243844	-0.0563528	0.0296768	0.0110187	0.0191018	-0.0023035	-0.0352633	0.0135436	0.00598556	0.0117015	0.0159148	-0.0152379	0.0276597	0.00417237	0.00671671	-0.00613646	-0.000502251	0.00283765	-0.00826971	-0.00643296	0.00400609	-0.00338368	-0.00302712	-0.0039824	0.0028443	-0.00183955	0.00219226	-0.000369813	-0.001967	-0.00182578	-0.00131491	0.000456793	-0.00202183	0.00028704	0.00186536	-0.000413897	-0.000335406	-9.6501e-05	0.000659423	Amniote	Amniote	Non-amniote	Amniote	Sauropsida	Sauropsida	Non-amniote	Sauropsida
Carrolla_craddocki		-0.0496614	-0.00776672	0.00647631	-0.0800335	0.00528664	0.0521962	0.0108074	0.0276741	0.0167659	0.019917	-0.00261932	0.0294374	0.000503322	0.0208258	0.00909279	-0.00120918	-0.00963507	-0.00840091	0.0123727	0.00790875	0.00241236	0.00110486	0.00144797	0.00956162	0.00107068	-0.00235422	0.0008016	-0.00236518	0.000418546	0.000737972	0.00168159	0.00158795	0.0033779	-0.000659858	0.00311661	-0.00172834	-0.000650713	0.00181313	-0.000114987	-0.000587323	Non-amniote	Non-amniote	Non-amniote	Amniote	Non-amniote	Non-amniote	Non-amniote	Sauropsida
Crassigyrinus_scoticus		0.0028712	-0.0310321	-0.0798531	-0.00413522	0.00862148	0.0145265	-0.000810855	-0.0339985	0.0155357	0.000110389	0.00400259	-0.000259318	0.00249258	-0.00282945	0.0165229	-0.00998072	0.00666241	-0.00441869	-0.00457452	0.000526034	-0.00499743	-0.00272628	-0.00935221	-0.00118691	-0.00233314	-0.00462272	0.0017456	-0.00233932	-0.000508929	0.000906112	0.00390431	-0.00351701	0.000599715	0.00358537	0.000474882	-0.00107636	-0.000541895	-0.000168035	-0.000846129	0.000292496	Non-amniote	Non-amniote	Non-amniote	Non-amniote	Non-amniote	Non-amniote	Non-amniote	Non-amniote
Daptocephalus_leoniceps		0.0114986	0.0103779	0.0941535	-0.0142685	0.00566185	-0.0347281	0.0273049	0.0216366	0.0254223	-0.021409	-0.0322596	-0.00254547	0.0140555	0.0228042	-0.00203205	0.00403397	-0.00651942	-0.00596151	-0.0159772	0.00487612	0.00890604	0.0153357	0.00329065	0.001245	-0.00439593	0.00453841	0.00524261	0.00444738	0.00649252	0.00331617	-0.00263623	0.00064837	0.00189805	0.00230162	0.0012731	-0.000131242	-0.00115204	0.000146926	4.9038e-05	0.000101814	Amniote	Amniote	Amniote	Amniote	Synapsida	Synapsida	Synapsida	Synapsida
Delorhynchus_cifelli		-0.0285313	-0.11427	0.0204145	-0.00198808	0.00323355	0.0666569	0.0131442	-0.00998509	-0.02776	-0.0124139	0.0165448	-0.00769656	0.0312438	-0.0090738	-0.000249534	-0.00632868	-0.00739091	-0.00454076	-0.00138423	-0.0036147	0.00531985	0.00417235	0.00330247	0.00141751	-0.006201	0.00354008	-0.00133859	-0.00312174	-0.000115746	0.00288002	-0.00177481	0.00450337	0.000722284	-0.000767919	-0.00102147	0.0018883	0.00221577	-0.00259455	0.000448554	0.00114247	Amniote	Amniote	Amniote	Amniote	Sauropsida	Sauropsida	Sauropsida	Sauropsida
Delphaciognathus_paucidens		-0.258962	0.0877923	-0.122539	0.0563071	-0.0513274	-0.0116719	0.00772769	-0.00200295	-0.00799412	-0.0114315	-0.0128993	-0.00128856	-0.00347444	-0.0189326	0.0139904	0.00380919	0.0180188	-0.0132461	0.0271143	0.00254027	0.00600178	0.0149798	0.00554295	0.0082323	0.00445608	-0.00388464	-0.00687441	0.00562645	0.00250824	-0.000864254	-0.00193298	-0.000317319	-0.000476702	0.00104371	0.000673183	-4.90712e-05	0.000308166	-0.000721521	-0.000563846	0.000614421	Amniote	Amniote	Amniote	Amniote	Synapsida	Synapsida	Synapsida	Synapsida
Dendrerpeton_helogenes		0.0291614	-0.00101653	-0.107428	-0.024032	0.0286164	0.00699169	-0.0249201	-0.00454176	0.00544501	0.0110563	0.00856189	-0.0102792	0.00758409	0.00723845	0.00364031	-0.00233952	0.0109217	-0.00574242	0.00564211	0.00242189	0.0033358	-0.00189482	-0.00874593	0.00174622	0.000103462	0.00511724	0.00515365	-0.00345276	0.00444006	0.00552468	0.00578795	0.000707313	0.00110517	0.00134762	0.000959499	0.000766916	-3.84996e-05	-0.000366975	0.0011898	-0.000178897	Non-amniote	Non-amniote	Non-amniote	Non-amniote	Non-amniote	Non-amniote	Non-amniote	Non-amniote
Desmatodon_hesperis		-0.0432687	-0.131154	-0.00537992	0.00728291	0.0141314	-0.0272118	0.00873387	-0.0215267	0.00551829	0.00578569	0.00417695	-0.0108806	-0.0171924	0.0286504	0.0116042	0.00895572	0.00286611	-0.0018443	0.00157504	0.00495015	0.0104025	-0.00705992	-0.0111225	0.00595039	0.00670719	0.00105079	-0.00125566	-0.00124142	-0.00487566	-0.00409665	-0.000362833	0.0007669	0.00197973	-0.00053015	-0.0020193	0.00256886	0.000909515	-0.000676695	0.00171413	0.000297869	Non-amniote	Amniote	Non-amniote	Non-amniote	Non-amniote	Synapsida	Non-amniote	Non-amniote
Diadectes_absitus		-0.0131797	-0.0236654	0.0358249	-0.011076	0.0041844	0.0113686	0.00360182	-0.0236588	0.00649416	-0.00776123	-0.0066174	0.01111	-0.0145213	0.00745229	0.00189224	0.00643817	0.015126	-0.00633902	0.000580403	0.00104562	0.0043492	-0.000470185	-0.000149707	-0.00216174	-0.00234422	-0.00178541	0.00248587	-0.00548282	-0.0049123	0.000580026	-0.00140262	0.00114116	-0.00207207	6.69716e-05	0.000188091	-0.0045629	0.0019857	-5.24057e-06	-0.000406847	0.000233594	Non-amniote	Amniote	Non-amniote	Non-amniote	Non-amniote	Synapsida	Non-amniote	Non-amniote
Diadectes_lentus		-0.0745554	-0.0873918	0.0540501	0.0287669	0.0686811	-0.00967324	-0.00593165	-0.0182537	-0.0322837	0.0187982	0.00445322	0.0135099	-0.00952824	0.0109851	-0.00958318	-0.00707268	-0.00522463	-0.00347705	-0.00100139	0.00944971	0.0117698	-0.0113317	0.0092452	0.000640591	0.00845515	-0.00898318	-0.000624545	-0.00353406	0.00722926	0.00439303	-0.000352782	0.000832381	-0.00142284	-0.00092079	0.00105006	0.000142543	6.77291e-05	-0.00186896	-0.00101546	-0.000163169	Non-amniote	Amniote	Non-amniote	Non-amniote	Non-amniote	Synapsida	Non-amniote	Non-amniote
Dicynodon_lacerticeps		-0.0722745	-0.0970528	0.0588964	-0.0338027	-0.0341985	0.00577482	0.0217678	0.0357651	0.0430966	0.00306113	0.0156003	-0.0265528	-0.0171578	-0.00884094	0.00432855	0.0128749	-0.00470166	-0.00599077	0.00101467	0.0123026	-0.00586394	-0.00853453	0.00256318	-0.0111172	-0.00713876	-0.00146807	-0.00364531	-0.000672351	0.00415845	-0.000299999	-0.00398277	-0.00677354	0.00213338	0.000647202	-0.00184928	-0.000107835	0.000806106	-7.46823e-05	-6.71116e-05	0.000274325	Amniote	Amniote	Amniote	Amniote	Synapsida	Synapsida	Synapsida	Synapsida
Dicynodontoides_sp		0.00576933	0.0351865	0.0311908	-0.0457549	-0.0653165	-0.017772	-0.0346073	0.000133774	0.0146037	-0.00149729	-0.000270971	-0.00465956	-0.00314747	-0.00968401	0.0234153	-0.00221448	-0.0143911	-0.0159933	-0.0177063	-0.00460655	0.0017417	-0.00839985	-0.000123073	0.00967818	-2.16242e-05	0.000567587	-0.00249158	0.00574662	0.00110787	-0.00501034	0.000657687	0.00169003	-0.000561218	4.14117e-05	0.0017419	-0.00122778	0.000219688	-0.00217631	0.00123045	-0.000291497	Amniote	Amniote	Amniote	Amniote	Synapsida	Synapsida	Synapsida	Synapsida
Diictodon_feliceps		-0.132174	-0.0430477	-0.0117853	-0.0367318	-0.0158286	-0.00682826	-0.0129143	0.05532	0.0497294	-0.0504272	0.0507291	-0.0013831	0.0098755	0.0123253	-0.00125398	-0.0111911	0.0121207	0.0142086	0.00726852	0.00671775	-0.00712342	-0.00492527	0.00862339	0.002634	0.00406038	0.000164379	0.000457036	0.0002593	-0.00192793	-0.0039782	0.000162297	0.00327669	-0.00221085	0.000261141	0.000724797	0.000383107	-0.000521705	-0.000884369	-0.000182416	-0.000386892	Amniote	Amniote	Amniote	Amniote	Synapsida	Synapsida	Synapsida	Synapsida
Diplocaulus_magnicornis		0.0571835	-0.17144	0.00125286	-0.0594636	-0.0125828	0.0304887	-0.0205415	-0.0021527	-0.02162	-0.00919418	-0.00879311	-0.00634718	0.0013151	-0.0088302	-0.0098786	0.0113866	0.0028814	0.00366436	0.00882881	-7.16805e-05	0.00301574	0.00150734	-0.0039246	-0.00606047	-0.00126323	-0.00226071	0.00304109	0.00842016	0.00136638	-0.00122179	0.000388679	0.00394693	0.000161104	0.000178787	-0.00142918	-0.00077541	0.000516103	0.000574166	0.000941024	-0.00018759	Non-amniote	Non-amniote	Non-amniote	Non-amniote	Non-amniote	Non-amniote	Non-amniote	Non-amniote
Doragnathus_woodi		0.476727	-0.00862207	-0.0138594	0.0785578	-0.0596804	-0.0430074	0.0302433	0.0385636	-0.0197526	0.014196	0.0336144	0.016258	0.00414462	0.00537185	-0.0021073	0.0156497	-0.004177	-0.00426652	0.0061171	0.00593874	-0.000977259	0.00970416	-0.00119922	0.00270544	0.000366833	0.00167264	0.00162409	-0.00146008	-1.48375e-06	-0.00162454	0.00365288	-0.00264583	-0.0013483	-0.000208458	0.00076761	-0.000366646	-5.8886e-05	-0.00153422	0.000509994	-0.000685354	Non-amniote	Non-amniote	Non-amniote	Non-amniote	Non-amniote	Non-amniote	Non-amniote	Non-amniote
Edaphosaurus_boanerges		-0.0486463	-0.0159228	0.0654407	0.0718076	-0.00822238	0.0238389	-0.0172276	-0.00698195	0.00946073	0.000235821	0.00931869	0.0137768	-0.012447	-0.0336331	-0.00877415	-0.00927089	0.00849361	-0.00739965	-0.00335197	-0.00561931	0.00781977	-0.00452903	0.00850157	-0.000728935	0.00210119	0.00848643	0.00644532	0.000787315	-0.00313344	0.00061228	0.00405501	-0.00156494	0.00366818	-0.0024751	0.000115404	-9.7542e-05	-0.00144658	0.000230581	5.3689e-06	-0.00105792	Amniote	Amniote	Amniote	Amniote	Synapsida	Synapsida	Synapsida	Synapsida
Edaphosaurus_cruciger		-0.0208816	-0.0349652	0.0396183	0.0320312	0.0170267	-0.0104409	-0.010601	0.0263358	0.0075487	-0.023482	-0.00600648	-0.00618744	-0.019896	-0.0320688	-0.00933655	-0.0173257	-0.0191135	0.00995956	0.00317271	0.00242825	-0.00651015	0.00556589	-0.0054154	0.000656945	0.00443474	6.5446e-05	0.00443072	0.000732802	-0.000591838	-0.000927694	0.00624323	0.000387034	0.00284354	0.00109729	0.00280657	-0.000783734	0.00245989	0.000461647	1.69224e-05	0.00137637	Amniote	Amniote	Amniote	Amniote	Synapsida	Synapsida	Synapsida	Synapsida
Endothiodon_tolani		-0.0160456	-0.125669	0.0665308	0.0309098	-0.0553054	-0.0227632	0.000864561	-0.050789	-0.00632118	-0.0179543	0.00139018	0.0301747	0.00876333	-0.0140835	0.0120233	0.00662396	0.00543955	0.0155132	0.00121659	-0.0119464	0.00745066	-0.00445683	-0.0080694	-0.0115877	0.00200716	-0.00283857	-0.00544449	-0.000578615	0.00252221	-0.00228194	-0.00283663	0.00145623	0.000258631	0.00058865	0.00375126	-0.000417427	-0.000785628	0.00127405	0.000553772	-0.000360693	Amniote	Amniote	Amniote	Amniote	Synapsida	Synapsida	Synapsida	Synapsida
Eoherpeton_watsoni		0.0122312	0.0142634	-0.105139	-0.023045	0.0405525	-0.0492811	0.0112979	-0.0114907	0.0198162	0.0147383	0.00437178	-0.0127465	-0.0143035	-0.0166002	-0.0167639	-0.00752101	-0.00949368	-0.00827593	-0.00111146	-0.00363558	0.00355637	0.000247502	0.000971671	-0.000266801	-0.00165699	-0.00856777	-0.00176992	0.00133595	-0.00135424	0.0020394	-0.00144855	0.00133191	-0.00225141	-0.000316552	-0.000886193	-1.44249e-05	0.000610029	-0.000223107	0.001089	-0.00069004	Non-amniote	Non-amniote	Non-amniote	Non-amniote	Non-amniote	Non-amniote	Non-amniote	Non-amniote
Eryops_megacephalus		0.340921	-0.00589995	-0.0360336	0.0445638	-0.0127046	-0.0106642	0.0334138	0.0268086	-0.00481055	0.00213811	0.00402688	0.00791882	-0.0157199	0.0109705	0.0046305	-0.0122182	-0.00372083	-4.22624e-05	-0.005568	-0.00865154	-0.00398324	-0.00364936	0.00549339	-0.00126212	-0.00598916	-0.00472081	-0.0013002	-0.00163649	-0.00251275	0.00147207	-0.00303464	0.00274905	-0.0015172	0.0011402	0.00240712	-0.00024445	0.000701597	0.000164013	-0.00153883	0.000596554	Non-amniote	Non-amniote	Non-amniote	Non-amniote	Non-amniote	Non-amniote	Non-amniote	Non-amniote
Estemmenosuchus_mirabilis		-0.0477747	-0.0475949	-0.0164678	-0.00102936	0.0660341	-0.0102021	0.0861962	-0.00881563	-0.02968	0.0218178	0.00710089	0.0123393	0.0116624	0.00282077	-0.0223197	-0.0139643	0.00871995	-0.010929	0.00465524	0.00293377	-0.00785508	-0.00650977	-0.000457578	0.00240242	-0.00516741	0.00820772	-0.00506982	0.00813872	-0.00314827	-0.00269531	-0.00172734	-0.000906021	-0.00175972	0.000809556	0.00185218	-0.00156895	0.000623504	0.000830658	0.0013615	0.000409669	Amniote	Amniote	Amniote	Amniote	Synapsida	Synapsida	Synapsida	Synapsida
Euptychognathus_bathyrhynchus		-0.0620527	-0.0448806	0.0804233	0.0519301	-0.0486333	0.0100941	0.0356828	0.0128709	0.0113798	0.00321614	-0.00603175	-0.0146606	-0.0158539	0.00328054	-0.00814026	0.00241305	-0.00753858	-0.00485418	0.00823265	-0.00267704	0.00432242	-0.0142936	-0.0039109	0.00587519	-0.00439283	0.00388135	-0.000404662	0.00356817	0.00253349	0.00156919	0.0050108	0.000505855	-0.00211326	0.00101411	-0.000174088	0.00126493	-0.00148065	0.000676572	-0.00139079	0.000598337	Amniote	Amniote	Amniote	Amniote	Synapsida	Synapsida	Synapsida	Synapsida
Euryodus_dalyae		-0.0242895	-0.0482664	0.00370327	0.0027667	0.0160331	0.0366636	0.0235447	0.000586089	-0.000246305	-0.000137703	-0.000407235	-0.00532941	0.010781	0.00787196	-0.0055118	0.00572574	-0.0013293	0.00738516	-0.0104807	-0.0051896	-0.00236491	0.00432672	0.000526236	-0.00533009	0.00123328	0.00212694	-0.00597836	0.00238607	-0.00282952	-0.00191702	0.00240258	-6.90966e-06	-0.00109885	-0.00328283	0.00114317	-0.00148794	-0.00160724	-0.000358837	-0.00037582	0.000123962	Non-amniote	Non-amniote	Non-amniote	Amniote	Non-amniote	Non-amniote	Non-amniote	Sauropsida
Feeserpeton_oklahomensis		0.00400313	-0.0388816	-0.0180987	0.00962066	0.0144965	0.0325553	0.00285029	-0.00683569	0.00709729	0.00716044	-0.00314151	-0.000550157	0.012904	-0.00342167	0.00443303	-0.00727788	0.00839756	0.00193102	-0.00695648	0.00359995	-0.00211119	0.000351957	-0.00128732	0.000423287	0.000570725	-0.000289764	-0.000577157	-0.00218295	0.000385863	-0.0012311	0.000275791	-8.75241e-05	0.00118811	-5.77439e-07	0.0021881	0.000705603	0.00111679	-0.00088338	0.000202861	-0.000557888	Amniote	Amniote	Amniote	Amniote	Sauropsida	Sauropsida	Sauropsida	Sauropsida
Galeops_whaitsi		0.0390335	0.11902	-0.013764	-0.0488302	-0.0123401	1.41263e-05	-0.0261077	0.0208979	-0.00761443	-0.0184755	-0.0157534	0.0295227	-0.00467796	-0.00802429	-0.00247538	-0.00709148	0.00182175	0.0125969	-0.0095934	0.0126377	-0.000610629	-0.00259296	-0.00334181	0.0074368	-0.00254836	0.00378064	-0.00475315	-0.000974989	-0.00418289	0.00400949	-0.00421023	-0.000316199	-0.00194158	0.000515655	-0.000477253	0.00160633	-0.000459191	-0.000582429	-0.000214639	0.000140171	Amniote	Amniote	Amniote	Amniote	Synapsida	Synapsida	Synapsida	Synapsida
Gansurhinus_naobaogouensis		-0.0855366	-0.0561246	0.108003	0.0632134	0.0414556	-0.0135836	-0.0533152	0.0309464	0.00938474	0.0144859	-0.013575	-0.00709466	0.0182583	0.00686387	0.0129183	0.00222045	-0.00745477	0.010142	0.00998409	-0.00347745	-0.00459227	-0.00162598	-0.000377605	-0.00350609	-0.00261073	0.00206213	-0.00332974	0.00060029	-0.00313539	0.00160787	0.00172771	-0.00157421	-0.00212993	-3.05872e-05	0.00105971	0.00063684	0.00149807	3.0154e-05	-0.00104926	3.58846e-05	Amniote	Amniote	Non-amniote	Amniote	Sauropsida	Sauropsida	Non-amniote	Sauropsida
Greererpeton_burkemorani		0.0382672	-0.00984044	-0.00381232	-0.0203833	0.0208723	0.0359789	-0.0127842	0.00581875	-0.01513	0.00868497	-0.00820544	-0.00667013	-0.00245371	0.00832184	0.0044781	0.0166356	0.00056277	0.000383554	0.000785831	0.00911505	0.00640919	0.00425085	-3.89508e-06	-0.00232026	0.00129058	0.00366243	-0.00241721	-0.00244761	-0.00466378	-0.00218303	0.00723799	0.000111328	-0.00331951	0.0023827	-0.000426451	-7.57778e-05	-0.00146773	-0.000204722	-0.000282138	0.000511702	Non-amniote	Non-amniote	Non-amniote	Non-amniote	Non-amniote	Non-amniote	Non-amniote	Non-amniote
Huskerpeton_englehorni		-0.00693824	-0.0343813	-0.125462	0.0101651	0.0243386	0.0047369	-0.00555174	-0.0206194	0.0275109	0.00918436	0.0257339	0.0124668	0.0123849	-0.0130974	0.00175026	-0.00831496	-0.000422826	-0.00111578	0.00349437	-0.00735288	0.0072522	0.00154978	-0.001657	0.00112006	-0.00574428	0.000635449	0.00226351	-0.00178953	0.003366	-0.000280697	-0.000676306	-0.00293684	-0.00162618	6.32056e-05	-0.000619534	0.00149629	-2.55001e-05	0.00141968	0.000367018	0.000164101	Non-amniote	Non-amniote	Non-amniote	Amniote	Non-amniote	Non-amniote	Non-amniote	Sauropsida
Jonkeria_truculenta		0.0603944	0.0157156	-0.032565	-0.104453	0.0518207	-0.0548169	-0.00445475	0.0178612	-0.0291312	-0.00578566	-0.0004194	-0.0060751	-0.0225163	-0.00955127	0.0134712	0.00411985	0.00275394	-0.0037228	0.0102354	-0.011531	-0.000210108	0.0058024	-2.56073e-05	-0.00368867	-0.00662477	0.00359985	-0.0039492	-0.000789271	0.001569	0.00162616	0.00524087	0.0029197	-0.00152236	-0.00215882	0.000729291	0.00261105	0.000650098	0.0008021	-0.00101045	-0.00103017	Amniote	Amniote	Amniote	Amniote	Synapsida	Synapsida	Synapsida	Synapsida
Kembawacela_kitchingi		-0.0300404	-0.225481	0.0430426	-0.00555866	-0.0337262	-0.0331379	0.00556614	-0.00217138	0.0202382	0.00510489	-0.00104175	-0.0235669	-0.0104355	0.00145912	-0.0141016	-0.00111886	0.0252383	-0.0145805	-0.0166233	-0.00469961	-0.0103605	0.00988399	-0.0113406	0.00536047	0.00835919	0.00207307	-0.00128704	-0.00203293	-0.00156277	0.00464576	-0.00287878	0.000776249	-0.000130089	-0.00175701	0.00121406	0.000376129	0.000490057	1.36842e-05	-0.00157322	-0.000109632	Amniote	Amniote	Amniote	Amniote	Synapsida	Synapsida	Synapsida	Synapsida
Labidosaurus_hamatus		-0.080432	-0.0131412	-0.061563	0.0277266	0.00277227	0.0276821	0.00351655	-0.039084	0.0148709	-0.0184585	0.0166441	0.01194	-0.0293198	0.0276057	0.00368061	0.0169076	-0.0138507	0.00665039	0.00108122	-0.00757842	-0.000311907	0.00552521	0.00949635	0.00179126	0.00325305	0.00448684	0.00273705	0.00265404	0.000279561	0.00417861	-0.000578463	-0.00238504	0.00155888	-2.14423e-05	0.00031843	-0.000829041	0.00282703	0.000325234	-4.56305e-05	-0.000221168	Amniote	Amniote	Non-amniote	Amniote	Sauropsida	Sauropsida	Non-amniote	Sauropsida
Laosuchus_hun		-0.0196087	0.135042	-0.00235345	0.0275578	-0.00457901	0.0220073	0.0122103	-0.00841641	0.0135892	-0.000719901	-0.00617996	-0.00651912	0.0107513	-9.13424e-05	0.00295349	-0.00209781	0.00675957	0.00153479	0.00539335	-0.00597996	0.00182887	-0.000723948	0.00397004	-0.00094558	0.00177814	0.00297287	0.00635003	-0.00244265	-0.00122283	0.000397537	-0.00370932	0.000789785	-0.00069988	-0.00273629	0.000334202	0.000678316	0.000316214	6.2245e-05	-6.62608e-05	-0.000103398	Non-amniote	Non-amniote	Non-amniote	Non-amniote	Non-amniote	Non-amniote	Non-amniote	Non-amniote
Lycideops_longiceps		0.00940665	0.155599	0.073491	0.00566107	-0.0213161	0.029096	-0.0195147	0.0167122	-0.035203	0.00562528	0.0188887	-0.0150679	0.00342372	0.0167765	-0.0160736	-0.00866428	0.00425035	0.00420822	-0.00336357	-0.00851085	0.00647236	-0.00170162	-0.00431051	0.00220404	0.000868399	-0.00378045	-0.00703261	-0.000613729	0.00220976	-0.00287792	-7.76241e-05	-0.000106416	0.00487492	0.00203203	-0.000547407	0.00217067	0.000299912	0.000920362	-0.000890033	-0.000645832	Amniote	Amniote	Amniote	Amniote	Synapsida	Synapsida	Synapsida	Synapsida
Lycosuchus_vanderrieti		-0.0735645	0.061008	-0.0118267	0.0166385	0.00430615	-0.00816062	0.0230264	-0.0245562	0.0223912	-0.00533197	-0.0181174	0.00485903	-0.00220521	-0.00621448	-0.0114085	0.0105926	-0.0113176	-0.00517557	0.00737366	0.00997995	-0.0218699	0.00194836	0.00168898	-0.00433913	0.00288555	-0.00346546	0.000970089	-0.00417881	0.00125264	-0.00150644	-0.0017162	0.00291781	-0.000571157	-0.00012546	0.00205044	0.00492887	-0.0014943	-0.000234257	0.00052862	-0.000402822	Amniote	Amniote	Amniote	Amniote	Synapsida	Synapsida	Synapsida	Synapsida
Megalocephalus_pachycephalus		0.0177015	0.057649	0.0104024	-0.0413585	0.0126704	0.042115	0.0152813	0.00809866	-0.00184642	-0.011246	-0.00358024	-0.0115568	0.00702181	0.00354832	0.00231651	-0.0113629	0.00528505	-0.00351715	0.003361	0.00243758	-0.00656896	0.00424033	-0.00419236	-0.00465148	-0.00370622	-0.00117614	0.00145615	0.00120761	0.00244497	-0.000838123	0.00116839	-0.0026699	0.000717724	-0.000508377	0.00173525	-0.000604871	0.00113981	0.00026036	-0.000156835	-0.00119655	Non-amniote	Non-amniote	Non-amniote	Non-amniote	Non-amniote	Non-amniote	Non-amniote	Non-amniote
Moradisaurus_grandis		-0.0203807	-0.134184	0.153959	0.0581843	0.0322469	-0.019416	-0.0482226	0.0323103	-0.0100958	0.0126296	-0.0265345	0.000405337	-0.000577676	0.00553706	0.0158549	-0.00391783	0.00904399	0.008743	0.00404476	0.00189149	-0.00771298	-0.00329789	0.00472561	0.0082708	-0.00872845	-0.00368501	-0.0040414	0.00178081	-0.00130257	0.00045679	-0.000767019	-0.000345683	0.00193009	-0.00171118	-0.000366829	-0.000199782	0.00113082	0.000558267	0.00114042	-0.000494638	Amniote	Amniote	Amniote	Amniote	Sauropsida	Sauropsida	Non-amniote	Sauropsida
Moschops_capensis		-0.516161	-0.0435823	-0.263282	0.0311811	-0.0645897	-0.0277791	0.0223412	0.0776251	-0.0611606	0.0132748	-0.00614938	0.00301606	0.00208322	0.00974709	0.00209726	0.00135403	-0.00462442	0.00669734	-0.0156134	-0.000873044	-0.00313666	-0.00267238	-0.000619876	-0.0040217	-0.00303931	-0.00140684	0.0061161	-0.00282067	-0.00112843	7.75058e-05	0.00110657	0.000175688	0.000114204	-0.000422234	-0.000371344	-0.000580429	8.97491e-05	0.000424613	0.000200303	-0.000437321	Amniote	Amniote	Amniote	Amniote	Synapsida	Synapsida	Synapsida	Synapsida
Niassodon_mfumukasi		-0.00380392	-0.0900623	0.0485714	-0.0755882	-0.122483	-0.0394953	-0.000614266	-0.0840946	0.00188281	0.0538856	-0.00484315	-0.00785213	0.00458348	0.0122265	-0.00107759	-0.0283193	-0.00525173	0.0183524	0.00762833	0.00637725	-0.00401752	0.0077358	0.0105149	-0.000963972	-0.0012433	0.00189943	0.00148995	-0.00129539	-0.000790347	2.86163e-05	0.00250432	-2.93675e-05	-0.000605365	0.00028277	-0.00133926	6.25073e-05	-5.42871e-05	2.97641e-05	-8.94525e-05	5.44722e-05	Amniote	Amniote	Amniote	Amniote	Synapsida	Synapsida	Synapsida	Synapsida
Nochelesaurus_alexanderi		0.0651759	-0.137014	-0.119446	-0.0347155	-0.0169023	0.00656629	-0.00786652	-0.0195642	-0.00346382	-0.000966624	-0.0171444	0.0110039	0.00755251	-0.0217319	-0.0259907	0.0219103	-0.00576205	0.00712299	0.00391309	0.00812374	0.00200713	-0.0066778	0.00223738	0.00379478	0.00181896	0.00379644	-0.00494686	-3.18619e-06	-0.00186569	-0.000271539	-0.000885207	-0.000503132	0.00379674	0.00337479	-0.000599389	-0.000152382	0.00102069	-0.00030269	-0.00143247	-0.000787119	Amniote	Amniote	Amniote	Amniote	Sauropsida	Sauropsida	Sauropsida	Sauropsida
Odontocyclops_whaitsi		-0.0288734	0.0733711	0.0626717	-0.0301575	0.0027448	-0.0215411	0.0260368	0.0111324	0.0167157	0.0240779	-0.00108296	-0.00116341	0.0103759	-0.00349611	0.00577322	0.0103888	-0.00224609	-0.000781779	0.000599785	-0.0117521	-0.000119416	-0.00755343	-0.00292838	0.00151832	0.000889539	0.00170844	0.00423468	0.00198476	5.87249e-05	-0.00163945	-0.0009121	0.00111312	0.000794617	-0.0030683	-0.00109959	-0.000519256	-0.000667135	-0.000936578	-0.00132565	-0.00035456	Amniote	Amniote	Amniote	Amniote	Synapsida	Synapsida	Synapsida	Synapsida
Orobates_pabsti		0.0215342	-0.0853797	0.00631684	-0.0218188	0.029744	-0.0341531	-0.00966331	-0.022566	-0.0272	-0.0231298	0.014343	0.00403629	-0.0176324	-0.0116186	0.000827732	0.00472877	0.0124262	0.0140747	-0.000318779	-0.00425179	-0.00320975	-0.000208937	0.00259972	0.00291833	-0.00305652	-0.00291658	0.00648712	0.00450469	0.00178319	0.00240773	-0.000624956	-0.000941488	-0.000110233	-0.000892343	-0.00115521	-0.00123557	-0.00213118	-0.00112006	0.000203827	-4.66786e-05	Non-amniote	Amniote	Non-amniote	Non-amniote	Non-amniote	Synapsida	Non-amniote	Non-amniote
Oudenodon_bainii		-0.0458211	0.0112476	0.0846106	-0.01255	-0.00689247	-0.0342404	0.0131954	0.0112293	0.00737011	0.003196	-0.00649701	0.00359757	0.0162667	-0.00136569	0.00524616	0.00470969	0.00737901	-0.00254653	0.00019465	-0.0021282	0.00972731	0.000202815	0.000878127	-0.00583805	0.001883	0.00597421	0.00269958	-0.00438845	0.00467084	-0.00290329	-0.00133244	0.000537834	-0.00270544	0.00125352	0.000296902	-0.0001592	0.000514008	0.000857295	0.000162094	0.000228479	Amniote	Amniote	Amniote	Amniote	Synapsida	Synapsida	Synapsida	Synapsida
Pantylus_cordatus		-0.0199401	-0.125496	0.142589	-0.0340615	-0.0157914	0.0280121	0.0166645	0.0548827	-0.0302674	-0.0132433	-0.00454327	0.00600646	-0.0143434	-0.00774264	-0.00162425	-0.0174412	-0.0059188	-0.00790397	0.0109103	0.000691363	0.0151834	0.00690328	-0.00215516	-0.00493993	0.00250764	0.000826556	0.00257027	-0.00508361	-0.00299023	-0.00120305	-0.0051829	-0.00438541	-0.000820746	-0.000153655	-0.000305436	0.00139554	-0.0013277	-0.000630825	0.000471951	3.71717e-05	Non-amniote	Non-amniote	Non-amniote	Non-amniote	Non-amniote	Non-amniote	Non-amniote	Sauropsida
Parrsboro_jaw		0.210495	0.0152614	-0.123238	0.0203763	0.0111125	0.0135051	-0.0124904	0.0109069	0.00648169	0.0186515	-0.0245198	0.0037094	-0.0114031	-0.00584698	0.00394166	-0.00860124	0.00342679	0.0115004	-0.00884129	0.00278004	-0.000723526	-0.000679872	-0.000731186	-1.85563e-05	0.00409281	0.00267362	0.00425832	0.00198652	-2.75672e-05	-0.00456468	-0.00251227	-0.002023	0.00178216	-0.00116212	0.0016942	0.00142794	-0.000477503	-0.000353002	0.000399099	0.000610873	Non-amniote	Non-amniote	Non-amniote	Non-amniote	Non-amniote	Non-amniote	Non-amniote	Non-amniote
Perplexisaurus_foveatus		0.0229315	0.152324	0.0554186	-0.00850171	-0.0271073	-0.012909	-0.0532739	-0.0060563	-0.0366381	-0.00819764	0.0104264	-0.00740126	-0.0193042	0.0155907	-0.017082	0.00355837	0.0130516	-0.00461643	-0.00285947	-0.00115342	-0.00192789	-0.000732013	0.00338587	-0.00203412	-0.00393412	0.00116494	-0.0029703	-0.00443136	0.000431977	-0.0023351	0.000337056	-0.000532267	0.00165134	0.00115045	0.00117167	-0.000348604	-0.000870235	0.00021845	0.000380423	0.000554422	Amniote	Amniote	Amniote	Amniote	Synapsida	Synapsida	Synapsida	Synapsida
Platyrhinops_lyelli		0.342783	-0.0284051	-0.07519	0.0346534	-0.0266005	0.00406287	0.00371124	0.0408584	-0.0111248	0.0163889	-0.00372642	-0.00428823	0.0102368	-0.00979307	0.0152879	0.00510439	0.0106746	-0.0045683	0.00368887	0.00197436	-0.00555398	-0.00394645	0.00513886	-0.00411326	0.002114	-0.00219857	0.00168287	0.000229273	0.00152072	0.00339092	-0.00176576	0.00295735	0.00240378	0.00181347	-0.00251313	0.000134792	0.000458377	0.000636467	0.00046672	0.000268973	Non-amniote	Non-amniote	Non-amniote	Non-amniote	Non-amniote	Non-amniote	Non-amniote	Non-amniote
Procuhy_nazariensis		0.229991	-0.106785	-0.0836297	-0.00727357	-0.00550154	0.0142501	0.00759578	0.0108669	0.00594043	-0.039939	-0.0147437	-0.00855016	0.00506408	0.0181887	-0.00586115	-0.00938714	-0.00467049	0.00245973	0.00320833	0.00213263	-0.000981982	-0.00545648	-0.0015563	0.00352386	0.00549827	-0.0032153	0.00164314	-0.000627007	0.00420013	-0.00235682	-4.97717e-06	0.00122095	-0.00161959	-0.00336805	-0.00260825	-0.000996264	0.00012055	0.00258795	0.000101646	-0.000178534	Non-amniote	Non-amniote	Non-amniote	Non-amniote	Non-amniote	Non-amniote	Non-amniote	Non-amniote
Procynosuchus_delaharpeae		-0.0241078	0.150978	0.052421	0.0063325	-0.00382069	-0.00257353	-0.00557523	-0.00644468	0.00443791	0.00149631	-0.00497172	0.0187865	-0.00819777	-0.00571415	-0.00229345	0.000399928	0.0118035	-0.010671	-0.000899989	0.00829037	-0.00665573	-0.00101054	0.00201349	-6.69241e-05	0.00121519	0.000699359	-0.000730514	-0.00285848	-0.00179605	-0.00348615	0.0014267	0.000168535	9.44138e-05	-0.00264108	-0.00245128	0.000706012	0.000551155	0.00205988	0.000575419	0.000423931	Amniote	Amniote	Amniote	Amniote	Synapsida	Synapsida	Synapsida	Synapsida
Purlovia_maxima		-0.0366743	0.094537	0.0770625	-0.0256279	0.0330583	-0.00681603	0.0516563	0.0104171	0.0045602	0.00789279	8.28507e-05	0.012339	0.0075694	-0.00893945	-0.00279767	0.0104583	0.0115798	0.0242139	0.00327598	0.00342773	-0.00478139	0.000127437	-0.00548454	0.00621053	-0.00347012	0.000401529	0.0028406	-0.000902029	0.00550919	-0.00201979	0.00144884	-0.000877203	0.00112623	-0.00129263	-0.00203929	-0.00055731	-2.73965e-05	-0.00229951	-0.000780926	0.000472861	Amniote	Amniote	Amniote	Amniote	Synapsida	Synapsida	Synapsida	Synapsida
Rastosuchus_hammeri		0.0237183	0.109985	-0.0386758	-0.00136102	-0.0130171	0.0211784	-0.00273337	0.00176861	0.0178357	0.00559705	-0.00375172	-9.84062e-05	-0.0104244	0.00552313	-0.00110586	-0.0128898	-0.000878457	-0.00133603	0.0084985	-0.0126362	0.00224389	-0.00423048	-0.00276345	0.00125538	-0.00391953	0.00137298	0.00113663	0.00450611	-0.00132274	0.00408661	-0.0044878	-0.000746731	0.000697146	0.00151606	-0.00193701	0.000882867	-0.000711	-0.000311214	-2.51535e-05	-0.000641917	Non-amniote	Non-amniote	Non-amniote	Non-amniote	Non-amniote	Non-amniote	Non-amniote	Non-amniote
Reiszia_gubini		-0.0140634	0.171642	0.0322692	0.0351704	-0.037132	-0.00928357	0.00140752	0.0053261	-0.00545068	-0.00211366	-0.000640846	0.0101331	0.00191634	0.00555738	-0.00444395	-0.00965582	-0.00507289	0.00732855	-0.00125347	0.00514311	0.00152695	-0.00267166	-0.0103109	-0.00475828	0.00940652	0.00342241	-0.00662675	0.00447884	0.00764327	0.00549666	0.00204636	-0.000686781	-0.00235766	-0.00275791	-0.00175225	-0.00113394	0.00171507	0.000216145	0.00050822	0.000108134	Amniote	Amniote	Amniote	Amniote	Synapsida	Synapsida	Synapsida	Synapsida
Rhachiocephalus_magnus		-0.0400335	0.0509602	0.0709671	-0.0181324	0.0301624	-0.00601195	0.0589649	0.0155967	0.00553757	0.000167537	0.00134657	-0.0147061	-0.00267451	-0.00134558	0.0024346	0.0026361	0.0022188	0.0143057	-0.00324369	-0.0212734	-0.00360256	0.000576035	0.00709141	0.00508384	0.00887683	-0.0021839	-0.00310201	-0.00276809	-0.000793347	0.00198485	0.00152073	-0.000208425	0.00056801	0.006664	-0.000447254	-0.000477526	-0.00126729	0.00104918	0.00161077	0.000382943	Amniote	Amniote	Amniote	Amniote	Synapsida	Synapsida	Synapsida	Synapsida
Sauroctonus_progressus		0.00371729	0.0784505	0.0277694	0.0325472	-0.0122149	0.0205857	0.027709	-0.0265224	-0.00531286	-0.0189397	-0.0183229	-0.0136581	0.00459142	0.00998243	-0.00240943	0.000205118	-0.00230149	0.0031632	0.0115662	0.00195657	-0.00365349	-0.00113594	-0.00940708	-0.00198216	-0.00276269	-0.00939759	0.00137197	-0.00162015	-0.00444853	0.00458135	0.0011488	-0.00166541	0.000630574	-0.000917693	0.00115747	-0.0013068	-0.00205731	-0.00204152	0.00114942	-0.000666779	Amniote	Amniote	Amniote	Amniote	Synapsida	Synapsida	Synapsida	Synapsida
Scylacosaurus_sclateri		0.0363879	0.135557	0.0306802	-0.0212366	-0.0240903	-0.0114781	-0.0274356	-0.0112689	-0.0259562	-0.0131687	-0.00243002	-0.00518387	-0.0129976	0.0105033	-0.01068	0.00623906	-0.00878343	-0.000919279	0.00610429	-0.000253656	0.000128421	-0.00309552	-0.00400663	-0.00358974	-0.00328087	0.00276577	0.00705414	0.00289534	-0.00216737	-0.00219744	-0.00306508	0.00369556	0.000156838	0.0011352	0.00124227	-0.000685916	0.000621998	-0.000585801	-0.000153392	0.000194404	Amniote	Amniote	Amniote	Amniote	Synapsida	Synapsida	Synapsida	Synapsida
Shihtienfenia_permica		0.000906075	0.0871074	-0.0205377	-0.0337382	0.0159413	0.0281316	0.00339703	0.0184594	0.0238422	0.0449309	-0.00674622	-0.0112008	-0.00599587	-0.00476413	-0.00817033	0.0108611	0.00921857	0.00365695	-0.00278232	-0.00493128	0.00795741	-0.00161892	0.00581018	-0.00501871	0.00273176	-0.00701258	0.00205991	0.00106933	0.00190151	-0.00412861	1.56881e-05	0.00173716	0.000779108	-0.00208218	0.00249919	4.27476e-05	0.00107928	-0.000488633	0.000204076	0.000830927	Amniote	Amniote	Amniote	Amniote	Sauropsida	Sauropsida	Sauropsida	Sauropsida
Sphenacodon_ferox		-0.00475287	0.0890259	0.0227801	0.0318222	-0.000195894	0.000175711	0.0166073	-0.0211083	-0.000858635	0.00181521	0.00667802	-0.0325251	0.000328908	-0.0126327	0.00334221	0.00318353	-0.00264407	0.000652193	-0.0063565	0.0155387	0.00912217	0.000759627	0.00434552	0.00343335	-0.00205243	-0.00175059	-0.00120203	0.00115349	-0.00270382	-0.00100162	6.39399e-05	-0.000296776	-0.00154567	-0.00112957	0.000758239	-0.0023317	-0.000965604	0.0011854	-0.00036824	-0.000783443	Amniote	Amniote	Amniote	Amniote	Synapsida	Synapsida	Synapsida	Synapsida
Sumidadectes_chozaensis		-0.0409122	-0.0495999	0.0663632	0.0439644	0.0147565	0.061243	0.0046664	-0.0112132	-0.0123522	0.00797242	0.0079401	0.0062175	-0.0223467	-0.00798181	0.0052659	-0.00374773	-0.00562173	-0.00129894	-0.0149452	-0.000102881	-0.00559553	0.0154031	-0.000957899	0.00121985	-0.0027619	-0.00524346	-0.000809748	0.00199366	0.00342493	-0.00424715	0.00236478	0.00319943	-0.000920309	3.32162e-06	-0.00390028	0.000654563	-0.00125964	0.000169214	-0.000176116	-0.000165847	Amniote	Amniote	Non-amniote	Amniote	Sauropsida	Sauropsida	Non-amniote	Sauropsida
Suminia_getmanovi		0.00791732	0.0407075	-0.0430358	0.00477888	-0.00429406	-0.0125369	-0.0423801	-0.0355668	-0.0119931	-0.0108596	0.0116688	-0.00730356	0.0142367	-0.00451497	-0.00204625	0.00277673	0.00471828	-0.00325436	-0.00892116	0.00344334	-0.00188711	-0.00419532	0.000334616	0.00392439	-0.00589275	-0.000988397	0.000536303	-0.000797841	0.0047545	0.000501332	-9.77599e-06	-0.00188614	-0.000512358	0.000647156	0.00259096	0.00111215	-8.15724e-05	0.000403542	7.88084e-05	0.000483516	Amniote	Amniote	Amniote	Amniote	Synapsida	Synapsida	Synapsida	Synapsida
Syodon_efremovi		-0.0301973	0.0791549	0.0332989	-0.0247046	0.00588674	0.00884622	-0.000857617	-0.000741632	0.00359191	0.00741563	0.0122034	0.0255621	0.000198146	-0.00373091	0.00600686	0.00412763	0.00448545	-0.00158353	-0.00756954	0.00410506	-0.00669109	0.00552711	-0.000382701	-0.00334562	0.000236655	0.000782477	-0.00413083	-0.00192903	-0.000890029	0.00487209	-0.00148122	0.00175577	0.00316239	-7.17775e-05	-0.00195248	-0.00179675	0.000416503	0.000205987	0.000379058	-5.36106e-05	Amniote	Amniote	Amniote	Amniote	Synapsida	Synapsida	Synapsida	Synapsida
Tapinocaninus_pamelae		0.0443565	0.0424127	-0.0880815	-0.0286939	0.0316226	-0.0562812	0.00688165	0.00113605	0.00519389	-0.0028832	0.0118593	-0.013416	0.00123078	-0.0147322	0.00380176	0.00260539	-0.0191787	0.0115108	0.000256302	0.000255967	0.0111331	0.00652533	-0.00463709	0.00554914	-0.00232901	0.000334893	-0.00582494	-0.00633231	-0.00213534	0.000243555	-0.00310368	-0.00110563	0.00247086	-0.00399692	0.000154151	-0.0011859	-0.0010658	0.0010713	-2.07824e-05	0.000782404	Amniote	Amniote	Amniote	Amniote	Synapsida	Synapsida	Synapsida	Synapsida
Tramuntanasaurus_tiai		-0.0573905	-0.0328925	0.000838777	0.0664723	0.0355253	-0.0134605	-0.08262	0.0211893	0.0279998	0.0285242	-0.00159386	-0.00478194	0.00945692	0.00337092	-0.0218042	0.00588814	-0.00663821	0.00361307	0.00524656	-0.00634533	-0.00190917	0.00816946	-0.00304297	0.00344968	-0.000471665	0.00287851	0.00183203	-0.0031916	0.00143057	-0.00203727	-0.00418244	0.000531989	-0.00300664	0.00231575	-0.00106561	-0.00190445	-0.000684786	-1.15061e-06	0.000637841	-0.000847291	Amniote	Amniote	Non-amniote	Amniote	Sauropsida	Sauropsida	Non-amniote	Sauropsida
Trimerorhachis_insignis		0.0880231	-0.0109663	-0.0792897	-0.0251889	0.0236173	0.0283527	-0.0143136	0.00967787	-0.000450876	-0.00725465	-0.0052334	-0.00828117	0.00416018	0.00450506	0.00187596	-0.00048308	-0.00112144	0.00294718	-0.0102756	0.000318836	0.00179026	0.00396067	0.00815032	-0.0065501	0.00554048	0.00215049	-0.00791658	0.00455599	-2.86408e-05	0.000563116	0.000906088	-0.00383787	-0.00142152	-0.000389937	0.000973945	0.000956614	-0.000137888	-0.000942817	0.000449086	-0.000895982	Non-amniote	Non-amniote	Non-amniote	Non-amniote	Non-amniote	Non-amniote	Non-amniote	Non-amniote
Ulemica_invisa		-0.0326378	0.00301231	0.0661766	-0.0315889	0.0514519	-0.0158236	-0.0298423	-0.0125125	-0.0484958	0.0142736	0.0311135	-0.000933717	0.0171376	0.000435788	0.0132165	0.00106303	-0.009644	-0.00706155	0.00173199	0.00870316	-0.00890378	0.0019364	-0.0040492	0.000124909	0.00883866	-0.00314305	0.00697953	0.00704969	-0.000893049	-0.00143687	-0.00501842	-0.00258979	0.000131076	0.00157378	0.000167752	-6.26498e-05	-0.000761579	0.00134282	-0.00120687	0.000471953	Amniote	Amniote	Amniote	Amniote	Synapsida	Synapsida	Synapsida	Synapsida
Whatcheeria_deltae		0.00275634	0.115387	-0.00377208	-0.0131142	-0.00418643	0.0108748	-0.0258325	-0.00110484	0.00940845	-0.00602627	0.000347593	-0.013818	-0.00226178	-0.000132412	-0.00814838	1.33071e-05	0.00407296	0.000818997	-0.00143866	0.00101009	0.00221795	0.00217873	0.00029485	-0.00259614	-0.00129382	-0.00294523	0.00233595	-0.000545254	-0.00172633	0.000492509	0.000938268	-0.00184948	-0.0029764	0.00037908	-0.00098622	-0.000908637	0.00238285	-0.000334419	0.000425623	0.000486674	Non-amniote	Non-amniote	Non-amniote	Non-amniote	Non-amniote	Non-amniote	Non-amniote	Non-amniote
Youngina_capensis		-0.0136878	0.0714717	0.0182472	0.0602505	-0.00536225	0.0219436	0.0287226	-0.0339739	-0.00464936	-0.00887354	0.0119571	-0.0264775	0.0234716	-0.00759842	0.00790501	0.00407776	-0.00742583	0.00284496	-0.00249532	0.00441308	0.00289027	0.000421955	-0.00181822	0.0012766	-0.000700679	0.000357792	0.000978984	-0.000922207	-0.0046373	9.24777e-05	-0.00156891	0.00349574	0.000964159	0.000125161	-0.000664254	0.000612782	0.00100776	0.00120595	-0.000687396	-0.000750648	Amniote	Amniote	Amniote	Amniote	Sauropsida	Sauropsida	Sauropsida	Sauropsida
[truncated: 1 more columns]

## Sheet: J Occlusal PCA Morphospace
Comparison	Following phylogenetic hypothesis:	dispRity			PERMANOVA
		W	p		F	p (adj.)
Amniotes vs. Non-amniote tetrapods	Hypothesis 1	274214	1.86744e-68		8.37582	0.001
Amniotes vs. Non-amniote tetrapods	Hypothesis 2	226863	2.65752e-99		10.2749	0.001
Amniotes vs. Non-amniote tetrapods	Hypothesis 3	342125	2.26203e-34		6.02682	0.001
Amniotes vs. Non-amniote tetrapods	Hypothesis 4	221446	3.34393e-103		8.97729	0.001
Sauropsida vs. Non-amniote tetrapods	Hypothesis 1	971886	6.92061e-292		4.0945	0.027
Synapsida vs. Non-amniote tetrapods	Hypothesis 1	639493	1.0066e-26		8.11951	0.003
Synapsida vs. Sauropsida	Hypothesis 1	97577	9.91802e-213		2.45697	0.099
Sauropsida vs. Non-amniote tetrapods	Hypothesis 2	978204	1.04115e-299		5.44176	0.009
Synapsida vs. Non-amniote tetrapods	Hypothesis 2	693304	3.48664e-50		9.4857	0.003
Synapsida vs. Sauropsida	Hypothesis 2	90366	2.3078e-220		2.04211	0.243
Sauropsida vs. Non-amniote tetrapods	Hypothesis 3	992870	0		0.77547	1
Synapsida vs. Non-amniote tetrapods	Hypothesis 3	651053	3.93549e-31		6.44763	0.003
Synapsida vs. Sauropsida	Hypothesis 3	63029	1.57272e-250		1.4396	0.561
Sauropsida vs. Non-amniote tetrapods	Hypothesis 4	972370	1.75612e-292		6.18634	0.003
Synapsida vs. Non-amniote tetrapods	Hypothesis 4	629649	3.04961e-23		9.12124	0.003
Synapsida vs. Sauropsida	Hypothesis 4	92773	8.43682e-218		3.09322	0.039
Herbivores vs. Non-herbivores	-	333179	3.53372e-38		5.93792	0.001
