# Supplementary material for: Mandibular form and function is more disparate in amniotes than in non-amniote tetrapods from the late Palaeozoic
Source: PeerJ. 2025 Nov 26;13:e20243. doi: 10.7717/peerj.20243 (PMC12664332; doi:10.7717/peerj.20243)
Supplement: Supplemental Information 4 [file peerj-13-20243-s004.xlsx]

## Sheet: Sheet1
Taxon	Anterior MA	Posterior MA	Opening MA	Maximum AR	Average AR	Articular Offset	"Dental" row	Adductor fossa	Symphysis
Acheloma_sp	0.192688	0.484324	0.0658065	0.156504	0.0939173	0.0711382	0.569106	0.28252	0.0792683
Acroplous_vorax	0.246304	0.572222	0.0778261	0.145631	0.092216	0.0174757	0.508738	0.254369	0.0640777
Adamanterpeton_ohioensis	0.154273	0.332338	0.06097	0.163355	0.0930807	0.0620309	0.512141	0.189845	0.0286976
Aerosaurus_wellesi	0.319066	0.705376	0.0853113	0.126549	0.0790038	0.0284071	0.49823	0.211504	0.0389381
Alrausuchus_tagax	0.248074	0.447222	0.0579353	0.253353	0.153065	0.111923	0.4307	0.295082	0.116244
Alveusdectes_fenestratus	0.253448	0.544444	0.0640394	0.252358	0.165706	0.0311321	0.511792	0.273585	0.143868
Annatherapsidus_petri	0.0855799	0.13	0.0445141	0.23628	0.160393	0.0492378	0.332317	0.114329	0.0518293
Anthracosaurus_russelli	0.247927	0.633475	0.103648	0.21563	0.161824	0.0303907	0.531114	0.257598	0.0260492
Araeoscelis_gracilis	0.223386	0.491358	0.0847521	0.238727	0.151584	0.17206	0.515473	0.259947	0.0353669
Archegosaurus_decheni	0.158421	0.525	0.0545614	0.160331	0.0842538	0.0181818	0.657851	0.244628	0.0859504
Archeria_crassidisca	0.155263	0.458889	0.103008	0.254833	0.1518	0.112478	0.618629	0.288225	0.0702988
Arctognathus_curvimola	0.165209	0.240584	0.135337	0.346831	0.200927	0.0792254	0.302817	0.198944	0.0880282
Aulacephalodon_kapoliwacela	0.170861	0.411843	0.149989	0.357664	0.256451	0.168385	0.584398	0.166286	0.389507
Balanerpeton_woodi	0.217729	0.456977	0.0454294	0.198953	0.127895	0.039267	0.494764	0.295812	0.0418848
Belebey_vegrandis	0.185371	0.456452	0.0650655	0.280083	0.130275	0.214108	0.564315	0.201245	0.0975104
Biarmosuchus_tener	0.249615	0.427558	0.0863198	0.351449	0.198557	0.0845109	0.391304	0.253623	0.0851449
Bolosaurus_major	0.251928	0.462264	0.107969	0.41784	0.191061	0.158216	0.415493	0.28169	0.0539906
Bolosaurus_striatus	0.205231	0.416327	0.163783	0.413926	0.1778	0.148743	0.487427	0.232108	0.065764
Bradysaurus_sp	0.226241	0.545299	0.118794	0.392405	0.22194	0.0537975	0.522152	0.170886	0.0791139
Broiliellus_reiszi	0.191074	0.464407	0.0711297	0.241379	0.115699	0.063857	0.538953	0.249042	0.0383142
Caerorhachis_bairdi	0.179582	0.56877	0.0360558	0.262248	0.176104	0.0240154	0.659942	0.260327	0.0691643
Captorhinus_laticeps	0.302804	0.558621	0.0929907	0.209607	0.128583	0.0174672	0.427948	0.388646	0.0393013
Casea_broilii	0.357547	0.795105	0.115723	0.253561	0.161232	0.141026	0.498575	0.344729	0.0883191
Chroniosaurus_dongusensis	0.160878	0.514024	0.0320611	0.145221	0.0817812	0.00367647	0.661765	0.257353	0.0606618
Chroniosuchus_paradoxus	0.156667	0.547573	0.0663889	0.170604	0.0908302	0.015748	0.674541	0.215223	0.0866142
Claudiosaurus_germaini	0.205285	0.612121	0.0936992	0.123827	0.0838998	0.011257	0.613508	0.187617	0.0187617
Cotylorhynchus_romeri	0.284314	0.588832	0.101225	0.234884	0.175387	0.123256	0.490698	0.318605	0.104651
Crassigyrinus_scoticus	0.189869	0.496078	0.0393996	0.146429	0.118929	0.0178571	0.5875	0.278571	0.0803571
Cynariops_robustus	0.137243	0.205263	0.0549853	0.237822	0.171068	0.0405444	0.323782	0.160458	0.0845272
Daptocephalus_leoniceps	0.299708	0.655056	0.202295	0.443859	0.31197	0.14163	0.536684	0.116336	0.258208
Delorhynchus_cifelli	0.22339	0.615888	0.169492	0.243077	0.146802	0.123692	0.578462	0.261538	0.0830769
Deltavjatia_rossicus	0.269502	0.655859	0.101124	0.488796	0.238144	0.0826331	0.514006	0.22549	0.0896359
Dendrerpeton_helogenes	0.171071	0.494079	0.0544419	0.178733	0.110762	0.0205882	0.649321	0.257919	0.020362
Desmatodon_hesperis	0.192663	0.551322	0.147826	0.408407	0.24048	0.0736897	0.621173	0.266217	0.123508
Diadectes_absitus	0.278653	0.608075	0.114231	0.247126	0.168743	0.0804598	0.468801	0.245484	0.0418719
Diadectes_lentus	0.334908	0.892308	0.111811	0.403465	0.283195	0.263366	0.589109	0.30198	0.0990099
Dicynodontoides_sp	0.135636	0.27147	0.122291	0.232033	0.175711	0.165585	0.480082	0.12115	0.244353
Dimetrodon_spp	0.309701	0.779343	0.0951493	0.322064	0.185066	0.204982	0.574733	0.279359	0.0925267
Diploceraspis_burkei	0.254009	0.406415	0.148703	0.250515	0.16957	0.376701	0.327835	0.238144	0.0742268
Discosauriscus_austriacus	0.217471	0.546821	0.0935632	0.194915	0.138255	0.0487288	0.555085	0.269068	0.0317797
Doragnathus_woodi	0.166043	0.544737	0.0508021	0.136709	0.0902484	0.0151899	0.658228	0.23038	0.0303797
Dvinia_prima	0.0796026	0.166022	0.0688742	0.303714	0.156029	0.0465517	0.52122	0.0676393	0.0981432
Edaphosaurus_boanerges	0.284112	1.12593	0.146417	0.30226	0.204563	0.271751	0.477401	0.279661	0.211864
Ennatosaurus_tecton	0.294394	0.546309	0.0831826	0.300166	0.233762	0.0452736	0.422886	0.334992	0.119403
Eoherpeton_watsoni	0.236179	0.521406	0.0942113	0.219448	0.118234	0.176084	0.496715	0.287779	0.0367937
Eosimops_newtoni	0.241985	0.576757	0.188118	0.289684	0.228543	0.277249	0.591872	0.113581	0.241056
Eryopoid_mandible	0.205916	0.609966	0.0363109	0.209406	0.109265	0.0201568	0.639418	0.245241	0.0660694
Eryops_megacephalus	0.180488	0.517483	0.064878	0.231651	0.128845	0.0208716	0.612385	0.307339	0.0688073
Estemmenosuchus_uralensis	0.253252	0.522763	0.0783223	0.310662	0.216371	0.0376838	0.502757	0.286765	0.10386
Euptychognathus_bathyrhynchus	0.267702	0.684341	0.146061	0.278355	0.19184	0.116352	0.565217	0.112949	0.260397
Euryodus_dalyae	0.306965	0.681768	0.150498	0.187364	0.107983	0.0958606	0.481481	0.261438	0.0283224
Feeserpeton_oklahomensis	0.249669	0.677246	0.0576159	0.217021	0.153823	0.118404	0.608511	0.302128	0.0702128
Gansurhinus_naobaogouensis	0.253041	0.563158	0.0804054	0.254717	0.152644	0.0597484	0.512579	0.169811	0.128931
Gephyrostegus_bohemicus	0.185998	0.598403	0.0342602	0.189704	0.113369	0.00476644	0.661582	0.244042	0.0419447
Glanosuchus_macrops	0.19843	0.282774	0.0313972	0.212864	0.16505	0.184686	0.290965	0.183767	0.0643185
Greererpeton_burkemorani	0.191183	0.573548	0.0537634	0.197183	0.128303	0.0342052	0.623742	0.28169	0.0744467
Haptodus_garnettensis	0.252482	0.536683	0.0676123	0.247191	0.144765	0.113258	0.503371	0.307865	0.0719101
Huskerpeton_englehorni	0.285057	0.692093	0.0745211	0.156863	0.104597	0.0784314	0.547237	0.204991	0.0249554
Ianthodon_schultzei	0.227027	0.47191	0.0735135	0.230769	0.126206	0.0358974	0.492308	0.271795	0.0564103
Iberospondylus_schultzei	0.176406	0.538721	0.0551268	0.188272	0.106728	0.0618313	0.627572	0.197531	0.0411523
Karenites_ornamentatus	0.100999	0.180612	0.0644793	0.256906	0.121381	0.0179558	0.426796	0.10221	0.0649171
Karpinskiosaurus_secundus	0.27476	0.616487	0.0452077	0.195122	0.137151	0.0182927	0.528963	0.253049	0.0289634
Kotlassia_prima	0.298942	0.649425	0.0470899	0.221939	0.142655	0.0357143	0.520408	0.280612	0.0586735
Kuwavaatakdectes_sanmiguelensis	0.238188	0.49396	0.110032	0.326409	0.225026	0.0623145	0.474777	0.237389	0.0771513
Labidosaurikos_meachami	0.210324	0.475333	0.138643	0.199482	0.123708	0.0233161	0.489637	0.30829	0.0492228
Labidosaurus_hamatus	0.275088	0.54069	0.104561	0.248387	0.167159	0.0580645	0.451613	0.335484	0.0677419
Lethiscus_stocki	0.188941	0.452394	0.0494118	0.133702	0.077707	0.0370166	0.546961	0.271823	0.0751381
Limnoscelis_paludis	0.254362	0.6064	0.0922819	0.23053	0.168185	0.0623053	0.538941	0.241433	0.113707
Llistrofus_pricei	0.293657	0.48882	0.122388	0.189711	0.140642	0.0578778	0.344051	0.324759	0.109325
Lycaenops_ornatus	0.214953	0.327635	0.048972	0.304587	0.169662	0.0972477	0.337615	0.165138	0.119266
Lycosuchus_vanderrieti	0.209497	0.315475	0.0647059	0.233793	0.160372	0.11	0.326897	0.124138	0.0827586
Megalocephalus_pachycephalus	0.179003	0.650523	0.0473634	0.210046	0.158324	0.0978995	0.690411	0.243836	0.0611872
Moradisaurus_grandis	0.222396	0.496512	0.0989583	0.183254	0.105695	0.00947867	0.50237	0.254344	0.0473934
Moschognathus_whaitsi	0.292	0.696382	0.0964138	0.318121	0.222275	0.251678	0.565101	0.263087	0.214765
Neopteroplax_conemaughensis	0.203759	0.558763	0.0796992	0.264808	0.157687	0.145296	0.58885	0.250871	0.0592334
Niassodon_mfumukasi	0.139927	0.339027	0.228584	0.314961	0.20868	0.331004	0.576772	0.113189	0.189961
Nochelesaurus_alexanderi	0.278125	0.669173	0.103125	0.408867	0.219254	0.0689655	0.460591	0.125616	0.115764
Oestocephalus_amphiuminus	0.219749	0.312946	0.0570533	0.168831	0.0982628	0.0415584	0.246753	0.254545	0.135065
Onchiodon_labyrinthicus	0.183236	0.615354	0.0315358	0.178733	0.106673	0.0193439	0.677602	0.20362	0.0214932
Orobates_pabsti	0.264656	0.577598	0.0837037	0.182489	0.123779	0.0421941	0.540084	0.305907	0.118143
Oudenodon_bainii	0.158468	0.406348	0.224827	0.313268	0.228901	0.0987305	0.561016	0.0999181	0.187551
Owenetta_sp	0.260958	0.532707	0.0948435	0.155518	0.100256	0.0401338	0.463211	0.202341	0.125418
Pantylus_cordatus	0.175055	0.657277	0.0629884	0.231111	0.169793	0.0579259	0.693333	0.185185	0.122963
Parrsboro_jaw	0.1875	0.571429	0.0553977	0.213439	0.146089	0.0237154	0.623188	0.238472	0.0922266
Pholiderpeton_attheyi	0.198009	0.601779	0.0845433	0.324503	0.20795	0.0662252	0.63245	0.280353	0.0540839
Pholiderpeton_scutigerum	0.199595	0.544751	0.0873482	0.33517	0.192623	0.0886134	0.574839	0.270891	0.046832
Phonerpeton_pricei	0.17623	0.544304	0.0813525	0.198095	0.110774	0.0419048	0.628571	0.278095	0.0990476
Petrolacosaurus_kansensis	0.216559	0.493627	0.0752688	0.181818	0.107946	0.00826446	0.539256	0.293388	0.0330579
Procynosuchus_delaharpeae	0.0866785	0.234615	0.0792185	0.258865	0.14058	0.138475	0.629433	0.108156	0.132979
Protorothyris_archeri	0.206494	0.569892	0.0522078	0.183187	0.111603	0.0809285	0.61606	0.268507	0.0363864
Purlovia_maxima	0.153351	0.273563	0.0773196	0.311138	0.229472	0.0739709	0.412833	0.244552	0.127119
Rastosuchus_hammeri	0.222501	0.613636	0.119073	0.183263	0.125546	0.0307203	0.565678	0.247881	0.0413136
Reiszia_gubini	0.189794	0.427146	0.0671134	0.20412	0.0993518	0.00561798	0.504682	0.257491	0.0917603
Rhodotheratus_parvus	0.323077	0.54375	0.0864721	0.243243	0.139367	0.022113	0.375921	0.366093	0.0859951
Sauroctonus_parringtoni	0.215657	0.347154	0.0489899	0.311751	0.184871	0.0652278	0.359712	0.18705	0.0911271
Sclerocephalus_haeuseri	0.200245	0.46954	0.0539216	0.186047	0.111385	0.00511628	0.544186	0.25814	0.0302326
Scutosaurus_sp	0.294444	0.680734	0.065873	0.555556	0.293278	0.111481	0.52963	0.181481	0.0555556
Secodontosaurus_obtusidens	0.206006	0.460403	0.095045	0.172857	0.0972612	0.0214286	0.525714	0.282857	0.0542857
Seymouria_baylorensis	0.216636	0.477823	0.0877514	0.278523	0.167802	0.0201342	0.501678	0.213087	0.0486577
Shihtienfenia_permica	0.211488	0.591241	0.161358	0.261641	0.206838	0.10643	0.545455	0.168514	0.097561
Sigournea_multidentata	0.155125	0.55082	0.0461681	0.134498	0.0988349	0.0730131	0.679476	0.213974	0.0401747
Suminia_getmanovi	0.212406	0.486173	0.0517799	0.273023	0.183968	0.104009	0.565547	0.229686	0.11701
Syodon_efremovi	0.195825	0.379576	0.0663022	0.265787	0.162684	0.00942507	0.459001	0.228087	0.0980207
Trimerorhachis_insignis	0.182242	0.740828	0.110771	0.158915	0.102722	0.0594315	0.669251	0.193798	0.0658915
Tseajaia_campi	0.16737	0.376582	0.0649789	0.236601	0.16154	0.0393464	0.51634	0.227451	0.0339869
Ulemica_invisa	0.296643	0.639474	0.104985	0.303873	0.250413	0.20576	0.523337	0.275074	0.109235
Ulemosaurus_svigagensis	0.324308	0.780741	0.141538	0.347578	0.23529	0.202279	0.541311	0.25641	0.165242
Varanosaurus_acutirostris	0.155793	0.435535	0.0615298	0.153355	0.0868846	0.04377	0.608094	0.236422	0.0372737
Viatkosuchus_sumini	0.215919	0.318124	0.077424	0.227273	0.163259	0.0454545	0.305785	0.19697	0.0606061
Whatcheeria_deltae	0.220463	0.641573	0.0752896	0.192171	0.137289	0.0569395	0.604982	0.225979	0.0551601
Youngina_capensis	0.153014	0.364135	0.0501773	0.118846	0.0792688	0.0203735	0.555178	0.202037	0.0373514
